# Supplementary material for: Use of Network Pharmacology to Explore the Mechanism of Gegen (Puerariae lobatae Radix) in the Treatment of Type 2 Diabetes Mellitus Associated with Hyperlipidemia
Source: Evid Based Complement Alternat Med. 2021 Apr 16;2021:6633402. doi: 10.1155/2021/6633402 (PMC8068526; doi:10.1155/2021/6633402)
Supplement: Supplementary Materials — include the following. Supplementary Material 1: active ingredients and targets of Gegen. Supplementary Material 2: targets of type 2 diabetes and hyperlipidemia. Supplementary Material 3: results of GO and KEGG enrichment. Supplementary Material 4: topological parameters of the compound-target-pathway network. [file 6633402.f1.zip]

Archive with 4 entries (4 files):
- 6633402.f1/1Active Ingredients and Targets of Gegen.txt
- 6633402.f1/2Targets of Diseases.txt
- 6633402.f1/3GO and KEGG Enrichment.txt
- 6633402.f1/4Topological parameters of network.txt
