# Supplementary material for: Use of Network Pharmacology to Explore the Mechanism of Gegen (Puerariae lobatae Radix) in the Treatment of Type 2 Diabetes Mellitus Associated with Hyperlipidemia
Source: Evid Based Complement Alternat Med. 2021 Apr 16;2021:6633402. doi: 10.1155/2021/6633402 (PMC8068526; doi:10.1155/2021/6633402)
Supplement: Supplementary Materials — include the following. Supplementary Material 1: active ingredients and targets of Gegen. Supplementary Material 2: targets of type 2 diabetes and hyperlipidemia. Supplementary Material 3: results of GO and KEGG enrichment. Supplementary Material 4: topological parameters of the compound-target-pathway network. [file 6633402.f1.zip › 6633402.f1/1Active Ingredients and Targets of Gegen.txt]

Active Ingredients of Gegen
	MOL ID	Molecule Name	Molecule Weight��g/mol��	OB��%��	DL	Canonical SMILES	PubChemCID
	MOL001999	Scoparone	206.21	74.75	0.09	COC1=C(C=C2C(=C1)C=CC(=O)O2)OC	8417
	MOL000392	Formononetin	268.28	69.67	0.21	COC1=CC=C(C=C1)C2=COC3=C(C2=O)C=CC(=C3)O	5280378
	MOL002959	3'-Methoxydaidzein	284.28	48.57	0.24	COC1=C(C=CC(=C1)C2=COC3=C(C2=O)C=CC(=C3)O)O	5319422
	MOL003629	Daidzein-4,7-diglucoside	578.57	47.27	0.67	C1=CC(=CC=C1C2=COC3=C(C2=O)C=CC(=C3)OC4C(C(C(C(O4)CO)O)O)O)OC5C(C(C(C(O5)CO)O)O)O	171292
	MOL000358	Beta-sitosterol	414.79	36.91	0.75	CCC(CCC(C)C1CCC2C1(CCC3C2CC=C4C3(CCC(C4)O)C)C)C(C)C	222284
	MOL012297	Puerarin	416.41	24.03	0.69	C1=CC(=CC=C1C2=COC3=C(C2=O)C=CC(=C3C4C(C(C(C(O4)CO)O)O)O)O)O	5281807
	MOL000390	Daidzein	254.25	19.44	0.19	C1=CC(=CC=C1C2=COC3=C(C2=O)C=CC(=C3)O)O	5281708
	MOL000481	Genistein	270.25	17.93	0.21	C1=CC(=CC=C1C2=COC3=CC(=CC(=C3C2=O)O)O)O	5280961
	MOL000663	Lignoceric acid	368.72	14.9	0.33	CCCCCCCCCCCCCCCCCCCCCCCC(=O)O	11197
	MOL009720	Daidzin	416.41	14.32	0.73	C1=CC(=CC=C1C2=COC3=C(C2=O)C=CC(=C3)OC4C(C(C(C(O4)CO)O)O)O)O	107971
	MOL000441	Lupenone	424.78	11.66	0.78	CC(=C)C1CCC2(C1C3CCC4C5(CCC(=O)C(C5CCC4(C3(CC2)C)C)(C)C)C)C	92158
	MOL000391	Ononin	430.44	11.52	0.78	COC1=CC=C(C=C1)C2=COC3=C(C2=O)C=CC(=C3)OC4C(C(C(C(O4)CO)O)O)O	442813
Targets of Gegen
	Entrze ID	Gene Symbol
	1718	DHCR24
	3156	HMGCR
	1410	CRYAB
	231	AKR1B1
	1586	CYP17A1
	1588	CYP19A1
	1595	CYP51A1
	2100	ESR2
	2099	ESR1
	10062	NR1H3
	7376	NR1H2
	6097	RORC
	23762	OSBP2
	6721	SREBF2
	6462	SHBG
	5241	PGR
	10499	NCOA2
	5742	PTGS1
	4513	COX2
	5566	PRKACA
	1812	DRD1
	1131	CHRM3
	1128	CHRM1
	6331	SCN5A
	2555	GABRA2
	1132	CHRM4
	5139	PDE3A
	3356	HTR2A
	2558	GABRA5
	146	ADRA1D
	2556	GABRA3
	5294	PIK3CG
	3757	KCNH2
	1129	CHRM2
	147	ADRA1B
	154	ADRB2
	1135	CHRNA2
	6532	SLC6A4
	4988	OPRM1
	2554	GABRA1
	1139	CHRNA7
	596	BCL2
	3725	JUN
	5444	PON1
	4133	MAP2
	29881	NPC1L1
	43	ACHE
	6530	SLC6A2
	1557	CYP2C19
	6095	RORA
	590	BCHE
	866	SERPINA6
	2539	G6PD
	5770	PTPN1
	9970	NR1I3
	5731	PTGER1
	5732	PTGER2
	6916	TBXAS1
	9536	PTGES
	5465	PPARA
	5467	PPARD
	2908	NR3C1
	10280	SIGMAR1
	1594	CYP27B1
	3290	HSD11B1
	6713	SQLE
	1066	CES1
	5777	PTPN6
	5771	PTPN2
	2222	FDFT1
	1717	DHCR7
	6469	SHH
	5468	PPARG
	993	CDC25A
	2741	GLRA1
	7364	UGT2B7
	5423	POLB
	217	ALDH2
	1956	EGFR
	3558	IL2
	7153	TOP2A
	7155	TOP2B
	7124	TNF
	134	ADORA1
	759	CA1
	771	CA12
	768	CA9
	760	CA2
	766	CA7
	377677	CA13
	6652	SORD
	762	CA4
	1816	DRD5
	268	AMH
	5243	ABCB1
	5802	PTPRS
	4843	NOS2
	6256	RXRA
	1432	MAPK14
	2932	GSK3B
	1017	CDK2
	1111	CHEK1
	5644	PRSS1
	890	CCNA2
	8648	NCOA1
	7299	TYR
	54106	TLR9
	3294	HSD17B2
	873	CBR1
	239	ALOX12
	4129	MAOB
	4128	MAOA
	8972	MGAM
	3358	HTR2C
	135	ADORA2A
	3292	HSD17B1
	2101	ESRRA
	2103	ESRRB
	9429	ABCG2
	5209	PFKFB3
	50507	NOX4
	246	ALOX15
	412	STS
	240	ALOX5
	329	BIRC2
	1803	DPP4
	6531	SLC6A3
	5569	PKIA
	4846	NOS3
	506	ATP5F1B
	4541	ND6
	54600	UGT1A9
	54576	UGT1A8
	54577	UGT1A7
	54575	UGT1A10
	5141	PDE4A
	1545	CYP1B1
	1543	CYP1A1
	842	CASP9
	841	CASP8
	836	CASP3
	761	CA3
	765	CA6
	23632	CA14
	11238	CA5B
	763	CA5A
	23621	BACE1
	2155	F7
	3791	KDR
	7422	VEGFA
	3569	IL6
	7157	TP53
	3949	LDLR
	847	CAT
	1576	CYP3A4
	7412	VCAM1
	1889	ECE1
	196	AHR
	8702	B4GALT4
	2690	GHR
	5034	P4HB
	51520	LARS1
	5888	RAD51
	207	AKT1
	627	BDNF
	335	APOA1
	1981	EIF4G1
	338	APOB
	6772	STAT1
	3752	KCND3
	142	PARP1
	4842	NOS1
	5617	PRL
	2566	GABRG2
	5747	PTK2
	1019	CDK4
	5595	MAPK3
	1120	CHKB
	1103	CHAT
	1559	CYP2C9
	6513	SLC2A1
	1564	CYP2D7
	1312	COMT
	5594	MAPK1
	983	CDK1
	3553	IL1B
	6347	CCL2
	6401	SELE
	6783	SULT1E1
	695	BTK
	3248	HPGD
	3630	INS
	10013	HDAC6
	5347	PLK1
	1080	CFTR
	2645	GCK
	3767	KCNJ11
	5737	PTGFR
	2720	GLB1
	6850	SYK
	2309	FOXO3
	4318	MMP9
	4313	MMP2
	2064	ERBB2
	1544	CYP1A2
	472	ATM
	1591	CYP24A1
	7852	CXCR4
	11200	CHEK2
	2185	PTK2B
	4170	MCL1
	572	BAD
	2167	FABP4
	2171	FABP5
	2864	FFAR1
	9356	SLC22A6
	8310	ACOX3
	5830	PEX5
	6342	SCP2
	2170	FABP3
	2169	FABP2
	9971	NR1H4
	151306	GPBAR1
	57016	AKR1B10
	22992	KDM2A
	23133	PHF8
	8242	KDM5C
	3293	HSD17B3
	2550	GABBR1
	2342	FNTB
	3291	HSD11B2
	54363	HAO1
	5340	PLG
	373156	GSTK1
	4048	LTA4H
	8318	CDC45
	5788	PTPRC
	781	CACNA2D1
	2346	FOLH1
	10054	UBA2
	2915	GRM5
	2891	GRIA2
	1666	DECR1
	4552	MTRR
	5447	POR
	9360	PPIG
	5743	PTGS2
	6715	SRD5A1
	8644	AKR1C3
	1645	AKR1C1
	3738	KCNA3
	3741	KCNA5
	2859	GPR35
	5159	PDGFRB
	2324	FLT4
	3480	IGF1R
	3643	INSR
	8900	CCNA1
	9212	AURKB
	6714	SRC
	1457	CSNK2A1
	4233	MET
	10733	PLK4
	7010	TEK
	6790	AURKA
	1326	MAP3K8
	673	BRAF
	2050	EPHB4
	3303	HSPA1A
	9891	NUAK1
	2268	FGR
	4067	LYN
	26	AOC1
	2936	GSR
	328	APEX1
	2166	FAAH
	7442	TRPV1
	6647	SOD1
	5601	MAPK9
	5327	PLAT
	2950	GSTP1
	6403	SELP
	185	AGTR1
	3456	IFNB1
	59272	ACE2
	1798	DPAGT1
	3718	JAK3
	3162	HMOX1
	7077	TIMP2
	7054	TH
	7099	TLR4
	54578	UGT1A6
	5599	MAPK8
	9509	ADAMTS2
	2159	F10
	224	ALDH3A2
	218	ALDH3A1
	2641	GCG
	2940	GSTA3
	2939	GSTA2
	221357	GSTA5
	2938	GSTA1
	2941	GSTA4
	27306	HPGDS
Targets of daidzin
	Targets	Gene Symbol	Entrze ID
	ALDH2	ALDH2	217
	IL2	IL2	3558
	EGFR	EGFR	1956
	AR	AR	231
	COX2	COX2	4513
	DPP4	DPP4	1803
	ESR1	ESR1	2099
	PPARG	PPARG	5468
	F10	F10	2159
	F7	F7	2155
	VEGFR2	VEGFR2	3791
	GSK3B	GSK3B	2932
	ACHE	ACHE	43
	MAOA	MAOA	4128
	ALDH3A2	ALDH3A2	224
	ALDH3A1	ALDH3A1	218
	GCG	GCG	2641
	GSTA3	GSTA3	2940
	GSTA2	GSTA2	2939
	GSTA5	GSTA5	221357
	GSTA1	GSTA1	2938
	BCHE	BCHE	590
	GSTA4	GSTA4	2941
	HPGDS	HPGDS	27306
	GSTP1	GSTP1	2950
	TNF	TNF	7124
	CA1	CA1	759
	CA12	CA12	771
	CA9	CA9	768
	ADORA1	ADORA1	134
	CA2	CA2	760
	AKR1B1	AKR1B1	231
	CA7	CA7	766
	CA13	CA13	377677
	XDH	XDH	6652
Targets of puerarin
	Target	Gene Symbol	Entrze ID
	CA12	CA12	771
	CA7	CA7	766
	ESR1	ESR1	2099
	AR	AKR1B1	231
	COX2	COX2	4513
	CA2	CA2	760
	GSK3B	GSK3B	2932
	VEGFA	VEGFA	7422
	BCL2	BCL2	596
	MMP2	MMP2	4313
	JUN	JUN	3725
	NOS2	NOS2	4843
	SOD1	SOD1	6647
	VCAM1	VCAM1	7412
	MAPK9	MAPK9	5601
	PLAT	PLAT	5327
	GSTP1	GSTP1	2950
	SELP	SELP	6403
	AGTR1	AGTR1	185
	AKR1B1	AKR1B1	231
	IFNB1	IFNB1	3456
	ACE2	ACE2	59272
	GPT	DPAGT1	1798
	JAK3	JAK3	3718
	NOS3	NOS3	4846
	PPARG	PPARG	5468
	CASP3	CASP3	836
	HMOX1	HMOX1	3162
	TIMP2	TIMP2	7077
	CYP19A1	CYP19A1	1588
	ABCB1	ABCB1	5243
	TH	TH	7054
	TLR4	TLR4	7099
	CASP9	CASP9	842
	AKT1	AKT1	207
	UGT1A8	UGT1A8	54576
	UGT1A7	UGT1A7	54577
	UGT1A3	UGT1A6	54578
	MAPK8	MAPK8	5599
	MAPK3	MAPK3	5595
	ESR2	ESR2	2100
	UGT1A1	UGT1A10	54575
	MAPK1	MAPK1	5594
	TNF	TNF	7124
	UGT1A9	UGT1A9	54600
	UGT1A10	UGT1A10	54575
	UGT1A6	UGT1A6	54578
	ADAMTS2	ADAMTS2	9509
	NOS1	NOS1	4842
	CASP8	CASP8	841
	POR	POR	5447
	MTRR	MTRR	4552
	PTPN1	PTPN1	5770
Targets of Lupenone
	Target	Gene Symbol	Entrze ID
	CYP19A1	CYP19A1	1588
	HSD11B1	HSD11B1	3290
	PTPN1	PTPN1	5770
	NR1I3	NR1I3	9970
	FAAH	FAAH	2166
	TRPV1	TRPV1	7442
	NR1H4	NR1H4	9971
	UBA2	UBA2	10054
	SAE1?	SAE1?	NA
	POLB	POLB	5423
	PTGES	PTGES	9536
	AKR1B10	AKR1B10	57016
	AR	AKR1B1	231
	CA2	CA2	760
	CA1	CA1	759
	CA4	CA4	762
Targets of scoparone
	Target	Gene Symbol	Entrze ID
	CA2	CA2	760
	CA9	CA9	768
	ACHE	ACHE	43
	PTGS1	PTGS1	5742
	BCHE	BCHE	590
	CHRM1	CHRM1	1128
	COX2	COX2	4513
	ADRB2	ADRB2	154
	SLC6A4	SLC6A4	6532
	GABRA1	GABRA1	2554
	LTA4H	LTA4H	4048
	PRKACA	PRKACA	5566
	GRIA2	GRIA2	2891
	PKIA	PKIA	5569
	CCL2	CCL2	6347
	NOS1	NOS1	4842
	NOS2	NOS2	4843
	NOS3	NOS3	4846
	DECR1	DECR1	1666
	MTRR	MTRR	4552
	POR	POR	5447
	PPIG	PPIG	9360
	CA12	CA12	771
	CA13	CA13	377677
	CA7	CA7	766
	CA1	CA1	759
	CA6	CA6	765
	CA14	CA14	23632
	CA4	CA4	762
	CA5A	CA5A	763
	CA5B	CA5B	11238
	XDH	SORD	6652
	PTGS2	PTGS2	5743
	SRD5A1	SRD5A1	6715
	ALOX5	ALOX5	240
	CBR1	CBR1	873
	ESR2	ESR2	2100
	CA3	CA3	761
	CA2	CA2	760
	AKR1C3	AKR1C3	8644
	AKR1C1	AKR1C1	1645
	EGFR	EGFR	1956
	MAOA	MAOA	4128
	KCNA3	KCNA3	3738
	KCNA5	KCNA5	3741
	MAOB	MAOB	4129
	GPR35	GPR35	2859
	ERBB2	ERBB2	2064
	AKR1B1	AKR1B1	231
	CCND1?		NA
	CDK4	CDK4	1019
	PDGFRB	PDGFRB	5159
	FLT4	FLT4	2324
	IGF1R	IGF1R	3480
	INSR	INSR	3643
	CDK2?		NA
	CCNA1	CCNA1	8900
	CCNA2	CCNA2	890
	AURKB	AURKB	9212
	GSK3B	GSK3B	2932
	SRC	SRC	6714
	PTK2	PTK2	5747
	KDR	KDR	3791
	PLK1	PLK1	5347
	CSNK2A1	CSNK2A1	1457
	MET	MET	4233
	PLK4	PLK4	10733
	TEK	TEK	7010
	AKT1	AKT1	207
	AURKA	AURKA	6790
	BACE1	BACE1	23621
	MAP3K8	MAP3K8	1326
	BRAF	BRAF	673
	EPHB4	EPHB4	2050
	HSPA1A	HSPA1A	3303
	NUAK1	NUAK1	9891
	SQLE	SQLE	6713
	FGR	FGR	2268
	LYN	LYN	4067
	ESR1	ESR1	2099
	DAO	AOC1	26
	HSD17B3	HSD17B3	3293
	GSR	GSR	2936
	APEX1	APEX1	328
Targets of lignoceric acid
	Target	Gene Symbol	Entrze ID
	FABP4	FABP4	2167
	FABP5	FABP5	2171
	FFAR1	FFAR1	2864
	SLC22A6	SLC22A6	9356
	ACOX3	ACOX3	8310
	PEX5	PEX5	5830
	SCP2	SCP2	6342
	PPARA	PPARA	5465
	FABP3	FABP3	2170
	PPARD	PPARD	5467
	FABP2	FABP2	2169
	HSD11B1	HSD11B1	3290
	AR	AKR1B1	231
	VDR	CYP27B1	1594
	NR1H4	NR1H4	9971
	POLB	POLB	5423
	CDC25A	CDC25A	993
	GPBAR1	GPBAR1	151306
	AKR1B10	AKR1B10	57016
	KDM2A	KDM2A	22992
	PHF8	PHF8	23133
	KDM5C	KDM5C	8242
	UGT2B7	UGT2B7	7364
	CYP19A1	CYP19A1	1588
	SERPINA6	SERPINA6	866
	SHBG	SHBG	6462
	HSD17B3	HSD17B3	3293
	G6PD	G6PD	2539
	GABBR1	GABBR1	2550
	PTGER2	PTGER2	5732
	PTGFR	PTGFR	5737
	FNTA?	FNTA?	NA
	FNTB	FNTB	2342
	NPC1L1	NPC1L1	29881
	GABRA2?	GABRA2?	NA
	GABRB2?	GABRB2?	NA
	GABRG2	GABRG2	2566
	HSD11B2	HSD11B2	3291
	HAO1	HAO1	54363
	CA2	CA2	760
	CA1	CA1	759
	PLG	PLG	5340
	PTPN1	PTPN1	5770
	GSTK1	GSTK1	373156
	LTA4H	LTA4H	4048
	CDC45	CDC45	8318
	PTPRC	PTPRC	5788
	CACNA2D1	CACNA2D1	781
	CHRNA7	CHRNA7	1139
	FOLH1	FOLH1	2346
	SAE1?	SAE1?	NA
	UBA2	UBA2	10054
	GRM5	GRM5	2915
	PTGES	PTGES	9536
	FDFT1	FDFT1	2222
Targets of genistein
	Target	Gene Symbol	Entrze ID
	BIRC2	BIRC2	329
	CA12	CA12	771
	CA4	CA4	762
	CA7	CA7	766
	CYP19A1	CYP19A1	1588
	DPP4	DPP4	1803
	DRD5	DRD5	1816
	EGFR	EGFR	1956
	ESR2	ESR2	2100
	ESR1	ESR1	2099
	ESRRA	ESRRA	2101
	ESRRB	ESRRB	2103
	MIF	AMH	268
	ABCB1	ABCB1	5243
	PTPRS	PTPRS	5802
	PTGS1	PTGS1	5742
	PPARG	PPARG	5468
	COX2	COX2	4513
	MAPK14	MAPK14	1432
	CDK2	CDK2	1017
	CHEK1	CHEK1	1111
	PRKACA	PRKACA	5566
	PRSS1	PRSS1	5644
	PIK3CG	PIK3CG	5294
	VEGFA	VEGFA	7422
	BCL2	BCL2	596
	MAPK3	MAPK3	5595
	MAPK1	MAPK1	5594
	JUN	JUN	3725
	NOS2	NOS2	4843
	TP53	TP53	7157
	LDLR	LDLR	3949
	CDK1	CDK1	983
	AR	AKR1B1	231
	IL1B	IL1B	3553
	CCL2	CCL2	6347
	SELE	SELE	6401
	VCAM1	VCAM1	7412
	SULT1E1	SULT1E1	6783
	HMGCR	HMGCR	3156
	BTK	BTK	695
	HPGD	HPGD	3248
	INS	INS	3630
	AKR1B1	AKR1B1	231
	HDAC6	HDAC6	10013
	PLK1	PLK1	5347
	CFTR	CFTR	1080
	GCK	GCK	2645
	KCNJ11	KCNJ11	3767
	PTGFR	PTGFR	5737
	GLB1	GLB1	2720
	SYK	SYK	6850
	CYP1A1	CYP1A1	1543
	NOS3	NOS3	4846
	AKT1	AKT1	207
	FOXO3	FOXO3	2309
	IL6	IL6	3569
	CASP3	CASP3	836
	MMP9	MMP9	4318
	MMP2	MMP2	4313
	ERBB2	ERBB2	2064
	CYP1A2	CYP1A2	1544
	PTK2	PTK2	5747
	ATM	ATM	472
	CYP24A1	CYP24A1	1591
	CXCR4	CXCR4	7852
	CHEK2	CHEK2	11200
	CYP27B1	CYP27B1	1594
	PTK2B	PTK2B	2185
	TOP2A	TOP2A	7153
	ABCG2	ABCG2	9429
	TBXAS1	TBXAS1	6916
	MAOA	MAOA	4128
	MGAM	MGAM	8972
	HTR2A	HTR2A	3356
	HTR2C	HTR2C	3358
	ADORA1	ADORA1	134
	ADORA2A	ADORA2A	135
	HSD17B1	HSD17B1	3292
	ALDH2	ALDH2	217
	HSD17B2	HSD17B2	3294
	CBR1	CBR1	873
	ALOX12	ALOX12	239
	IL2	IL2	3558
	TYR	TYR	7299
	XDH	SORD	6652
	PFKFB3	PFKFB3	5209
	ALOX15	ALOX15	246
	SLC6A2	SLC6A2	6530
	MAOB	MAOB	4129
	NOX4	NOX4	50507
	PON1	PON1	5444
	CA2	CA2	760
	CA1	CA1	759
	STS	STS	412
	PPARA	PPARA	5465
	PTPN1	PTPN1	5770
	TLR9	TLR9	54106
	ACHE	ACHE	43
	MCL1	MCL1	4170
	BAD	BAD	572
targets of daidzein
	Target	Gene Symbol	Entrze ID
	PFKFB3	PFKFB3	5209
	ALDH2	ALDH2	217
	ALOX5	ALOX5	240
	BIRC2	BIRC2	329
	ESR1	ESR1	2099
	CA12	CA12	771
	CA4	CA4	762
	CA7	CA7	766
	CYP19A1	CYP19A1	1588
	DPP4	DPP4	1803
	DRD5	DRD5	1816
	EGFR	EGFR	1956
	ESR2	ESR2	2100
	ESRRA	ESRRA	2101
	ESRRB	ESRRB	2103
	MIF	AMH	268
	ABCB1	ABCB1	5243
	PTGS1	PTGS1	5742
	PPARG	PPARG	5468
	COX2	COX2	4513
	RXRA	RXRA	6256
	ADRB2	ADRB2	154
	MAPK14	MAPK14	1432
	CDK2	CDK2	1017
	CHEK1	CHEK1	1111
	PRKACA	PRKACA	5566
	PRSS1	PRSS1	5644
	PDE3A	PDE3A	5139
	VEGFA	VEGFA	7422
	JUN	JUN	3725
	IL6	IL6	3569
	NOS2	NOS2	4843
	TP53	TP53	7157
	LDLR	LDLR	3949
	CAT	CAT	847
	CYP3A4	CYP3A4	1576
	VCAM1	VCAM1	7412
	ECE1	ECE1	1889
	AHR	AHR	196
	ATP5F1B	ATP5F1B	506
	MT-ND6	ND6	4541
	B4GALT4	B4GALT4	8702
	GHR	GHR	2690
	P4HB	P4HB	5034
	LARS1	LARS1	51520
	RAD51	RAD51	5888
	NOS3	NOS3	4846
	AKT1	AKT1	207
	BDNF	BDNF	627
	APOA1	APOA1	335
	PPARA	PPARA	5465
	EIF4G1	EIF4G1	1981
	APOB	APOB	338
	IL2	IL2	3558
	STAT1	STAT1	6772
	KCND3	KCND3	3752
	PARP1	PARP1	142
	NOS1	NOS1	4842
	PRL	PRL	5617
	GABRG2	GABRG2	2566
	UGT1A8	UGT1A8	54576
	UGT1A9	UGT1A9	54600
	UGT1A1	UGT1A10	54575
	UGT1A7	UGT1A7	54577
	UGT1A10	UGT1A10	54575
	CASP3	CASP3	836
	CYP1A1	CYP1A1	1543
	CYP1B1	CYP1B1	1545
	PTK2	PTK2	5747
	CDK4	CDK4	1019
	MAPK3	MAPK3	5595
	CKB	CHKB	1120
	CHAT	CHAT	1103
	CYP2C9	CYP2C9	1559
	SLC2A1	SLC2A1	6513
	CYP2D6	CYP2D7	1564
	COMT	COMT	1312
	MAPK1	MAPK1	5594
	TBXAS1	TBXAS1	6916
	MAOA	MAOA	4128
	MGAM	MGAM	8972
	HTR2A	HTR2A	3356
	HTR2C	HTR2C	3358
	ADORA1	ADORA1	134
	ADORA2A	ADORA2A	135
	HSD17B1	HSD17B1	3292
	ABCG2	ABCG2	9429
	ALOX12	ALOX12	239
	TYR	TYR	7299
	XDH	SORD	6652
	HSD17B2	HSD17B2	3294
	CBR1	CBR1	873
	PTPRS	PTPRS	5802
	ALOX15	ALOX15	246
	SLC6A2	SLC6A2	6530
	MAOB	MAOB	4129
	PON1	PON1	5444
	NOX4	NOX4	50507
	CA2	CA2	760
	CA1	CA1	759
	STS	STS	412
	TLR9	TLR9	54106
	PTPN1	PTPN1	5770
	ACHE	ACHE	43
	CA3	CA3	761
	CA6	CA6	765
	CA14	CA14	23632
	CA9	CA9	768
	CA13	CA13	377677
	CA5B	CA5B	11238
	CA5A	CA5A	763
Targets of Ononin
	Target	Gene Symbol	Entrze ID
	ALDH2	ALDH2	217
	EGFR	EGFR	1956
	IL2	IL2	3558
	NOS2	NOS2	4843
	ESR1	ESR1	2099
	AR	AKR1B1	231
	COX2	COX2	4513
	F7	F7	2155
	KDR	KDR	3791
	DPP4	DPP4	1803
	PPARG	PPARG	5468
	ALDH2	ALDH2	217
	TNF	TNF	7124
	ADORA1	ADORA1	134
	CA1	CA1	759
	CA12	CA12	771
	CA9	CA9	768
	CA2	CA2	760
	AKR1B1	AKR1B1	231
	CA7	CA7	766
	CA13	CA13	377677
	XDH	SORD	6652
targets of formononetin
	Target	Gene Symbol	Entrze ID
	PFKFB3	PFKFB3	5209
	ALDH2	ALDH2	217
	ALOX5	ALOX5	240
	BIRC2	BIRC2	329
	CA12	CA12	771
	CA4	CA4	762
	CA7	CA7	766
	CYP19A1	CYP19A1	1588
	DPP4	DPP4	1803
	DRD5	DRD5	1816
	EGFR	EGFR	1956
	ESR2	ESR2	2100
	ESR1	ESR1	2099
	ESRRA	ESRRA	2101
	ESRRB	ESRRB	2103
	MIF	AMH	268
	ABCB1	ABCB1	5243
	NOS2	NOS2	4843
	PTGS1	PTGS1	5742
	CHRM1	CHRM1	1128
	AR	AKR1B1	231
	PPARG	PPARG	5468
	COX2	COX2	4513
	RXRA	RXRA	6256
	PDE3A	PDE3A	5139
	ADRA1A	ADRA1D	146
	SLC6A3	SLC6A3	6531
	ADRB2	ADRB2	154
	SLC6A4	SLC6A4	6532
	MAPK14	MAPK14	1432
	GSK3B	GSK3B	2932
	CDK2	CDK2	1017
	MAOB	MAOB	4129
	CHEK1	CHEK1	1111
	PRKACA	PRKACA	5566
	PRSS1	PRSS1	5644
	CCNA2	CCNA2	890
	PKIA	PKIA	5569
	NOS3	NOS3	4846
	ACHE	ACHE	43
	JUN	JUN	3725
	ATP5F1B	ATP5F1B	506
	MT-ND6	ND6	4541
	UGT1A9	UGT1A9	54600
	UGT1A8	UGT1A8	54576
	UGT1A7	UGT1A7	54577
	UGT1A10	UGT1A10	54575
	UGT1A1	UGT1A10	54575
	PDE4A	PDE4A	5141
	CYP1B1	CYP1B1	1545
	CYP1A1	CYP1A1	1543
	CASP9	CASP9	842
	CASP8	CASP8	841
	CASP3	CASP3	836
	IL2	IL2	3558
	HSD17B2	HSD17B2	3294
	CBR1	CBR1	873
	TBXAS1	TBXAS1	6916
	MAOA	MAOA	4128
	MGAM	MGAM	8972
	HTR2A	HTR2A	3356
	HTR2C	HTR2C	3358
	ADORA1	ADORA1	134
	ADORA2A	ADORA2A	135
	HSD17B1	HSD17B1	3292
	ABCG2	ABCG2	9429
	SLC6A2	SLC6A2	6530
	ALOX12	ALOX12	239
	TYR	TYR	7299
	XDH	SORD	6652
	PTPRS	PTPRS	5802
	CA2	CA2	760
	CA1	CA1	759
	PPARA	PPARA	5465
	ALOX15	ALOX15	246
	TLR9	TLR9	54106
	NOX4	NOX4	50507
	PON1	PON1	5444
	CA3	CA3	761
	CA6	CA6	765
	CA14	CA14	23632
	CA9	CA9	768
	CA13	CA13	377677
	CA5B	CA5B	11238
	CA5A	CA5A	763
	STS	STS	412
	PTPN1	PTPN1	5770
	BACE1	BACE1	23621
Targets of 3'-Methoxydaidzein
	Target	Gene Symbol	Entrze ID
	CA12	CA12	771
	CA4	CA4	762
	CA7	CA7	766
	CYP19A1	CYP19A1	1588
	DRD5	DRD5	1816
	EGFR	EGFR	1956
	ESR2	ESR2	2100
	ESR1	ESR1	2099
	MIF	AMH	268
	ABCB1	ABCB1	5243
	PTPRS	PTPRS	5802
	NOS2	NOS2	4843
	COX2	COX2	4513
	AR	AKR1B1	231
	PPARG	PPARG	5468
	RXRA	RXRA	6256
	MAPK14	MAPK14	1432
	GSK3B	GSK3B	2932
	CDK2	CDK2	1017
	CHEK1	CHEK1	1111
	PRKACA	PRKACA	5566
	PRSS1	PRSS1	5644
	CCNA2	CCNA2	890
	NCOA1	NCOA1	8648
	TYR	TYR	7299
	PPARA	PPARA	5465
	IL2	IL2	3558
	TLR9	TLR9	54106
	HSD17B2	HSD17B2	3294
	CBR1	CBR1	873
	ALDH2	ALDH2	217
	ALOX12	ALOX12	239
	MAOB	MAOB	4129
	TBXAS1	TBXAS1	6916
	MAOA	MAOA	4128
	MGAM	MGAM	8972
	HTR2A	HTR2A	3356
	HTR2C	HTR2C	3358
	ADORA1	ADORA1	134
	ADORA2A	ADORA2A	135
	HSD17B1	HSD17B1	3292
	ESRRA	ESRRA	2101
	ESRRB	ESRRB	2103
	ABCG2	ABCG2	9429
	PTGS1	PTGS1	5742
	SLC6A2	SLC6A2	6530
	CA2	CA2	760
	CA1	CA1	759
	XDH	SORD	6652
	PFKFB3	PFKFB3	5209
	NOX4	NOX4	50507
	ALOX15	ALOX15	246
	ACHE	ACHE	43
	PON1	PON1	5444
	PTPN1	PTPN1	5770
	STS	STS	412
Targets of Daidzein-4,7-diglucoside
	Target	Gene Symbol	Entrze ID
	ALDH2	ALDH2	217
	EGFR	EGFR	1956
	IL2	IL2	3558
	TOP2A	TOP2A	7153
	TOP2B	TOP2B	7155
	TNF	TNF	7124
	ADORA1	ADORA1	134
	CA1	CA1	759
	CA12	CA12	771
	CA9	CA9	768
	CA2	CA2	760
	AKR1B1	AKR1B1	231
	CA7	CA7	766
	CA13	CA13	377677
	XDH	SORD	6652
Targets of beta-sitosterol
	Target	Gene Symbol	Entrze ID
	DHCR24	DHCR24	1718
	HMGCR	HMGCR	3156
	CRYAB	CRYAB	1410
	AR	AKR1B1	231
	CYP17A1	CYP17A1	1586
	CYP19A1	CYP19A1	1588
	CYP51A1	CYP51A1	1595
	ESR2	ESR2	2100
	ESR1	ESR1	2099
	NR1H3	NR1H3	10062
	NR1H2	NR1H2	7376
	RORC	RORC	6097
	OSBP2	OSBP2	23762
	SREBF2	SREBF2	6721
	SHBG	SHBG	6462
	PGR	PGR	5241
	NCOA2	NCOA2	10499
	PTGS1	PTGS1	5742
	COX2	COX2	4513
	PRKACA	PRKACA	5566
	DRD1	DRD1	1812
	CHRM3	CHRM3	1131
	CHRM1	CHRM1	1128
	SCN5A	SCN5A	6331
	GABRA2	GABRA2	2555
	CHRM4	CHRM4	1132
	PDE3A	PDE3A	5139
	HTR2A	HTR2A	3356
	GABRA5	GABRA5	2558
	ADRA1A	ADRA1D	146
	GABRA3	GABRA3	2556
	PIK3CG	PIK3CG	5294
	KCNH2	KCNH2	3757
	CHRM2	CHRM2	1129
	ADRA1B	ADRA1B	147
	ADRB2	ADRB2	154
	CHRNA2	CHRNA2	1135
	SLC6A4	SLC6A4	6532
	OPRM1	OPRM1	4988
	GABRA1	GABRA1	2554
	CHRNA7	CHRNA7	1139
	BCL2	BCL2	596
	JUN	JUN	3725
	PON1	PON1	5444
	MAP2	MAP2	4133
	NPC1L1	NPC1L1	29881
	ACHE	ACHE	43
	SLC6A2	SLC6A2	6530
	CYP2C19	CYP2C19	1557
	RORA	RORA	6095
	BCHE	BCHE	590
	SERPINA6	SERPINA6	866
	G6PD	G6PD	2539
	PTPN1	PTPN1	5770
	NR1I3	NR1I3	9970
	PTGER1	PTGER1	5731
	PTGER2	PTGER2	5732
	TBXAS1	TBXAS1	6916
	PTGES	PTGES	9536
	PPARA	PPARA	5465
	PPARD	PPARD	5467
	NR3C1	NR3C1	2908
	SIGMAR1	SIGMAR1	10280
	VDR	CYP27B1	1594
	HSD11B1	HSD11B1	3290
	SQLE	SQLE	6713
	CES2	CES1	1066
	PTPN6	PTPN6	5777
	PTPN2	PTPN2	5771
	FDFT1	FDFT1	2222
	DHCR7	DHCR7	1717
	SHH	SHH	6469
	PPARG	PPARG	5468
	CDC25A	CDC25A	993
	GLRA1	GLRA1	2741
	UGT2B7	UGT2B7	7364
	POLB	POLB	5423
