# Supplementary material for: Use of Network Pharmacology to Explore the Mechanism of Gegen (Puerariae lobatae Radix) in the Treatment of Type 2 Diabetes Mellitus Associated with Hyperlipidemia
Source: Evid Based Complement Alternat Med. 2021 Apr 16;2021:6633402. doi: 10.1155/2021/6633402 (PMC8068526; doi:10.1155/2021/6633402)
Supplement: Supplementary Materials — include the following. Supplementary Material 1: active ingredients and targets of Gegen. Supplementary Material 2: targets of type 2 diabetes and hyperlipidemia. Supplementary Material 3: results of GO and KEGG enrichment. Supplementary Material 4: topological parameters of the compound-target-pathway network. [file 6633402.f1.zip › 6633402.f1/2Targets of Diseases.txt]

Targets of T2DM
	Entrze ID	Genesymbol
	3630	INS
	3767	KCNJ11
	2645	GCK
	6833	ABCC8
	3643	INSR
	6927	HNF1A
	3172	HNF4A
	4000	LMNA
	5468	PPARG
	7466	WFS1
	3651	PDX1
	6928	HNF1B
	7124	TNF
	4760	NEUROD1
	5078	PAX4
	213	ALB
	3569	IL6
	3667	IRS1
	1636	ACE
	3952	LEP
	348	APOE
	6934	TCF7L2
	6514	SLC2A2
	3479	IGF1
	7422	VEGFA
	7157	TP53
	26580	BSCL2
	338	APOB
	3559	IL2RA
	3553	IL1B
	335	APOA1
	5167	ENPP1
	207	AKT1
	3586	IL10
	208	AKT2
	3936	LCP1
	3990	LIPC
	169026	SLC30A8
	6517	SLC2A4
	7249	TSC2
	8462	KLF11
	56729	RETN
	6774	STAT3
	3481	IGF2
	3077	HFE
	1493	CTLA4
	1594	CYP27B1
	847	CAT
	5972	REN
	6647	SOD1
	185	AGTR1
	7099	TLR4
	7054	TH
	5444	PON1
	4846	NOS3
	1071	CETP
	4318	MMP9
	5054	SERPINE1
	3383	ICAM1
	1499	CTNNB1
	640	BLK
	50943	FOXP3
	2475	MTOR
	7450	VWF
	6347	CCL2
	10644	IGF2BP2
	5443	POMC
	256297	PTF1A
	9370	ADIPOQ
	8660	IRS2
	3123	HLA-DRB1
	4221	MEN1
	345	APOC3
	1029	CDKN2A
	3265	HRAS
	773	CACNA1A
	6513	SLC2A1
	7097	TLR2
	2571	GAD1
	3784	KCNQ1
	3458	IFNG
	11132	CAPN10
	6772	STAT1
	3953	LEPR
	5295	PIK3R1
	169792	GLIS3
	10555	AGPAT2
	7273	TTN
	116519	APOA5
	4313	MMP2
	2099	ESR1
	5979	RET
	4544	MTNR1B
	959	CD40LG
	3991	LIPE
	26191	PTPN22
	2688	GH1
	7040	TGFB1
	326	AIRE
	5290	PIK3CA
	183	AGT
	1056	CEL
	2335	FN1
	2775	GNAO1
	4567	TRNL1
	79068	FTO
	3480	IGF1R
	1906	EDN1
	154	ADRB2
	1376	CPT2
	472	ATM
	1409	CRYAA
	1471	CST3
	6648	SOD2
	7486	WRN
	7098	TLR3
	675	BRCA2
	4160	MC4R
	2778	GNAS
	2690	GHR
	9451	EIF2AK3
	5433	POLR2D
	4049	LTA
	4018	LPA
	4535	ND1
	3039	HBA1
	3717	JAK2
	4524	MTHFR
	1356	CP
	2033	EP300
	627	BDNF
	155	ADRB3
	50674	NEUROG3
	2642	GCGR
	1401	CRP
	5741	PTH
	7133	TNFRSF1B
	406991	MIR21
	3106	HLA-B
	5770	PTPN1
	6714	SRC
	9927	MFN2
	9479	MAPK8IP1
	3162	HMOX1
	6622	SNCA
	3105	HLA-A
	1589	CYP21A2
	3558	IL2
	10560	SLC19A2
	3557	IL1RN
	351	APP
	1374	CPT1A
	948	CD36
	7248	TSC1
	2260	FGFR1
	7132	TNFRSF1A
	51738	GHRL
	4306	NR3C2
	6524	SLC5A2
	4843	NOS2
	186	AGTR2
	2641	GCG
	7066	THPO
	5506	PPP1R3A
	4669	NAGLU
	57104	PNPLA2
	4803	NGF
	64135	IFIH1
	958	CD40
	346171	ZFP57
	2538	G6PC
	5346	PLIN1
	718	C3
	1234	CCR5
	2353	FOS
	1760	DMPK
	4547	MTTP
	54205	CYCS
	567	B2M
	551	AVP
	5340	PLG
	7555	CNBP
	3040	HBA2
	846	CASR
	19	ABCA1
	7494	XBP1
	10891	PPARGC1A
	22796	COG2
	2056	EPO
	4763	NF1
	5602	MAPK10
	5798	PTPRN
	7399	USH2A
	3762	KCNJ5
	4359	MPZ
	23064	SETX
	7056	THBD
	8694	DGAT1
	3098	HK1
	4647	MYO7A
	2820	GPD2
	1278	COL1A2
	3949	LDLR
	3117	HLA-DQA1
	4041	LRP5
	4792	NFKBIA
	356	FASLG
	8398	PLA2G6
	1956	EGFR
	217	ALDH2
	7276	TTR
	5743	PTGS2
	5728	PTEN
	80067	DCAF17
	406913	MIR126
	825	CAPN3
	650	BMP2
	355	FAS
	5625	PRODH
	5325	PLAGL1
	590	BCHE
	26503	SLC17A5
	2617	GARS1
	940	CD28
	2263	FGFR2
	2064	ERBB2
	2990	GUSB
	673	BRAF
	7369	UMOD
	672	BRCA1
	231	AKR1B1
	3290	HSD11B1
	3791	KDR
	6390	SDHB
	2157	F8
	7096	TLR1
	7840	ALMS1
	2261	FGFR3
	9971	NR1H4
	2627	GATA6
	3636	INPPL1
	2673	GFPT1
	43	ACHE
	7048	TGFBR2
	723961	INS-IGF2
	2100	ESR2
	2572	GAD2
	3576	CXCL8
	2200	FBN1
	3159	HMGA1
	9882	TBC1D4
	4878	NPPA
	7352	UCP3
	255738	PCSK9
	5788	PTPRC
	6356	CCL11
	5604	MAP2K1
	1803	DPP4
	4921	DDR2
	4261	CIITA
	2147	F2
	5594	MAPK1
	1586	CYP17A1
	406952	MIR17
	596	BCL2
	2997	GYS1
	59341	TRPV4
	1813	DRD2
	3516	RBPJ
	7100	TLR5
	5611	DNAJC3
	6891	TAP2
	3043	HBB
	55811	ADCY10
	3845	KRAS
	344	APOC2
	406938	MIR146A
	5445	PON2
	3565	IL4
	3356	HTR2A
	60	ACTB
	54901	CDKAL1
	5373	PMM2
	1033	CDKN3
	2321	FLT1
	2308	FOXO1
	22926	ATF6
	857	CAV1
	114548	NLRP3
	2006	ELN
	5837	PYGM
	3375	IAPP
	4868	NPHS1
	177	AGER
	3339	HSPG2
	8473	OGT
	554	AVPR2
	6010	RHO
	3758	KCNJ1
	3291	HSD11B2
	2548	GAA
	6690	SPINK1
	2303	FOXC2
	3329	HSPD1
	1387	CREBBP
	720	C4A
	7021	TFAP2B
	359	AQP2
	6890	TAP1
	1950	EGF
	2784	GNB3
	1312	COMT
	2395	FXN
	387082	SUMO4
	406936	MIR144
	2155	F7
	1535	CYBA
	5106	PCK2
	221895	JAZF1
	3670	ISL1
	4094	MAF
	3684	ITGAM
	3596	IL13
	5781	PTPN11
	4353	MPO
	5345	SERPINF2
	1392	CRH
	51083	GAL
	6794	STK11
	583	BBS2
	3482	IGF2R
	337	APOA4
	2158	F9
	51085	MLXIPL
	6261	RYR1
	406932	MIR140
	6329	SCN4A
	1080	CFTR
	3486	IGFBP3
	5696	PSMB8
	2992	GYG1
	2629	GBA
	5092	PCBD1
	10269	ZMPSTE24
	690	BTF3P11
	7412	VCAM1
	6696	SPP1
	5599	MAPK8
	1585	CYP11B2
	1576	CYP3A4
	3113	HLA-DPA1
	619552	MIR483
	336	APOA2
	5805	PTS
	1536	CYBB
	4538	ND4
	4089	SMAD4
	462	SERPINC1
	7042	TGFB2
	7015	TERT
	9563	H6PD
	6469	SHH
	5698	PSMB9
	1188	CLCNKB
	6262	RYR2
	654	BMP6
	3575	IL7R
	8431	NR0B2
	84059	ADGRV1
	5465	PPARA
	80339	PNPLA3
	8600	TNFSF11
	5573	PRKAR1A
	26060	APPL1
	8647	ABCB11
	7038	TG
	5595	MAPK3
	595	CCND1
	4556	TRNE
	1277	COL1A1
	6311	ATXN2
	3606	IL18
	4654	MYOD1
	6750	SST
	2670	GFAP
	920	CD4
	406934	MIR142
	63976	PRDM16
	632	BGLAP
	1027	CDKN1B
	1588	CYP19A1
	5294	PIK3CG
	4292	MLH1
	973	CD79A
	5406	PNLIP
	4780	NFE2L2
	6559	SLC12A3
	6121	RPE65
	406910	MIR125A
	836	CASP3
	1649	DDIT3
	80184	CEP290
	6462	SHBG
	775	CACNA1C
	493856	CISD2
	5624	PROC
	4609	MYC
	1280	COL2A1
	1432	MAPK14
	6335	SCN9A
	2247	FGF2
	64072	CDH23
	55384	MEG3
	2539	G6PD
	5213	PFKM
	2705	GJB1
	1050	CEBPA
	5580	PRKCD
	8337	H2AC18
	2706	GJB2
	406995	MIR181A1
	54575	UGT1A10
	2074	ERCC6
	284119	CAVIN1
	5428	POLG
	3485	IGFBP2
	7439	BEST1
	667	DST
	999	CDH1
	4790	NFKB1
	619554	MIR486-1
	574447	MIR146B
	5071	PRKN
	5792	PTPRF
	31	ACACA
	629	CFB
	57061	HYMAI
	148738	HJV
	4864	NPC1
	7019	TFAM
	5133	PDCD1
	4137	MAPT
	5243	ABCB1
	5894	RAF1
	57817	HAMP
	407021	MIR29A
	8481	OFD1
	6597	SMARCA4
	3484	IGFBP1
	2697	GJA1
	100	ADA
	2806	GOT2
	5327	PLAT
	2984	GUCY2C
	6103	RPGR
	841	CASP8
	6401	SELE
	94	ACVRL1
	406947	MIR155
	4205	MEF2A
	4566	TRNK
	5579	PRKCB
	4914	NTRK1
	406914	MIR127
	23095	KIF1B
	4323	MMP14
	4513	COX2
	3082	HGF
	407026	MIR29C
	1755	DMBT1
	5774	PTPN3
	6609	SMPD1
	1154	CISH
	4314	MMP3
	118	ADD1
	2740	GLP1R
	7046	TGFBR1
	6387	CXCL12
	3315	HSPB1
	181	AGRP
	55624	POMGNT1
	4813	NIDDM2
	1798	DPAGT1
	7391	USF1
	5339	PLEC
	3757	KCNH2
	3091	HIF1A
	6331	SCN5A
	10219	KLRG1
	3425	IDUA
	2678	GGT1
	4512	COX1
	5265	SERPINA1
	7428	VHL
	1917	EEF1A2
	5727	PTCH1
	63924	CIDEC
	9021	SOCS3
	51259	TMEM216
	406992	MIR210
	178	AGL
	65125	WNK1
	8074	FGF23
	3725	JUN
	1564	CYP2D7
	6855	SYP
	866	SERPINA6
	308	ANXA5
	4088	SMAD3
	26353	HSPB8
	3710	ITPR3
	4286	MITF
	7490	WT1
	376497	SLC27A1
	30061	SLC40A1
	726	CAPN5
	7351	UCP2
	7036	TFR2
	582	BBS1
	55315	SLC29A3
	4852	NPY
	442909	MIR342
	7299	TYR
	1268	CNR1
	5080	PAX6
	3815	KIT
	494327	MIR378A
	5159	PDGFRB
	4851	NOTCH1
	3107	HLA-C
	6557	SLC12A1
	5176	SERPINF1
	11317	RBPJL
	2796	GNRH1
	57679	ALS2
	5116	PCNT
	7401	CLRN1
	6638	SNRPN
	477	ATP1A2
	54903	MKS1
	2597	GAPDH
	5961	PRPH2
	3418	IDH2
	2720	GLB1
	2316	FLNA
	4508	ATP6
	1786	DNMT1
	5590	PRKCZ
	52	ACP1
	2065	ERBB3
	2668	GDNF
	4312	MMP1
	1557	CYP2C19
	4893	NRAS
	4436	MSH2
	3551	IKBKB
	3156	HMGCR
	4204	MECP2
	283120	H19
	1235	CCR6
	6657	SOX2
	12	SERPINA3
	6403	SELP
	24	ABCA4
	8651	SOCS1
	5328	PLAU
	54496	PRMT7
	23411	SIRT1
	65217	PCDH15
	4311	MME
	1026	CDKN1A
	5313	PKLR
	1406	CRX
	1544	CYP1A2
	1019	CDK4
	1756	DMD
	8100	IFT88
	8842	PROM1
	8639	AOC3
	5360	PLTP
	50982	NIDDM3
	5293	PIK3CD
	859	CAV3
	3240	HP
	7350	UCP1
	2317	FLNB
	1890	TYMP
	3439	IFNA1
	641	BLM
	3931	LCAT
	7253	TSHR
	407040	MIR34A
	5925	RB1
	79147	FKRP
	4193	MDM2
	3627	CXCL10
	406989	MIR206
	1861	TOR1A
	2113	ETS1
	5158	PDE6B
	5376	PMP22
	324	APC
	100188782	NIDDM4
	1385	CREB1
	885	CCK
	860	RUNX2
	5799	PTPRN2
	5335	PLCG1
	1290	COL5A2
	5873	RAB27A
	925	CD8A
	7307	U2AF1
	2646	GCKR
	23322	RPGRIP1L
	1028	CDKN1C
	54840	APTX
	724027	MIR657
	2253	FGF8
	6348	CCL3
	6777	STAT5B
	3416	IDE
	652	BMP4
	4854	NOTCH3
	25861	WHRN
	5578	PRKCA
	2736	GLI2
	3560	IL2RB
	2811	GP1BA
	1490	CCN2
	331	XIAP
	5291	PIK3CB
	8924	HERC2
	1639	DCTN1
	3934	LCN2
	3605	IL17A
	3087	HHEX
	23118	TAB2
	54106	TLR9
	259	AMBP
	2908	NR3C1
	291	SLC25A4
	4668	NAGA
	4541	ND6
	11200	CHEK2
	3407	IDDM8
	8972	MGAM
	2521	FUS
	1910	EDNRB
	3552	IL1A
	6925	TCF4
	2332	FMR1
	915	CD3D
	7415	VCP
	10135	NAMPT
	51428	DDX41
	407008	MIR223
	2936	GSR
	4519	CYTB
	3554	IL1R1
	3403	IDDM4
	6402	SELL
	6484	ST3GAL4
	5551	PRF1
	5592	PRKG1
	811	CALR
	3406	IDDM7
	1559	CYP2C9
	6476	SI
	8912	CACNA1H
	3412	IDDM13
	4233	MET
	10908	PNPLA6
	5015	OTX2
	796	CALCA
	9378	NRXN1
	3099	HK2
	10083	USH1C
	80208	SPG11
	1281	COL3A1
	3410	IDDM11
	4514	COX3
	1030	CDKN2B
	5617	PRL
	5663	PSEN1
	410	ARSA
	3981	LIG4
	2243	FGA
	2022	ENG
	6606	SMN1
	7941	PLA2G7
	3402	IDDM3
	63036	CELA2A
	4879	NPPB
	5888	RAD51
	4758	NEU1
	3690	ITGB3
	5145	PDE6A
	585	BBS4
	164656	TMPRSS6
	3593	IL12B
	7139	TNNT2
	4582	MUC1
	23308	ICOSLG
	5311	PKD2
	7518	XRCC4
	3689	ITGB2
	2146	EZH2
	2495	FTH1
	1785	DNM2
	3417	IDH1
	9227	LRAT
	222546	RFX6
	123016	TTC8
	4625	MYH7
	2169	FABP2
	6652	SORD
	54806	AHI1
	6314	ATXN7
	6687	SPG7
	6337	SCNN1A
	6720	SREBF1
	57560	IFT80
	3861	KRT14
	4867	NPHP1
	138050	HGSNAT
	5205	ATP8B1
	7287	TULP1
	91147	TMEM67
	100506866	TTN-AS1
	1869	E2F1
	2737	GLI3
	5563	PRKAA2
	10452	TOMM40
	407018	MIR27A
	4036	LRP2
	5320	PLA2G2A
	406982	MIR20A
	8809	IL18R1
	1363	CPE
	197	AHSG
	7020	TFAP2A
	2932	GSK3B
	3708	ITPR1
	406921	MIR132
	1302	COL11A2
	3811	KIR3DL1
	5286	PIK3C2A
	1571	CYP2E1
	23435	TARDBP
	79152	FA2H
	2167	FABP4
	5582	PRKCG
	6326	SCN2A
	3303	HSPA1A
	10019	SH2B3
	100534595	HNRNPUL2-BSCL2
	5879	RAC1
	8898	MTMR2
	10984	KCNQ1OT1
	166379	BBS12
	56652	TWNK
	6392	SDHD
	3308	HSPA4
	10000	AKT3
	5310	PKD1
	7376	NR1H2
	4973	OLR1
	5820	PVT1
	776	CACNA1D
	51094	ADIPOR1
	1832	DSP
	64127	NOD2
	10333	TLR6
	2623	GATA1
	406937	MIR145
	81846	SBF2
	7170	TPM3
	6464	SHC1
	2695	GIP
	8878	SQSTM1
	3122	HLA-DRA
	4254	KITLG
	7431	VIM
	3614	IMPDH1
	6607	SMN2
	6523	SLC5A1
	7297	TYK2
	5122	PCSK1
	5144	PDE4D
	252995	FNDC5
	7291	TWIST1
	145226	RDH12
	5744	PTHLH
	581	BAX
	23503	ZFYVE26
	84823	LMNB2
	4988	OPRM1
	79738	BBS10
	7809	BSND
	3737	KCNA2
	5919	RARRES2
	5126	PCSK2
	1184	CLCN5
	9896	FIG4
	4853	NOTCH2
	7052	TGM2
	3320	HSP90AA1
	10075	HUWE1
	6094	ROM1
	23418	CRB1
	4915	NTRK2
	7010	TEK
	63892	THADA
	10594	PRPF8
	5562	PRKAA1
	3309	HSPA5
	16	AARS1
	7839	LEPQTL1
	203228	C9orf72
	5354	PLP1
	4575	TRNS2
	1272	CNTN1
	9049	AIP
	1258	CNGB1
	3567	IL5
	1769	DNAH8
	7474	WNT5A
	2153	F5
	941	CD80
	3060	HCRT
	6236	RRAD
	54551	MAGEL2
	3852	KRT5
	4153	MBL2
	9241	NOG
	55157	DARS2
	942	CD86
	1816	DRD5
	7076	TIMP1
	79602	ADIPOR2
	4938	OAS1
	5771	PTPN2
	5156	PDGFRA
	407007	MIR222
	6662	SOX9
	196	AHR
	2324	FLT4
	778	CACNA1F
	1991	ELANE
	3600	IL15
	23516	SLC39A14
	4688	NCF2
	3419	IDH3A
	834	CASP1
	55532	SLC30A10
	142	PARP1
	93986	FOXP2
	64805	P2RY12
	3827	KNG1
	5308	PITX2
	486	FXYD2
	120892	LRRK2
	1161	ERCC8
	5155	PDGFB
	22954	TRIM32
	2626	GATA4
	6198	RPS6KB1
	1187	CLCNKA
	7043	TGFB3
	84649	DGAT2
	1482	NKX2-5
	8872	CDC123
	4540	ND5
	3284	HSD3B2
	1244	ABCC2
	124590	USH1G
	3035	HARS1
	6496	SIX3
	8195	MKKS
	9388	LIPG
	26291	FGF21
	2152	F3
	23175	LPIN1
	7681	MKRN3
	54968	TMEM70
	64116	SLC39A8
	779	CACNA1S
	80704	SLC19A3
	2630	GBAP1
	379	ARL4D
	7050	TGIF1
	11128	POLR3A
	388939	PCARE
	10804	GJB6
	23081	KDM4C
	3549	IHH
	2271	FH
	1584	CYP11B1
	5697	PYY
	81704	DOCK8
	3718	JAK3
	55212	BBS7
	4825	NKX6-1
	28514	DLL1
	9401	RECQL4
	574501	MIR499A
	1289	COL5A1
	27031	NPHP3
	1021	CDK6
	5566	PRKACA
	6017	RLBP1
	5111	PCNA
	5967	REG1A
	6310	ATXN1
	26121	PRPF31
	8682	PEA15
	1788	DNMT3A
	55908	ANGPTL8
	5228	PGF
	1734	DIO2
	51284	TLR7
	1508	CTSB
	5982	RFC2
	6352	CCL5
	6678	SPARC
	3170	FOXA2
	212	ALAS2
	5626	PROP1
	346007	EYS
	1282	COL4A1
	949	SCARB1
	5742	PTGS1
	9742	IFT140
	100048912	CDKN2B-AS1
	3146	HMGB1
	8788	DLK1
	51067	YARS2
	774	CACNA1B
	23400	ATP13A2
	2625	GATA3
	2185	PTK2B
	5467	PPARD
	2159	F10
	100151683	RNU4ATAC
	2248	FGF3
	5076	PAX2
	25	ABL1
	26278	SACS
	8862	APLN
	2512	FTL
	4012	LNPEP
	5476	CTSA
	1909	EDNRA
	6908	TBP
	7424	VEGFC
	5333	PLCD1
	239	ALOX12
	285	ANGPT2
	5105	PCK1
	4613	MYCN
	8691	IDDM17
	79955	PDZD7
	26160	IFT172
	930	CD19
	2110	ETFDH
	6340	SCNN1G
	84919	PPP1R15B
	617	BCS1L
	3570	IL6R
	7879	RAB7A
	57539	WDR35
	5244	ABCB4
	4287	ATXN3
	6555	SLC10A2
	3414	IDDM15
	133	ADM
	2524	FUT2
	3405	IDDM6
	51057	WDPCP
	268	AMH
	129880	BBS5
	10059	DNM1L
	374654	KIF7
	695	BTK
	3592	IL12A
	50717	DCAF8
	6721	SREBF2
	7012	TERC
	6863	TAC1
	1301	COL11A1
	6527	SLC5A4
	4091	SMAD6
	2554	GABRA1
	3992	FADS1
	64324	NSD1
	1103	CHAT
	7274	TTPA
	3975	LHX1
	10002	NR2E3
	1259	CNGA1
	51422	PRKAG2
	4948	OCA2
	3766	KCNJ10
	3075	CFH
	7546	ZIC2
	1066	CES1
	3175	ONECUT1
	5564	PRKAB1
	2516	NR5A1
	3420	IDH3B
	4340	MOG
	23410	SIRT3
	7827	NPHS2
	407006	MIR221
	4536	ND2
	5009	OTC
	10911	UTS2
	51324	SPG21
	375298	CERKL
	3312	HSPA8
	10461	MERTK
	5896	RAG1
	9377	COX5A
	55600	ITLN1
	6820	SULT2B1
	3897	L1CAM
	100271697	IDDM23
	100303715	IDDM24
	1051	CEBPB
	22943	DKK1
	71	ACTG1
	80025	PANK2
	4692	NDN
	4040	LRP6
	3002	GZMB
	65018	PINK1
	8913	CACNA1G
	6391	SDHC
	10661	KLF1
	23586	DDX58
	9997	SCO2
	1284	COL4A2
	2194	FASN
	6834	SURF1
	2201	FBN2
	4072	EPCAM
	9217	VAPB
	11315	PARK7
	2081	ERN1
	2202	EFEMP1
	5644	PRSS1
	176	ACAN
	4922	NTS
	2264	FGFR4
	162514	TRPV3
	3920	LAMP2
	3070	HELLS
	598	BCL2L1
	5196	PF4
	157657	C8orf37
	2132	EXT2
	4558	TRNF
	378884	NHLRC1
	3030	HADHA
	2010	EMD
	4151	MB
	238	ALK
	5539	PPY
	22	ABCB7
	5321	PLA2G4A
	6658	SOX3
	50484	RRM2B
	7083	TK1
	3251	HPRT1
	540	ATP7B
	4534	MTM1
	2735	GLI1
	54982	CLN6
	57044	IDDM18
	952	CD38
	7077	TIMP2
	51311	TLR8
	1431	CS
	1270	CNTF
	4564	TRNH
	4901	NRL
	3984	LIMK1
	50507	NOX4
	4255	MGMT
	57217	TTC7A
	91754	NEK9
	538	ATP7A
	6440	SFTPC
	5172	SLC26A4
	9365	KL
	5524	PTPA
	90	ACVR1
	407055	MIR99A
	145264	SERPINA12
	3778	KCNMA1
	57165	GJC2
	29126	CD274
	7037	TFRC
	55971	BAIAP2L1
	57545	CC2D2A
	9516	LITAF
	9990	SLC12A6
	6446	SGK1
	3848	KRT1
	5669	PSG1
	34	ACADM
	6776	STAT5A
	350	APOH
	1308	COL17A1
	10577	NPC2
	50940	PDE11A
	2944	GSTM1
	3110	MNX1
	4598	MVK
	6567	SLC16A2
	2619	GAS1
	2067	ERCC1
	3423	IDS
	2068	ERCC2
	51129	ANGPTL4
	25814	ATXN10
	10397	NDRG1
	57818	G6PC2
	6515	SLC2A3
	5034	P4HB
	84984	CEP19
	406971	MIR195
	56980	PRDM10
	51339	DACT1
	10699	CORIN
	4683	NBN
	3382	ICA1
	9569	GTF2IRD1
	55240	STEAP3
	26227	PHGDH
	2050	EPHB4
	3242	HPD
	9031	BAZ1B
	1581	CYP7A1
	1509	CTSD
	440275	EIF2AK4
	7374	UNG
	407053	MIR96
	1789	DNMT3B
	407034	MIR30E
	8718	TNFRSF25
	27241	BBS9
	6649	SOD3
	8820	HESX1
	6507	SLC1A3
	23600	AMACR
	5296	PIK3R2
	3798	KIF5A
	81793	TLR10
	116	ADCYAP1
	969	CD69
	5140	PDE3B
	1375	CPT1B
	1804	DPP6
	886	CCKAR
	2175	FANCA
	60509	AGBL5
	1716	DGUOK
	6447	SCG5
	8517	IKBKG
	25939	SAMHD1
	7345	UCHL1
	1410	CRYAB
	403	ARL3
	1113	CHGA
	10013	HDAC6
	6506	SLC1A2
	8792	TNFRSF11A
	51062	ATL1
	1180	CLCN1
	4744	NEFH
	80207	OPA3
	659	BMPR2
	83550	GPR101
	190	NR0B1
	10628	TXNIP
	6319	SCD
	1437	CSF2
	4001	LMNB1
	22933	SIRT2
	1446	CSN1S1
	5631	PRPS1
	9197	SLC33A1
	2692	GHRHR
	3440	IFNA2
	2296	FOXC1
	51091	SEPSECS
	32	ACACB
	406935	MIR143
	7222	TRPC3
	2739	GLO1
	92482	BBIP1
	5341	PLEK
	4728	NDUFS8
	7026	NR2F2
	56997	COQ8A
	6591	SNAI2
	894	CCND2
	57492	ARID1B
	8743	TNFSF10
	27235	COQ2
	2717	GLA
	10468	FST
	2309	FOXO3
	487	ATP2A1
	26047	CNTNAP2
	84233	TMEM126A
	6389	SDHA
	55812	SPATA7
	5190	PEX6
	2934	GSN
	4361	MRE11
	967	CD63
	2305	FOXM1
	4615	MYD88
	10133	OPTN
	4548	MTR
	4092	SMAD7
	4158	MC2R
	182	JAG1
	5087	PBX1
	4644	MYO5A
	134	ADORA1
	1017	CDK2
	9897	WASHC5
	4574	TRNS1
	6338	SCNN1B
	4099	MAG
	1436	CSF1R
	3135	HLA-G
	407004	MIR22
	6532	SLC6A4
	406974	MIR197
	133522	PPARGC1B
	27130	INVS
	406976	MIR199A1
	5170	PDPK1
	5657	PRTN3
	23405	DICER1
	50937	CDON
	151306	GPBAR1
	5371	PML
	6315	ATXN8OS
	407029	MIR30A
	5422	POLA1
	290	ANPEP
	2979	GUCA1B
	4976	OPA1
	5897	RAG2
	10518	CIB2
	777	CACNA1E
	1759	DNM1
	1440	CSF3
	760	CA2
	91662	NLRP12
	1294	COL7A1
	2520	GAST
	476	ATP1A1
	1824	DSC2
	23312	DMXL2
	1717	DHCR7
	6548	SLC9A1
	4968	OGG1
	1116	CHI3L1
	7389	UROD
	8795	TNFRSF10B
	5654	HTRA1
	50939	IMPG2
	54704	PDP1
	11232	POLG2
	9619	ABCG1
	6288	SAA1
	341	APOC1
	79659	DYNC2H1
	151056	PLB1
	51684	SUFU
	112476	PRRT2
	9101	USP8
	1644	DDC
	2691	GHRH
	4043	LRPAP1
	3842	TNPO1
	406	ARNTL
	762	CA4
	3426	CFI
	546	ATRX
	5587	PRKD1
	5830	PEX5
	6521	SLC4A1
	6935	ZEB1
	9429	ABCG2
	79798	ARMC5
	2255	FGF10
	270	AMPD1
	5664	PSEN2
	7461	CLIP2
	7448	VTN
	2170	FABP3
	4842	NOS1
	2696	GIPR
	65266	WNK4
	6595	SMARCA2
	8200	GDF5
	445	ASS1
	547	KIF1A
	2707	GJB3
	406967	MIR192
	9381	OTOF
	4093	SMAD9
	2660	MSTN
	65055	REEP1
	5077	PAX3
	3490	IGFBP7
	91574	C12orf65
	4869	NPM1
	10423	CDIPT
	29110	TBK1
	7849	PAX8
	1896	EDA
	5020	OXT
	6997	TDGF1
	953	ENTPD1
	1545	CYP1B1
	1181	CLCN2
	51119	SBDS
	7200	TRH
	261734	NPHP4
	7057	THBS1
	686	BTD
	8797	TNFRSF10A
	2304	FOXE1
	79947	DHDDS
	284	ANGPT1
	3108	HLA-DMA
	2180	ACSL1
	4703	NEB
	406906	MIR122
	501	ALDH7A1
	92579	G6PC3
	55636	CHD7
	9404	LPXN
	406954	MIR181A2
	5424	POLD1
	5591	PRKDC
	6683	SPAST
	4488	MSX2
	23495	TNFRSF13B
	3109	HLA-DMB
	960	CD44
	3456	IFNB1
	30835	CD209
	6598	SMARCB1
	23111	SPART
	80168	MOGAT2
	362	AQP5
	59272	ACE2
	5913	RAPSN
	4779	NFE2L1
	406996	MIR214
	149775	GNAS-AS1
	22852	ANKRD26
	51218	GLRX5
	10273	STUB1
	11020	IFT27
	6569	SLC34A1
	79577	CDC73
	3587	IL10RA
	8565	YARS1
	494324	MIR375
	5148	PDE6G
	6590	SLPI
	3659	IRF1
	79583	TMEM231
	57704	GBA2
	3691	ITGB4
	9414	TJP2
	6102	RP2
	2950	GSTP1
	6901	TAZ
	6285	S100B
	10913	EDAR
	2322	FLT3
	1908	EDN3
	9129	PRPF3
	2969	GTF2I
	10806	SDCCAG8
	4604	MYBPC1
	4552	MTRR
	55090	MED9
	4882	NPR2
	5191	PEX7
	26090	ABHD12
	1201	CLN3
	51168	MYO15A
	3673	ITGA2
	26608	TBL2
	83737	ITCH
	5915	RARB
	128674	PROKR2
	9935	MAFB
	5449	POU1F1
	5175	PECAM1
	11190	CEP250
	10749	KIF1C
	92211	CDHR1
	4724	NDUFS4
	249	ALPL
	407035	MIR31
	1843	DUSP1
	5329	PLAUR
	646486	FABP12
	406948	MIR15A
	3932	LCK
	7852	CXCR4
	51548	SIRT6
	79728	PALB2
	140803	TRPM6
	1296	COL8A2
	914	CD2
	728441	GGT2
	65992	DDRGK1
	7078	TIMP3
	1111	CHEK1
	6712	SPTBN2
	6710	SPTB
	5192	PEX10
	28976	ACAD9
	347	APOD
	5601	MAPK9
	10	NAT2
	85300	ATCAY
	3930	LBR
	1844	DUSP2
	5609	MAP2K7
	134218	DNAJC21
	1298	COL9A2
	153	ADRB1
	2235	FECH
	8029	CUBN
	284252	KCTD1
	4159	MC3R
	4087	SMAD2
	1261	CNGA3
	861	RUNX1
	57038	RARS2
	3084	NRG1
	2101	ESRRA
	2272	FHIT
	5605	MAP2K2
	23345	SYNE1
	25794	FSCN2
	768206	PRCD
	987	LRBA
	2719	GPC3
	23019	CNOT1
	11284	PNKP
	3000	GUCY2D
	84976	DISP1
	81839	VANGL1
	3350	HTR1A
	341640	FREM2
	127534	GJB4
	2864	FFAR1
	60674	GAS5
	5069	PAPPA
	8228	PNPLA4
	842	CASP9
	139760	GPR119
	8139	GAN
	6100	RP9
	3661	IRF3
	495	ATP4A
	3913	LAMB2
	406972	MIR196A1
	9150	CTDP1
	6654	SOS1
	23409	SIRT4
	4537	ND3
	7045	TGFBI
	200894	ARL13B
	8513	LIPF
	9420	CYP7B1
	162417	NAGS
	4908	NTF3
	983	CDK1
	7337	UBE3A
	7275	TUB
	64421	DCLRE1C
	8452	CUL3
	5818	NECTIN1
	572	BAD
	57761	TRIB3
	406924	MIR134
	2624	GATA2
	11253	MAN1B1
	4838	NODAL
	1855	DVL1
	10653	SPINT2
	79809	TTC21B
	64170	CARD9
	23038	WDTC1
	10155	TRIM28
	60681	FKBP10
	23568	ARL2BP
	406955	MIR181B1
	406903	MIR10B
	11343	MGLL
	9817	KEAP1
	6008	RHEBP1
	7471	WNT1
	2057	EPOR
	10664	CTCF
	7112	TMPO
	7128	TNFAIP3
	5189	PEX1
	11277	TREX1
	4729	NDUFV2
	113235	SLC46A1
	6499	SKIV2L
	53335	BCL11A
	5173	PDYN
	3508	IGHMBP2
	100507436	MICA
	23025	UNC13A
	55023	PHIP
	3752	KCND3
	2558	GABRA5
	8091	HMGA2
	91252	SLC39A13
	364	AQP7
	7072	TIA1
	5581	PRKCE
	3125	HLA-DRB3
	23590	PDSS1
	174	AFP
	2034	EPAS1
	406942	MIR150
	57338	JPH3
	51569	UFM1
	3653	IPW
	64218	SEMA4A
	3858	KRT10
	80347	COASY
	84140	FAM161A
	9368	SLC9A3R1
	23193	GANAB
	658	BMPR1B
	6550	SLC9A3
	545	ATR
	165	AEBP1
	23742	NPAP1
	5660	PSAP
	158	ADSL
	332	BIRC5
	7187	TRAF3
	791114	PWRN1
	4322	MMP13
	1738	DLD
	80199	FUZ
	8928	FOXH1
	6007	RHD
	2888	GRB14
	11093	ADAMTS13
	10785	WDR4
	2517	FUCA1
	3918	LAMC2
	1938	EEF2
	4358	MPV17
	2318	FLNC
	1605	DAG1
	54888	NSUN2
	28389	IGHV4-38-2
	4594	MMUT
	2138	EYA1
	57379	AICDA
	23347	SMCHD1
	2593	GAMT
	387	RHOA
	10580	SORBS1
	406984	MIR200B
	3973	LHCGR
	54585	LZTFL1
	117531	TMC1
	655	BMP7
	5149	PDE6H
	4210	MEFV
	8243	SMC1A
	400916	CHCHD10
	9829	DNAJC6
	6473	SHOX
	23408	SIRT5
	23592	LEMD3
	4627	MYH9
	407011	MIR23B
	286053	NSMCE2
	55975	KLHL7
	7846	TUBA1A
	5970	RELA
	5315	PKM
	57728	WDR19
	24140	FTSJ1
	9215	LARGE1
	7454	WAS
	84131	CEP78
	5166	PDK4
	51651	PTRH2
	2072	ERCC4
	3064	HTT
	7225	TRPC6
	2334	AFF2
	2122	MECOM
	5048	PAFAH1B1
	6011	GRK1
	8526	DGKE
	23235	SIK2
	7442	TRPV1
	83715	ESPN
	1285	COL4A3
	406985	MIR200C
	494335	MIR423
	4297	KMT2A
	330	BIRC3
	26585	GREM1
	4578	TRNW
	80224	NUBPL
	5408	PNLIPRP2
	103	ADAR
	7169	TPM2
	3688	ITGB1
	3716	JAK1
	9839	ZEB2
	1287	COL4A5
	7306	TYRP1
	3118	HLA-DQA2
	4719	NDUFS1
	2767	GNA11
	57678	GPAM
	6999	TDO2
	6233	RPS27A
	2562	GABRB3
	81	ACTN4
	406983	MIR200A
	7432	VIP
	2867	FFAR2
	5336	PLCG2
	1495	CTNNA1
	7051	TGM1
	49855	SCAPER
	4170	MCL1
	2904	GRIN2B
	406978	MIR199B
	406959	MIR183
	60401	EDA2R
	3687	ITGAX
	8988	HSPB3
	9780	PIEZO1
	7153	TOP2A
	706	TSPO
	91942	NDUFAF2
	338557	FFAR4
	79689	STEAP4
	9326	ZNHIT3
	161497	STRC
	57107	PDSS2
	378938	MALAT1
	54714	CNGB3
	4572	TRNQ
	406950	MIR16-1
	10210	TOPORS
	2885	GRB2
	406987	MIR204
	338433	SNORD115-1
	274	BIN1
	1814	DRD3
	5241	PGR
	7007	TECTA
	2876	GPX1
	1118	CHIT1
	9663	LPIN2
	279	AMY2A
	1497	CTNS
	3868	KRT16
	10516	FBLN5
	406953	MIR18A
	10312	TCIRG1
	51547	SIRT7
	4481	MSR1
	9517	SPTLC2
	1191	CLU
	4649	MYO9A
	368	ABCC6
	284086	NEK8
	10528	NOP56
	6804	STX1A
	23395	LARS2
	5407	PNLIPRP1
	406940	MIR148A
	728226	GGTLC3
	4952	OCRL
	406886	MIRLET7D
	594857	NPS
	9051	PSTPIP1
	23224	SYNE2
	2822	GPLD1
	494336	MIR424
	79092	CARD14
	57010	CABP4
	79648	MCPH1
	8773	SNAP23
	6775	STAT4
	7507	XPA
	1942	EFNA1
	871	SERPINH1
	4751	NEK2
	1352	COX10
	3674	ITGA2B
	1528	CYB5A
	406933	MIR141
	25914	RTTN
	8654	PDE5A
	1965	EIF2S1
	2523	FUT1
	54949	SDHAF2
	1500	CTNND1
	411	ARSB
	1736	DKC1
	80776	B9D2
	1815	DRD4
	2290	FOXG1
	130557	ZNF513
	5745	PTH1R
	406958	MIR182
	145624	PWAR1
	406919	MIR130A
	3855	KRT7
	5053	PAH
	1958	EGR1
	406927	MIR136
	10243	GPHN
	4694	NDUFA1
	4026	LPP
	4684	NCAM1
	7504	XK
	3133	HLA-E
	5264	PHYH
	1621	DBH
	51004	COQ6
	407050	MIR93
	4750	NEK1
	407020	MIR28
	100033819	MIR675
	3909	LAMA3
	3562	IL3
	80173	IFT74
	8837	CFLAR
	100033413	SNORD116-1
	60529	ALX4
	693120	MIR33B
	7403	KDM6A
	2058	EPRS1
	442893	MIR151A
	1373	CPS1
	2896	GRN
	7161	TP73
	6305	SBF1
	11155	LDB3
	23203	PMPCA
	79048	SECISBP2
	1447	CSN2
	1674	DES
	57096	RPGRIP1
	10108	MKRN3-AS1
	83636	C19orf12
	8289	ARID1A
	6299	SALL1
	257	ALX3
	407039	MIR33A
	2903	GRIN2A
	6530	SLC6A2
	11160	ERLIN2
	6092	ROBO2
	2071	ERCC3
	406949	MIR15B
	5319	PLA2G1B
	5079	PAX5
	1967	EIF2B1
	80331	DNAJC5
	2212	FCGR2A
	9094	UNC119
	1641	DCX
	407	ARR3
	23274	CLEC16A
	51124	IER3IP1
	22995	CEP152
	5314	PKHD1
	3020	H3-3A
	55651	NHP2
	1441	CSF3R
	55572	FOXRED1
	657	BMPR1A
	7480	WNT10B
	2177	FANCD2
	84504	NKX6-2
	79644	SRD5A3
	6041	RNASEL
	2150	F2RL1
	113179	ADAT3
	3270	HRC
	64581	CLEC7A
	440823	MIAT
	3577	CXCR1
	80746	TSEN2
	1000	CDH2
	26154	ABCA12
	5460	POU5F1
	128178	EDARADD
	3658	IREB2
	1147	CHUK
	721	C4B
	10367	MICU1
	59067	IL21
	23230	VPS13A
	3875	KRT18
	2120	ETV6
	4891	SLC11A2
	2026	ENO2
	755	CFAP410
	1543	CYP1A1
	4295	MLN
	7150	TOP1
	5747	PTK2
	23746	AIPL1
	4624	MYH6
	9518	GDF15
	407024	MIR29B1
	259266	ASPM
	3163	HMOX2
	8622	PDE8B
	1634	DCN
	3574	IL7
	358	AQP1
	947	CD34
	55863	TMEM126B
	818	CAMK2G
	55755	CDK5RAP2
	3748	KCNC3
	57674	RNF213
	9734	HDAC9
	53343	NUDT9
	5627	PROS1
	284098	PIGW
	286826	LIN9
	406916	MIR128-2
	25805	BAMBI
	4053	LTBP2
	4723	NDUFV1
	3127	HLA-DRB5
	649	BMP1
	5995	RGR
	58	ACTA1
	1591	CYP24A1
	25778	DSTYK
	4653	MYOC
	23020	SNRNP200
	80055	PGAP1
	154288	KHDC3L
	57570	TRMT5
	8313	AXIN2
	149233	IL23R
	4014	LORICRIN
	8085	KMT2D
	5521	PPP2R2B
	9907	AP5Z1
	6866	TAC3
	5828	PEX2
	55620	STAP2
	147007	TMEM199
	8434	RECK
	4720	NDUFS2
	6653	SORL1
	84684	INSM2
	9313	MMP20
	2639	GCDH
	5245	PHB
	5649	RELN
	56606	SLC2A9
	11152	WDR45
	8312	AXIN1
	48	ACO1
	5446	PON3
	6899	TBX1
	6571	SLC18A2
	494331	MIR382
	3188	HNRNPH2
	118813	ZFYVE27
	6752	SSTR2
	6949	TCOF1
	3872	KRT17
	55654	TMEM127
	5645	PRSS2
	3786	KCNQ3
	79867	TCTN2
	3914	LAMB3
	7502	XIC
	123606	NIPA1
	2168	FABP1
	3860	KRT13
	6584	SLC22A5
	2911	GRM1
	10686	CLDN16
	2203	FBP1
	7476	WNT7A
	2073	ERCC5
	4722	NDUFS3
	109	ADCY3
	682	BSG
	7137	TNNI3
	27077	B9D1
	1968	EIF2S3
	79797	ZNF408
	2176	FANCC
	2978	GUCA1A
	4117	MAK
	7952	TNDM
	406986	MIR203A
	114803475	LOC114803475
	693159	MIR574
	100131814	LINC00271
	2535	FZD2
	4191	MDH2
	50964	SOST
	89891	DYNC2I2
	3052	HCCS
	167691	LCA5
	492	ATP2B3
	338917	VSX2
	7080	NKX2-1
	117581	TWIST2
	51214	IGF2-AS
	1257	CNC2
	1828	DSG1
	406966	MIR191
	60675	PROK2
	1435	CSF1
	2672	GFI1
	1149	CIDEA
	6492	SIM1
	2780	GNAT2
	5095	PCCA
	1003	CDH5
	9342	SNAP29
	2531	KDSR
	57194	ATP10A
	3155	HMGCL
	56244	BTNL2
	55764	IFT122
	56616	DIABLO
	83394	PITPNM3
	2567	GABRG3
	2117	ETV3
	288	ANK3
	199713	NLRP7
	1728	NQO1
	2776	GNAQ
	60506	NYX
	23236	PLCB1
	6815	STYX
	407010	MIR23A
	57017	COQ9
	65250	CPLANE1
	84666	RETNLB
	4645	MYO5B
	4316	MMP7
	3703	STT3A
	256471	MFSD8
	6427	SRSF2
	2743	GLRB
	26249	KLHL3
	25886	POC1A
	79140	CCDC28B
	4942	OAT
	23607	CD2AP
	4509	ATP8
	7156	TOP3A
	875	CBS
	80201	HKDC1
	406988	MIR205
	3455	IFNAR2
[truncated: 1,330 more rows]
