# Supplementary material for: Use of Network Pharmacology to Explore the Mechanism of Gegen (Puerariae lobatae Radix) in the Treatment of Type 2 Diabetes Mellitus Associated with Hyperlipidemia
Source: Evid Based Complement Alternat Med. 2021 Apr 16;2021:6633402. doi: 10.1155/2021/6633402 (PMC8068526; doi:10.1155/2021/6633402)
Supplement: Supplementary Materials — include the following. Supplementary Material 1: active ingredients and targets of Gegen. Supplementary Material 2: targets of type 2 diabetes and hyperlipidemia. Supplementary Material 3: results of GO and KEGG enrichment. Supplementary Material 4: topological parameters of the compound-target-pathway network. [file 6633402.f1.zip › 6633402.f1/3GO and KEGG Enrichment.txt]

GO-BP	ID	Description	GeneRatio	BgRatio	pvalue	p.adjust	qvalue	geneID	Count
	GO:0008202	steroid metabolic process	0.34375	0.017728977	6.03E-23	1.75E-19	8.16E-20	185/231/335/338/847/1066/1588/1591/1576/2099/2539/3156/3290/3553/3949/9971/5444/5467/6256/6647/6721/7124	22
	GO:0031667	response to nutrient levels	0.34375	0.02672737	4.44E-19	4.17E-16	1.94E-16	154/335/847/1591/1956/2155/2539/3156/3162/3553/3949/5595/9971/5444/5465/5467/5468/5617/6647/6652/6721/7412	22
	GO:0006066	alcohol metabolic process	0.3125	0.01981789	4.64E-19	4.17E-16	1.94E-16	231/217/335/338/847/1066/1576/1798/2539/3156/3553/3949/9971/5444/5467/6256/6647/6652/6721/7124	20
	GO:0050727	regulation of inflammatory response	0.3125	0.020032137	5.73E-19	4.17E-16	1.94E-16	185/335/1588/1956/2099/2167/3553/3569/3630/3949/4318/10062/9971/5465/5467/5468/6401/6647/7099/7124	20
	GO:0010876	lipid localization	0.3125	0.022228174	4.40E-18	2.56E-15	1.19E-15	185/335/338/1066/1588/2169/2167/3553/3569/3949/7376/10062/9971/5444/5465/5467/5468/6256/6721/7124	20
	GO:0019216	regulation of lipid metabolic process	0.296875	0.021960364	7.22E-17	3.50E-14	1.63E-14	185/335/338/1019/3156/3553/3630/3949/7376/10062/9971/5465/5467/5468/5747/6256/6647/6721/7124	19
	GO:1905952	regulation of lipid localization	0.21875	0.008355651	1.49E-16	6.20E-14	2.89E-14	185/335/338/1588/3553/3569/7376/10062/5444/5465/5467/5468/6721/7124	14
	GO:1902652	secondary alcohol metabolic process	0.21875	0.00862346	2.34E-16	8.50E-14	3.96E-14	335/338/847/1066/1576/2539/3156/3949/9971/5444/5467/6256/6647/6721	14
	GO:0016125	sterol metabolic process	0.21875	0.008891269	3.61E-16	1.07E-13	5.00E-14	335/338/847/1066/1588/2539/3156/3949/9971/5444/5467/6256/6647/6721	14
	GO:0006869	lipid transport	0.28125	0.020353508	3.69E-16	1.07E-13	5.00E-14	185/335/338/1066/1588/2169/2167/3553/3949/7376/10062/9971/5444/5465/5467/5468/6256/6721	18
	GO:0019915	lipid storage	0.171875	0.003642207	4.09E-16	1.08E-13	5.04E-14	335/338/3553/3569/7376/10062/5465/5467/5468/6721/7124	11
	GO:0008203	cholesterol metabolic process	0.203125	0.00803428	3.17E-15	7.68E-13	3.58E-13	335/338/847/1066/2539/3156/3949/9971/5444/5467/6256/6647/6721	13
	GO:0006694	steroid biosynthetic process	0.21875	0.010498125	3.74E-15	8.36E-13	3.89E-13	231/335/338/1066/1588/1576/2539/3156/3290/3553/9971/6647/6721/7124	14
	GO:1901653	cellular response to peptide	0.265625	0.020621318	8.85E-15	1.84E-12	8.56E-13	154/185/231/1019/2641/2645/2690/3553/3630/3643/3718/9971/5468/5617/5747/7099/7412	17
	GO:0032496	response to lipopolysaccharide	0.25	0.017675415	1.43E-14	2.78E-12	1.29E-12	338/6347/1019/3553/3569/5595/4846/7376/10062/9971/5467/6401/6403/7099/7124/7412	16
	GO:0002237	response to molecule of bacterial origin	0.25	0.018371719	2.61E-14	4.75E-12	2.21E-12	338/6347/1019/3553/3569/5595/4846/7376/10062/9971/5467/6401/6403/7099/7124/7412	16
	GO:0010883	regulation of lipid storage	0.140625	0.002463846	3.63E-14	6.21E-12	2.89E-12	338/3569/7376/10062/5465/5467/5468/6721/7124	9
	GO:0010885	regulation of cholesterol storage	0.109375	0.00085699	4.43E-14	7.15E-12	3.33E-12	338/7376/10062/5465/5467/5468/6721	7
	GO:0045834	positive regulation of lipid metabolic process	0.1875	0.007820032	7.67E-14	1.17E-11	5.47E-12	185/335/3553/3630/3949/7376/10062/9971/5465/5468/5747/7124	12
	GO:0046890	regulation of lipid biosynthetic process	0.203125	0.010605249	1.18E-13	1.70E-11	7.90E-12	335/338/1019/3156/3553/3630/3949/7376/10062/9971/6647/6721/7124	13
	GO:0010878	cholesterol storage	0.109375	0.000964114	1.22E-13	1.70E-11	7.90E-12	338/7376/10062/5465/5467/5468/6721	7
	GO:0010888	negative regulation of lipid storage	0.109375	0.001017675	1.93E-13	2.56E-11	1.19E-11	3569/7376/10062/5465/5467/5468/7124	7
	GO:0016042	lipid catabolic process	0.234375	0.017836101	3.11E-13	3.94E-11	1.83E-11	335/338/1019/1066/1588/1591/1576/2169/2167/3553/3630/3949/5465/5467/7124	15
	GO:0007584	response to nutrient	0.203125	0.011730048	4.32E-13	5.23E-11	2.44E-11	335/847/1591/1956/2155/3156/3162/3553/9971/5467/5468/6647/7412	13
	GO:0062012	regulation of small molecule metabolic process	0.25	0.02297804	8.15E-13	9.48E-11	4.41E-11	338/2645/3156/3553/3630/3643/3949/4846/7376/10062/9971/5465/5468/6647/6721/7124	16
	GO:0043434	response to peptide hormone	0.25	0.023352973	1.04E-12	1.17E-10	5.43E-11	185/847/1019/2155/2641/2645/2690/3553/3630/3643/3718/9971/5465/5468/5617/5747	16
	GO:0062013	positive regulation of small molecule metabolic process	0.171875	0.007552223	1.62E-12	1.75E-10	8.14E-11	2645/3553/3630/3643/4846/7376/10062/9971/5465/5468/7124	11
	GO:0015850	organic hydroxy compound transport	0.203125	0.014033208	4.23E-12	4.29E-10	2.00E-10	185/335/338/1066/1588/3949/7376/10062/9971/5444/5468/6256/6721	13
	GO:0032102	negative regulation of response to external stimulus	0.234375	0.021424746	4.35E-12	4.29E-10	2.00E-10	335/6347/1588/3156/3630/3949/4846/7376/10062/9971/5327/5465/5467/5468/6647	15
	GO:0071222	cellular response to lipopolysaccharide	0.1875	0.010980182	4.43E-12	4.29E-10	2.00E-10	6347/1019/3553/3569/5595/4846/7376/10062/9971/5467/7099/7124	12
	GO:1901617	organic hydroxy compound biosynthetic process	0.203125	0.014247456	5.12E-12	4.80E-10	2.24E-10	231/335/338/1066/1588/1576/2539/3156/3553/9971/6647/6721/7124	13
	GO:0071219	cellular response to molecule of bacterial origin	0.1875	0.011355115	6.58E-12	5.98E-10	2.78E-10	6347/1019/3553/3569/5595/4846/7376/10062/9971/5467/7099/7124	12
	GO:0062197	cellular response to chemical stress	0.21875	0.018746652	1.05E-11	9.25E-10	4.31E-10	231/847/1956/2539/3162/3569/3630/5595/4318/4846/5468/6647/7099/7124	14
	GO:0019218	regulation of steroid metabolic process	0.15625	0.006641671	1.29E-11	1.11E-09	5.15E-10	185/335/338/3156/3553/3949/9971/6647/6721/7124	10
	GO:0003018	vascular process in circulatory system	0.171875	0.009373326	1.73E-11	1.40E-09	6.51E-10	154/185/1956/3156/3162/3569/3630/4846/5467/6647/7422	11
	GO:0046165	alcohol biosynthetic process	0.171875	0.009373326	1.73E-11	1.40E-09	6.51E-10	231/335/338/1066/1576/2539/3156/3553/6647/6721/7124	11
	GO:0071216	cellular response to biotic stimulus	0.1875	0.0126406	2.31E-11	1.82E-09	8.47E-10	6347/1019/3553/3569/5595/4846/7376/10062/9971/5467/7099/7124	12
	GO:1905953	negative regulation of lipid localization	0.125	0.003267274	3.09E-11	2.37E-09	1.10E-09	3569/7376/10062/5465/5467/5468/6721/7124	8
	GO:0006367	transcription initiation from RNA polymerase II promoter	0.171875	0.01006963	3.76E-11	2.81E-09	1.31E-09	1019/2099/2100/7376/10062/9971/2908/5465/5467/5468/6256	11
	GO:0006352	DNA-templated transcription, initiation	0.1875	0.013336904	4.32E-11	3.14E-09	1.46E-09	1019/2099/2100/5595/7376/10062/9971/2908/5465/5467/5468/6256	12
	GO:0071375	cellular response to peptide hormone stimulus	0.203125	0.017193358	5.39E-11	3.82E-09	1.78E-09	185/1019/2641/2645/2690/3553/3630/3643/3718/9971/5468/5617/5747	13
	GO:0055088	lipid homeostasis	0.15625	0.008087841	9.24E-11	6.40E-09	2.98E-09	335/338/2167/3630/3949/7376/10062/9971/5468/6721	10
	GO:0001101	response to acid chemical	0.203125	0.018371719	1.22E-10	8.28E-09	3.86E-09	231/338/847/1019/1956/2155/3949/9971/5444/5468/6256/7124/7422	13
	GO:0015918	sterol transport	0.140625	0.005998929	1.52E-10	1.00E-08	4.66E-09	335/338/1066/3949/7376/10062/5444/5468/6721	9
	GO:0030522	intracellular receptor signaling pathway	0.1875	0.014890198	1.55E-10	1.00E-08	4.66E-09	1591/2099/2100/7376/10062/9971/2908/5465/5467/5468/6256/7099	12
	GO:0051090	regulation of DNA-binding transcription factor activity	0.21875	0.023138725	1.71E-10	1.08E-08	5.02E-09	268/847/2099/2100/3162/3553/3569/3630/5595/9971/5468/7099/7124/7422	14
	GO:0050728	negative regulation of inflammatory response	0.15625	0.009051955	2.81E-10	1.74E-08	8.10E-09	335/1588/3630/3949/10062/9971/5465/5467/5468/6647	10
	GO:1905954	positive regulation of lipid localization	0.125	0.004392073	3.54E-10	2.15E-08	9.99E-09	335/338/1588/3553/7376/10062/5444/6721	8
	GO:0014066	regulation of phosphatidylinositol 3-kinase signaling	0.140625	0.006641671	3.80E-10	2.25E-08	1.05E-08	847/1956/3630/3643/5595/5467/5747/6403/7124	9
	GO:0034599	cellular response to oxidative stress	0.1875	0.016175683	4.00E-10	2.33E-08	1.08E-08	847/1956/2539/3162/3569/3630/5595/4318/4846/6647/7099/7124	12
	GO:0032368	regulation of lipid transport	0.140625	0.006695233	4.08E-10	2.33E-08	1.08E-08	185/335/1588/3553/7376/10062/5444/5468/6721	9
	GO:0002718	regulation of cytokine production involved in immune response	0.125	0.004499197	4.31E-10	2.36E-08	1.10E-08	335/3162/3553/3569/3718/5595/7099/7124	8
	GO:0046889	positive regulation of lipid biosynthetic process	0.125	0.004499197	4.31E-10	2.36E-08	1.10E-08	335/3553/3630/3949/7376/10062/9971/7124	8
	GO:0006631	fatty acid metabolic process	0.203125	0.020514194	4.75E-10	2.51E-08	1.17E-08	240/1066/1564/1576/3553/3630/5595/7376/10062/5444/5465/5467/5468	13
	GO:0048545	response to steroid hormone	0.203125	0.020514194	4.75E-10	2.51E-08	1.17E-08	1956/2099/2100/3569/7376/10062/9971/2908/5465/5467/5468/6256/7124	13
	GO:0031348	negative regulation of defense response	0.171875	0.012801285	4.92E-10	2.56E-08	1.19E-08	335/1588/3630/3949/7376/10062/9971/5465/5467/5468/6647	11
	GO:0046879	hormone secretion	0.1875	0.016497054	5.01E-10	2.56E-08	1.19E-08	185/1588/1956/2641/2645/3156/3553/3569/3630/9971/5467/7124	12
	GO:0050708	regulation of protein secretion	0.21875	0.0252812	5.42E-10	2.72E-08	1.27E-08	335/1956/2641/2645/3156/3553/3569/3630/5595/10062/9971/5467/7099/7124	14
	GO:0043401	steroid hormone mediated signaling pathway	0.15625	0.009748259	5.81E-10	2.86E-08	1.33E-08	2099/2100/7376/10062/9971/2908/5465/5467/5468/6256	10
	GO:0009914	hormone transport	0.1875	0.016979111	6.96E-10	3.37E-08	1.57E-08	185/1588/1956/2641/2645/3156/3553/3569/3630/9971/5467/7124	12
	GO:0010743	regulation of macrophage derived foam cell differentiation	0.09375	0.001606856	7.10E-10	3.39E-08	1.58E-08	185/338/7376/10062/5465/5468	6
	GO:0071383	cellular response to steroid hormone stimulus	0.171875	0.013283342	7.28E-10	3.41E-08	1.59E-08	1956/2099/2100/7376/10062/9971/2908/5465/5467/5468/6256	11
	GO:0002791	regulation of peptide secretion	0.21875	0.026780932	1.14E-09	5.28E-08	2.46E-08	335/1956/2641/2645/3156/3553/3569/3630/5595/10062/9971/5467/7099/7124	14
	GO:0097755	positive regulation of blood vessel diameter	0.109375	0.00316015	1.18E-09	5.35E-08	2.49E-08	154/1956/3162/3630/4846/5467/6647	7
	GO:0051091	positive regulation of DNA-binding transcription factor activity	0.171875	0.013979646	1.25E-09	5.58E-08	2.60E-08	268/847/2099/2100/3553/3569/3630/5468/7099/7124/7422	11
	GO:0042632	cholesterol homeostasis	0.125	0.005141939	1.27E-09	5.59E-08	2.60E-08	335/338/2167/3949/7376/10062/9971/6721	8
	GO:0046883	regulation of hormone secretion	0.171875	0.014033208	1.30E-09	5.64E-08	2.63E-08	185/1588/1956/2641/2645/3156/3553/3630/9971/5467/7124	11
	GO:0035296	regulation of tube diameter	0.140625	0.007659347	1.36E-09	5.72E-08	2.66E-08	154/185/1956/3156/3162/3630/4846/5467/6647	9
	GO:0097746	regulation of blood vessel diameter	0.140625	0.007659347	1.36E-09	5.72E-08	2.66E-08	154/185/1956/3156/3162/3630/4846/5467/6647	9
	GO:0055092	sterol homeostasis	0.125	0.005195501	1.38E-09	5.73E-08	2.67E-08	335/338/2167/3949/7376/10062/9971/6721	8
	GO:0035150	regulation of tube size	0.140625	0.007712908	1.44E-09	5.91E-08	2.75E-08	154/185/1956/3156/3162/3630/4846/5467/6647	9
	GO:0030301	cholesterol transport	0.125	0.005302625	1.63E-09	6.57E-08	3.06E-08	335/338/1066/3949/7376/10062/5444/6721	8
	GO:0050714	positive regulation of protein secretion	0.171875	0.01435458	1.65E-09	6.57E-08	3.06E-08	1956/2641/2645/3553/3569/3630/5595/9971/5467/7099/7124	11
	GO:0051047	positive regulation of secretion	0.203125	0.022924478	1.83E-09	7.13E-08	3.32E-08	1588/1956/2641/2645/3553/3569/3630/5595/9971/5467/5617/7099/7124	13
	GO:0014065	phosphatidylinositol 3-kinase signaling	0.140625	0.007927156	1.84E-09	7.13E-08	3.32E-08	847/1956/3630/3643/5595/5467/5747/6403/7124	9
	GO:0046686	response to cadmium ion	0.109375	0.003374397	1.89E-09	7.23E-08	3.37E-08	847/1956/3162/5595/4318/6647/6652	7
	GO:0048608	reproductive structure development	0.203125	0.023085163	1.99E-09	7.53E-08	3.51E-08	268/1588/1956/2099/3643/5595/4846/5467/5468/5747/6256/6647/7422	13
	GO:0002367	cytokine production involved in immune response	0.125	0.00546331	2.07E-09	7.70E-08	3.59E-08	335/3162/3553/3569/3718/5595/7099/7124	8
	GO:0061458	reproductive system development	0.203125	0.023245849	2.17E-09	7.98E-08	3.71E-08	268/1588/1956/2099/3643/5595/4846/5467/5468/5747/6256/6647/7422	13
	GO:0010742	macrophage derived foam cell differentiation	0.09375	0.001928227	2.29E-09	8.24E-08	3.84E-08	185/338/7376/10062/5465/5468	6
	GO:0090077	foam cell differentiation	0.09375	0.001928227	2.29E-09	8.24E-08	3.84E-08	185/338/7376/10062/5465/5468	6
	GO:0006641	triglyceride metabolic process	0.125	0.005623996	2.60E-09	9.24E-08	4.30E-08	335/338/847/2169/2167/3949/7376/10062	8
	GO:0072593	reactive oxygen species metabolic process	0.171875	0.015211569	3.03E-09	1.06E-07	4.94E-08	185/847/1956/2539/3553/3630/3643/4846/6647/7099/7124	11
	GO:0010038	response to metal ion	0.1875	0.019389395	3.12E-09	1.08E-07	5.04E-08	673/847/1019/1956/2167/2539/3162/5595/4318/6647/6652/7412	12
	GO:0002793	positive regulation of peptide secretion	0.171875	0.015425817	3.50E-09	1.20E-07	5.58E-08	1956/2641/2645/3553/3569/3630/5595/9971/5467/7099/7124	11
	GO:0048660	regulation of smooth muscle cell proliferation	0.140625	0.009051955	5.92E-09	2.00E-07	9.33E-08	231/1956/3156/3162/3569/4318/5467/5468/7124	9
	GO:0009755	hormone-mediated signaling pathway	0.15625	0.012479914	6.35E-09	2.10E-07	9.77E-08	2099/2100/7376/10062/9971/2908/5465/5467/5468/6256	10
	GO:0042445	hormone metabolic process	0.15625	0.012479914	6.35E-09	2.10E-07	9.77E-08	231/335/1066/1588/1576/2099/2690/3290/3553/7124	10
	GO:0006695	cholesterol biosynthetic process	0.109375	0.00401714	6.56E-09	2.12E-07	9.88E-08	335/338/1066/2539/3156/6647/6721	7
	GO:0048659	smooth muscle cell proliferation	0.140625	0.009159079	6.57E-09	2.12E-07	9.88E-08	231/1956/3156/3162/3569/4318/5467/5468/7124	9
	GO:1902653	secondary alcohol biosynthetic process	0.109375	0.004070702	7.21E-09	2.30E-07	1.07E-07	335/338/1066/2539/3156/6647/6721	7
	GO:0033002	muscle cell proliferation	0.15625	0.012801285	8.10E-09	2.55E-07	1.19E-07	231/1956/3156/3162/3569/4318/5467/5468/6256/7124	10
	GO:0014002	astrocyte development	0.09375	0.002356722	8.14E-09	2.55E-07	1.19E-07	1956/3553/3569/3949/7099/7124	6
	GO:0048871	multicellular organismal homeostasis	0.203125	0.026031066	8.41E-09	2.60E-07	1.21E-07	154/231/1956/2167/3553/3569/4846/7376/10062/6647/7099/7124/7422	13
	GO:0051235	maintenance of location	0.171875	0.016871987	8.89E-09	2.72E-07	1.27E-07	335/338/3553/3569/7376/10062/5465/5467/5468/6721/7124	11
	GO:1903532	positive regulation of secretion by cell	0.1875	0.021585431	1.04E-08	3.14E-07	1.46E-07	1588/1956/2641/2645/3553/3569/3630/5595/9971/5467/7099/7124	12
	GO:0042180	cellular ketone metabolic process	0.15625	0.013176219	1.07E-08	3.20E-07	1.49E-07	231/1588/3156/3553/3630/7376/10062/9971/5465/5468	10
	GO:0048015	phosphatidylinositol-mediated signaling	0.140625	0.009694697	1.08E-08	3.20E-07	1.49E-07	847/1956/3630/3643/5595/5467/5747/6403/7124	9
	GO:0016126	sterol biosynthetic process	0.109375	0.004338511	1.13E-08	3.29E-07	1.53E-07	335/338/1066/2539/3156/6647/6721	7
	GO:0048708	astrocyte differentiation	0.109375	0.004338511	1.13E-08	3.29E-07	1.53E-07	1956/3553/3569/3949/5595/7099/7124	7
	GO:0050900	leukocyte migration	0.203125	0.02672737	1.15E-08	3.32E-07	1.54E-07	338/6347/1588/2155/3162/3553/3569/5595/6401/6403/7124/7412/7422	13
	GO:0061614	pri-miRNA transcription by RNA polymerase II	0.09375	0.002517408	1.23E-08	3.48E-07	1.62E-07	2908/5465/5467/5468/5617/6721	6
	GO:0030072	peptide hormone secretion	0.15625	0.013390466	1.24E-08	3.48E-07	1.62E-07	1956/2641/2645/3156/3553/3569/3630/9971/5467/7124	10
	GO:0048017	inositol lipid-mediated signaling	0.140625	0.009855383	1.25E-08	3.48E-07	1.62E-07	847/1956/3630/3643/5595/5467/5747/6403/7124	9
	GO:0006639	acylglycerol metabolic process	0.125	0.00690948	1.34E-08	3.70E-07	1.72E-07	335/338/847/2169/2167/3949/7376/10062	8
	GO:0006638	neutral lipid metabolic process	0.125	0.006963042	1.42E-08	3.89E-07	1.81E-07	335/338/847/2169/2167/3949/7376/10062	8
	GO:0032147	activation of protein kinase activity	0.171875	0.017836101	1.58E-08	4.29E-07	2.00E-07	154/1956/2690/3553/3630/3643/5595/6647/7099/7124/7422	11
	GO:0070542	response to fatty acid	0.109375	0.00460632	1.72E-08	4.64E-07	2.16E-07	338/847/1019/3949/9971/5444/5468	7
	GO:0007565	female pregnancy	0.140625	0.010283878	1.80E-08	4.81E-07	2.24E-07	231/2099/3553/5595/4318/5467/5617/6256/6647	9
	GO:0014068	positive regulation of phosphatidylinositol 3-kinase signaling	0.109375	0.004659882	1.87E-08	4.95E-07	2.30E-07	847/3630/3643/5467/5747/6403/7124	7
	GO:0071496	cellular response to external stimulus	0.171875	0.018157472	1.90E-08	4.97E-07	2.31E-07	1591/1956/3162/3553/5595/9971/5468/6647/6721/7099/7412	11
	GO:2000377	regulation of reactive oxygen species metabolic process	0.140625	0.010444563	2.06E-08	5.36E-07	2.50E-07	185/1956/2539/3553/3630/3643/6647/7099/7124	9
	GO:0002685	regulation of leukocyte migration	0.140625	0.010498125	2.16E-08	5.55E-07	2.59E-07	6347/1588/2155/3162/3569/5595/6403/7124/7422	9
	GO:0048732	gland development	0.1875	0.023245849	2.36E-08	5.96E-07	2.77E-07	335/1588/1956/2099/3162/3643/5595/5617/6256/6647/7124/7422	12
	GO:0002700	regulation of production of molecular mediator of immune response	0.125	0.007445099	2.40E-08	5.96E-07	2.77E-07	335/3162/3553/3569/3718/5595/7099/7124	8
	GO:0006720	isoprenoid metabolic process	0.125	0.007445099	2.40E-08	5.96E-07	2.77E-07	231/335/338/1576/1798/1956/3156/5467	8
	GO:0048638	regulation of developmental growth	0.171875	0.018585967	2.41E-08	5.96E-07	2.77E-07	154/1019/2539/2690/3643/5465/5467/5617/5747/6647/7422	11
	GO:0002683	negative regulation of immune system process	0.1875	0.023299411	2.42E-08	5.96E-07	2.77E-07	335/6347/1588/3162/3630/3718/3949/7376/10062/5468/7099/7124	12
	GO:0051222	positive regulation of protein transport	0.1875	0.02356722	2.74E-08	6.70E-07	3.12E-07	1956/2641/2645/3553/3569/3630/5595/9971/5467/6721/7099/7124	12
	GO:0050994	regulation of lipid catabolic process	0.09375	0.002892341	2.90E-08	7.03E-07	3.27E-07	1019/3553/3630/3949/5465/7124	6
	GO:0048143	astrocyte activation	0.078125	0.00144617	3.07E-08	7.39E-07	3.44E-07	1956/3553/3569/3949/7124	5
	GO:0050810	regulation of steroid biosynthetic process	0.109375	0.005088377	3.46E-08	8.25E-07	3.84E-07	338/3156/3553/9971/6647/6721/7124	7
	GO:0006979	response to oxidative stress	0.1875	0.024156401	3.59E-08	8.46E-07	3.94E-07	847/1956/2539/3162/3569/3630/5595/4318/4846/6647/7099/7124	12
	GO:0090276	regulation of peptide hormone secretion	0.140625	0.011140868	3.60E-08	8.46E-07	3.94E-07	1956/2641/2645/3156/3553/3630/9971/5467/7124	9
	GO:0031331	positive regulation of cellular catabolic process	0.171875	0.019389395	3.71E-08	8.60E-07	4.00E-07	154/3162/3553/3569/3630/3643/3949/5595/5465/5747/7124	11
	GO:0008585	female gonad development	0.109375	0.005141939	3.72E-08	8.60E-07	4.00E-07	268/1588/2099/3643/4846/6647/7422	7
	GO:0033344	cholesterol efflux	0.09375	0.003053026	4.04E-08	9.22E-07	4.29E-07	335/338/7376/10062/5444/6721	6
	GO:1904951	positive regulation of establishment of protein localization	0.1875	0.02442421	4.06E-08	9.22E-07	4.29E-07	1956/2641/2645/3553/3569/3630/5595/9971/5467/6721/7099/7124	12
	GO:0060191	regulation of lipase activity	0.109375	0.005249063	4.30E-08	9.69E-07	4.51E-07	185/335/1956/2099/7376/10062/6401	7
	GO:0050777	negative regulation of immune response	0.125	0.00803428	4.35E-08	9.74E-07	4.54E-07	335/3162/3630/3718/7376/10062/5468/7124	8
	GO:0031663	lipopolysaccharide-mediated signaling pathway	0.09375	0.003106588	4.49E-08	9.94E-07	4.63E-07	6347/3553/5595/4846/7099/7124	6
	GO:0006909	phagocytosis	0.171875	0.019764328	4.51E-08	9.94E-07	4.63E-07	335/6347/3553/3949/5595/10062/5468/5747/6647/7099/7124	11
	GO:0042063	gliogenesis	0.15625	0.015532941	5.06E-08	1.10E-06	5.14E-07	6347/1956/3553/3569/3949/5595/5468/6647/7099/7124	10
	GO:0050729	positive regulation of inflammatory response	0.125	0.008194965	5.08E-08	1.10E-06	5.14E-07	185/1956/2167/3553/3569/3949/7099/7124	8
	GO:0046545	development of primary female sexual characteristics	0.109375	0.005409748	5.30E-08	1.13E-06	5.28E-07	268/1588/2099/3643/4846/6647/7422	7
	GO:0048661	positive regulation of smooth muscle cell proliferation	0.109375	0.005409748	5.30E-08	1.13E-06	5.28E-07	231/1956/3156/3162/3569/4318/7124	7
	GO:0010001	glial cell differentiation	0.140625	0.011676486	5.40E-08	1.15E-06	5.34E-07	1956/3553/3569/3949/5595/5468/6647/7099/7124	9
	GO:2000379	positive regulation of reactive oxygen species metabolic process	0.109375	0.00546331	5.68E-08	1.20E-06	5.57E-07	185/1956/3553/3643/6647/7099/7124	7
	GO:0032370	positive regulation of lipid transport	0.09375	0.003267274	6.12E-08	1.28E-06	5.96E-07	335/1588/3553/7376/10062/5444	6
	GO:0044706	multi-multicellular organism process	0.140625	0.011890734	6.31E-08	1.31E-06	6.11E-07	231/2099/3553/5595/4318/5467/5617/6256/6647	9
	GO:0032371	regulation of sterol transport	0.09375	0.003374397	7.45E-08	1.53E-06	7.10E-07	335/7376/10062/5444/5468/6721	6
	GO:0090181	regulation of cholesterol metabolic process	0.09375	0.003374397	7.45E-08	1.53E-06	7.10E-07	338/3156/3949/9971/6647/6721	6
	GO:0010745	negative regulation of macrophage derived foam cell differentiation	0.0625	0.000696304	8.77E-08	1.78E-06	8.31E-07	7376/10062/5465/5468	4
	GO:0000302	response to reactive oxygen species	0.140625	0.012426352	9.20E-08	1.86E-06	8.66E-07	847/1956/3162/3569/5595/4318/4846/6647/7124	9
	GO:0050766	positive regulation of phagocytosis	0.09375	0.003695769	1.29E-07	2.59E-06	1.21E-06	335/6347/3553/5468/6647/7124	6
	GO:0046660	female sex differentiation	0.109375	0.006159614	1.30E-07	2.59E-06	1.21E-06	268/1588/2099/3643/4846/6647/7422	7
	GO:0001659	temperature homeostasis	0.125	0.009266202	1.32E-07	2.60E-06	1.21E-06	154/2167/3553/7376/10062/7099/7124/7422	8
	GO:0021782	glial cell development	0.109375	0.006213176	1.38E-07	2.71E-06	1.26E-06	1956/3553/3569/3949/6647/7099/7124	7
	GO:0019318	hexose metabolic process	0.140625	0.013069095	1.41E-07	2.76E-06	1.29E-06	231/2539/2645/3630/3643/5465/5467/6652/7124	9
	GO:0038083	peptidyl-tyrosine autophosphorylation	0.078125	0.001981789	1.62E-07	3.09E-06	1.44E-06	1956/3643/5595/5747/7422	5
	GO:0045923	positive regulation of fatty acid metabolic process	0.078125	0.001981789	1.62E-07	3.09E-06	1.44E-06	3553/7376/10062/5465/5468	5
	GO:0071276	cellular response to cadmium ion	0.078125	0.001981789	1.62E-07	3.09E-06	1.44E-06	1956/3162/5595/4318/6647	5
	GO:0030730	sequestering of triglyceride	0.0625	0.000803428	1.67E-07	3.14E-06	1.46E-06	3553/5465/5468/7124	4
	GO:0045073	regulation of chemokine biosynthetic process	0.0625	0.000803428	1.67E-07	3.14E-06	1.46E-06	3162/3553/3569/7124	4
	GO:0060193	positive regulation of lipase activity	0.09375	0.003856454	1.67E-07	3.14E-06	1.46E-06	185/1956/2099/7376/10062/6401	6
	GO:0031100	animal organ regeneration	0.09375	0.003910016	1.82E-07	3.39E-06	1.58E-06	335/1019/1956/2155/3162/5468	6
	GO:0060416	response to growth hormone	0.078125	0.002035351	1.86E-07	3.44E-06	1.60E-06	2155/2690/3718/5617/5747	5
	GO:0009896	positive regulation of catabolic process	0.171875	0.022763792	1.88E-07	3.45E-06	1.61E-06	154/3162/3553/3569/3630/3643/3949/5595/5465/5747/7124	11
	GO:0071902	positive regulation of protein serine/threonine kinase activity	0.15625	0.017889663	1.89E-07	3.45E-06	1.61E-06	154/1956/2690/3553/3643/5595/6647/7099/7124/7422	10
	GO:0008217	regulation of blood pressure	0.125	0.009748259	1.94E-07	3.53E-06	1.64E-06	154/185/1066/3162/4846/5465/5468/6647	8
	GO:1903409	reactive oxygen species biosynthetic process	0.109375	0.006534547	1.95E-07	3.53E-06	1.64E-06	3553/3630/3643/4846/6647/7099/7124	7
	GO:0043405	regulation of MAP kinase activity	0.15625	0.018050348	2.05E-07	3.68E-06	1.72E-06	1956/2690/3156/3553/3643/5595/6647/7099/7124/7422	10
	GO:0010874	regulation of cholesterol efflux	0.078125	0.002088913	2.12E-07	3.77E-06	1.75E-06	335/7376/10062/5444/6721	5
	GO:0001960	negative regulation of cytokine-mediated signaling pathway	0.09375	0.00401714	2.14E-07	3.77E-06	1.75E-06	335/3569/7376/10062/9971/5468	6
	GO:0150076	neuroinflammatory response	0.09375	0.00401714	2.14E-07	3.77E-06	1.75E-06	1956/3553/3569/3949/4318/7124	6
	GO:0010875	positive regulation of cholesterol efflux	0.0625	0.00085699	2.22E-07	3.84E-06	1.79E-06	335/7376/10062/5444	4
	GO:0042033	chemokine biosynthetic process	0.0625	0.00085699	2.22E-07	3.84E-06	1.79E-06	3162/3553/3569/7124	4
	GO:0050755	chemokine metabolic process	0.0625	0.00085699	2.22E-07	3.84E-06	1.79E-06	3162/3553/3569/7124	4
	GO:0043406	positive regulation of MAP kinase activity	0.140625	0.013818961	2.27E-07	3.91E-06	1.82E-06	1956/2690/3553/3643/5595/6647/7099/7124/7422	9
	GO:0050673	epithelial cell proliferation	0.171875	0.023245849	2.32E-07	3.96E-06	1.85E-06	185/335/6347/1956/2099/3162/5467/5468/5617/7124/7422	11
	GO:0046887	positive regulation of hormone secretion	0.109375	0.006802357	2.57E-07	4.37E-06	2.04E-06	1588/1956/2641/2645/3630/9971/5467	7
	GO:0019932	second-messenger-mediated signaling	0.171875	0.023513658	2.60E-07	4.39E-06	2.05E-06	154/185/1956/2641/3630/4846/6401/6403/7124/7412/7422	11
	GO:0060759	regulation of response to cytokine stimulus	0.125	0.010176754	2.70E-07	4.54E-06	2.11E-06	335/3569/7376/10062/9971/5468/7099/7124	8
	GO:0150077	regulation of neuroinflammatory response	0.078125	0.002196036	2.75E-07	4.57E-06	2.13E-06	3553/3569/3949/4318/7124	5
	GO:1902893	regulation of pri-miRNA transcription by RNA polymerase II	0.078125	0.002196036	2.75E-07	4.57E-06	2.13E-06	2908/5465/5467/5617/6721	5
	GO:0001935	endothelial cell proliferation	0.125	0.010230316	2.81E-07	4.64E-06	2.16E-06	185/335/6347/3162/5468/5617/7124/7422	8
	GO:0043491	protein kinase B signaling	0.140625	0.014408141	3.23E-07	5.30E-06	2.47E-06	6347/1956/2099/2155/3553/3630/3643/5747/7124	9
	GO:0060761	negative regulation of response to cytokine stimulus	0.09375	0.004338511	3.39E-07	5.51E-06	2.57E-06	335/3569/7376/10062/9971/5468	6
	GO:1902930	regulation of alcohol biosynthetic process	0.09375	0.004338511	3.39E-07	5.51E-06	2.57E-06	338/3156/3553/6647/6721/7124	6
	GO:0006775	fat-soluble vitamin metabolic process	0.078125	0.00230316	3.51E-07	5.68E-06	2.65E-06	1591/1576/3553/5467/7124	5
	GO:0032868	response to insulin	0.140625	0.014568827	3.54E-07	5.69E-06	2.65E-06	847/1019/2645/3553/3630/3643/9971/5465/5468	9
	GO:0032642	regulation of chemokine production	0.09375	0.004392073	3.65E-07	5.83E-06	2.72E-06	3162/3553/3569/9971/7099/7124	6
	GO:0006766	vitamin metabolic process	0.109375	0.00717729	3.70E-07	5.89E-06	2.74E-06	1591/1576/3553/4552/5467/6256/7124	7
	GO:0006006	glucose metabolic process	0.125	0.01092662	4.64E-07	7.34E-06	3.42E-06	2539/2645/3630/3643/5465/5467/6652/7124	8
	GO:0042446	hormone biosynthetic process	0.09375	0.00460632	4.85E-07	7.62E-06	3.55E-06	231/1588/1576/3290/3553/7124	6
	GO:0002673	regulation of acute inflammatory response	0.078125	0.002463846	4.97E-07	7.77E-06	3.62E-06	3553/3569/3630/5468/7124	5
	GO:0050709	negative regulation of protein secretion	0.109375	0.007552223	5.23E-07	8.14E-06	3.79E-06	335/3156/3553/3630/10062/9971/7124	7
	GO:0005996	monosaccharide metabolic process	0.140625	0.015372255	5.56E-07	8.58E-06	4.00E-06	231/2539/2645/3630/3643/5465/5467/6652/7124	9
	GO:0071229	cellular response to acid chemical	0.125	0.01119443	5.58E-07	8.58E-06	4.00E-06	338/1019/1956/3949/9971/5468/7124/7422	8
	GO:0032602	chemokine production	0.09375	0.004767006	5.94E-07	9.10E-06	4.24E-06	3162/3553/3569/9971/7099/7124	6
	GO:1903531	negative regulation of secretion by cell	0.125	0.011355115	6.21E-07	9.46E-06	4.41E-06	335/3156/3162/3553/3630/10062/9971/7124	8
	GO:0009410	response to xenobiotic stimulus	0.140625	0.015640064	6.42E-07	9.73E-06	4.53E-06	1066/1564/1576/1956/2155/2690/2908/5468/6647	9
	GO:0046364	monosaccharide biosynthetic process	0.09375	0.00487413	6.78E-07	1.02E-05	4.76E-06	231/2539/2645/3630/5465/6652	6
	GO:0070374	positive regulation of ERK1 and ERK2 cascade	0.125	0.011515801	6.91E-07	1.04E-05	4.82E-06	673/6347/1956/2641/3156/5595/7099/7124	8
	GO:0048511	rhythmic process	0.140625	0.01580075	6.99E-07	1.04E-05	4.86E-06	268/1019/1956/2099/2155/4846/10062/5465/5468	9
	GO:0002792	negative regulation of peptide secretion	0.109375	0.007927156	7.26E-07	1.07E-05	4.99E-06	335/3156/3553/3630/10062/9971/7124	7
	GO:0061041	regulation of wound healing	0.109375	0.007927156	7.26E-07	1.07E-05	4.99E-06	2155/3156/4846/5327/5467/6403/7099	7
	GO:0033273	response to vitamin	0.09375	0.004981253	7.71E-07	1.13E-05	5.28E-06	847/1591/1956/2155/5467/5468	6
	GO:0070372	regulation of ERK1 and ERK2 cascade	0.140625	0.016068559	8.04E-07	1.18E-05	5.47E-06	673/6347/1956/2641/3156/3553/5595/7099/7124	9
	GO:0007566	embryo implantation	0.078125	0.002731655	8.40E-07	1.22E-05	5.66E-06	3553/4318/5467/6256/6647	5
	GO:0050999	regulation of nitric-oxide synthase activity	0.078125	0.002731655	8.40E-07	1.22E-05	5.66E-06	1956/3553/3630/4846/7124	5
	GO:0070482	response to oxygen levels	0.15625	0.021103374	8.58E-07	1.24E-05	5.75E-06	847/1019/2155/3162/5327/5465/5467/5468/7412/7422	10
	GO:0000187	activation of MAPK activity	0.109375	0.008141403	8.69E-07	1.24E-05	5.77E-06	2690/3553/3643/5595/6647/7099/7124	7
	GO:0001890	placenta development	0.109375	0.008141403	8.69E-07	1.24E-05	5.77E-06	1956/5595/5467/5468/5747/6256/6647	7
	GO:0042359	vitamin D metabolic process	0.0625	0.001178361	8.77E-07	1.24E-05	5.79E-06	1591/1576/3553/7124	4
	GO:0060326	cell chemotaxis	0.140625	0.016282807	8.98E-07	1.27E-05	5.90E-06	185/6347/1588/2155/3553/3569/5595/7412/7422	9
	GO:0019217	regulation of fatty acid metabolic process	0.09375	0.005141939	9.30E-07	1.30E-05	6.06E-06	3553/3630/7376/10062/5465/5468	6
	GO:0090277	positive regulation of peptide hormone secretion	0.09375	0.005141939	9.30E-07	1.30E-05	6.06E-06	1956/2641/2645/3630/9971/5467	6
	GO:0009895	negative regulation of catabolic process	0.140625	0.016497054	1.00E-06	1.39E-05	6.49E-06	1956/3156/3162/3553/3630/5465/5747/7077/7124	9
	GO:0022407	regulation of cell-cell adhesion	0.15625	0.021531869	1.03E-06	1.43E-05	6.64E-06	335/6347/3553/3569/3718/5465/5747/7124/7412/7422	10
	GO:0050764	regulation of phagocytosis	0.09375	0.005249063	1.05E-06	1.45E-05	6.73E-06	335/6347/3553/5468/6647/7124	6
	GO:0032373	positive regulation of sterol transport	0.0625	0.001231923	1.06E-06	1.45E-05	6.73E-06	335/7376/10062/5444	4
	GO:0032376	positive regulation of cholesterol transport	0.0625	0.001231923	1.06E-06	1.45E-05	6.73E-06	335/7376/10062/5444	4
	GO:0001894	tissue homeostasis	0.125	0.012265667	1.11E-06	1.51E-05	7.02E-06	154/231/1956/3569/4846/6647/7099/7422	8
	GO:0034612	response to tumor necrosis factor	0.140625	0.016711302	1.11E-06	1.51E-05	7.02E-06	335/338/6347/2167/5595/9971/6401/7124/7412	9
	GO:0009743	response to carbohydrate	0.125	0.012319229	1.15E-06	1.55E-05	7.20E-06	338/847/2641/2645/3156/3553/9971/5467	8
	GO:0007259	receptor signaling pathway via JAK-STAT	0.109375	0.008516336	1.18E-06	1.58E-05	7.35E-06	231/6347/2690/3569/3718/5617/7124	7
	GO:0097006	regulation of plasma lipoprotein particle levels	0.09375	0.005409748	1.25E-06	1.67E-05	7.79E-06	185/335/338/3162/3949/9971	6
	GO:0097305	response to alcohol	0.125	0.012479914	1.27E-06	1.67E-05	7.79E-06	847/1019/2155/2539/3156/5468/6647/7412	8
	GO:0060396	growth hormone receptor signaling pathway	0.0625	0.001285485	1.27E-06	1.67E-05	7.79E-06	2690/3718/5617/5747	4
	GO:0070371	ERK1 and ERK2 cascade	0.140625	0.016979111	1.27E-06	1.67E-05	7.79E-06	673/6347/1956/2641/3156/3553/5595/7099/7124	9
	GO:0046486	glycerolipid metabolic process	0.15625	0.022174612	1.34E-06	1.76E-05	8.19E-06	335/338/847/2169/2167/3949/7376/10062/9971/5444	10
	GO:0015718	monocarboxylic acid transport	0.109375	0.008730584	1.39E-06	1.81E-05	8.44E-06	2167/3553/9971/5465/5467/5468/6256	7
	GO:0071398	cellular response to fatty acid	0.078125	0.003053026	1.47E-06	1.91E-05	8.91E-06	338/1019/3949/9971/5468	5
	GO:0051048	negative regulation of secretion	0.125	0.012747724	1.48E-06	1.92E-05	8.93E-06	335/3156/3162/3553/3630/10062/9971/7124	8
	GO:0002719	negative regulation of cytokine production involved in immune response	0.0625	0.001339047	1.50E-06	1.92E-05	8.94E-06	335/3162/3718/7124	4
	GO:0050901	leukocyte tethering or rolling	0.0625	0.001339047	1.50E-06	1.92E-05	8.94E-06	6401/6403/7124/7412	4
	GO:0071378	cellular response to growth hormone stimulus	0.0625	0.001339047	1.50E-06	1.92E-05	8.94E-06	2690/3718/5617/5747	4
	GO:0033138	positive regulation of peptidyl-serine phosphorylation	0.09375	0.005623996	1.58E-06	2.00E-05	9.33E-06	673/1956/2641/3569/7124/7422	6
	GO:0032722	positive regulation of chemokine production	0.078125	0.003106588	1.61E-06	2.03E-05	9.43E-06	3162/3553/3569/7099/7124	5
	GO:0061900	glial cell activation	0.078125	0.003106588	1.61E-06	2.03E-05	9.43E-06	1956/3553/3569/3949/7124	5
	GO:0035051	cardiocyte differentiation	0.109375	0.008944831	1.63E-06	2.05E-05	9.54E-06	1956/2539/5595/5465/6256/7412/7422	7
	GO:0034614	cellular response to reactive oxygen species	0.109375	0.008998393	1.70E-06	2.12E-05	9.89E-06	1956/3569/5595/4318/4846/6647/7124	7
	GO:0051341	regulation of oxidoreductase activity	0.09375	0.005731119	1.76E-06	2.18E-05	1.01E-05	185/1956/3553/3630/4846/7124	6
	GO:0001655	urogenital system development	0.140625	0.017675415	1.77E-06	2.18E-05	1.01E-05	185/231/268/847/1588/2099/4318/6256/7422	9
	GO:0097696	receptor signaling pathway via STAT	0.109375	0.009051955	1.77E-06	2.18E-05	1.01E-05	231/6347/2690/3569/3718/5617/7124	7
	GO:0032800	receptor biosynthetic process	0.0625	0.001392608	1.77E-06	2.18E-05	1.01E-05	10062/5465/5468/7124	4
	GO:0002526	acute inflammatory response	0.09375	0.005784681	1.86E-06	2.26E-05	1.05E-05	3553/3569/3630/5468/7124/7412	6
	GO:1904659	glucose transmembrane transport	0.09375	0.005784681	1.86E-06	2.26E-05	1.05E-05	673/3553/3630/3643/5467/7124	6
	GO:0016101	diterpenoid metabolic process	0.09375	0.005891805	2.07E-06	2.50E-05	1.16E-05	231/335/338/1576/1956/5467	6
	GO:0045123	cellular extravasation	0.078125	0.003267274	2.07E-06	2.50E-05	1.16E-05	6347/6401/6403/7124/7412	5
	GO:0007159	leukocyte cell-cell adhesion	0.140625	0.018050348	2.10E-06	2.53E-05	1.18E-05	6347/3553/3569/3718/5465/6401/6403/7124/7412	9
	GO:0032374	regulation of cholesterol transport	0.078125	0.003320836	2.25E-06	2.69E-05	1.25E-05	335/7376/10062/5444/6721	5
	GO:0008645	hexose transmembrane transport	0.09375	0.005998929	2.30E-06	2.73E-05	1.27E-05	673/3553/3630/3643/5467/7124	6
	GO:0001936	regulation of endothelial cell proliferation	0.109375	0.009426888	2.32E-06	2.73E-05	1.27E-05	185/6347/3162/5468/5617/7124/7422	7
	GO:0050796	regulation of insulin secretion	0.109375	0.009426888	2.32E-06	2.73E-05	1.27E-05	2641/2645/3156/3553/9971/5467/7124	7
	GO:0051897	positive regulation of protein kinase B signaling	0.109375	0.009426888	2.32E-06	2.73E-05	1.27E-05	1956/2099/2155/3630/3643/5747/7124	7
	GO:0001959	regulation of cytokine-mediated signaling pathway	0.109375	0.00948045	2.41E-06	2.83E-05	1.32E-05	335/3569/7376/10062/9971/5468/7124	7
	GO:0002688	regulation of leukocyte chemotaxis	0.09375	0.006106052	2.55E-06	2.97E-05	1.38E-05	6347/1588/2155/3569/5595/7422	6
	GO:0015749	monosaccharide transmembrane transport	0.09375	0.006106052	2.55E-06	2.97E-05	1.38E-05	673/3553/3630/3643/5467/7124	6
	GO:1903034	regulation of response to wounding	0.109375	0.009587574	2.60E-06	3.01E-05	1.40E-05	2155/3156/4846/5327/5467/6403/7099	7
	GO:0046503	glycerolipid catabolic process	0.078125	0.003427959	2.63E-06	3.03E-05	1.41E-05	335/338/2169/2167/3949	5
	GO:0060135	maternal process involved in female pregnancy	0.078125	0.003427959	2.63E-06	3.03E-05	1.41E-05	231/2099/5595/5467/6256	5
	GO:0010565	regulation of cellular ketone metabolic process	0.109375	0.009641136	2.69E-06	3.08E-05	1.44E-05	3553/3630/7376/10062/9971/5465/5468	7
	GO:0007263	nitric oxide mediated signal transduction	0.0625	0.001553294	2.80E-06	3.19E-05	1.49E-05	1956/3630/4846/7422	4
	GO:0034219	carbohydrate transmembrane transport	0.09375	0.006213176	2.82E-06	3.21E-05	1.49E-05	673/3553/3630/3643/5467/7124	6
	GO:0032768	regulation of monooxygenase activity	0.078125	0.003481521	2.85E-06	3.22E-05	1.50E-05	1956/3553/3630/4846/7124	5
	GO:0040014	regulation of multicellular organism growth	0.078125	0.003535083	3.07E-06	3.46E-05	1.61E-05	154/1019/2690/5617/6647	5
	GO:0045940	positive regulation of steroid metabolic process	0.0625	0.001606856	3.22E-06	3.61E-05	1.68E-05	185/335/3553/7124	4
	GO:0042108	positive regulation of cytokine biosynthetic process	0.078125	0.003588645	3.31E-06	3.70E-05	1.72E-05	3162/3553/3569/7099/7124	5
	GO:0006721	terpenoid metabolic process	0.09375	0.006427424	3.44E-06	3.83E-05	1.78E-05	231/335/338/1576/1956/5467	6
	GO:0031668	cellular response to extracellular stimulus	0.125	0.01435458	3.59E-06	3.97E-05	1.85E-05	1591/3162/5595/9971/5468/6647/6721/7412	8
	GO:0071248	cellular response to metal ion	0.109375	0.01006963	3.59E-06	3.97E-05	1.85E-05	673/1956/2167/3162/5595/4318/6647	7
	GO:0034381	plasma lipoprotein particle clearance	0.078125	0.003695769	3.83E-06	4.22E-05	1.97E-05	335/338/3162/3949/9971	5
	GO:0018108	peptidyl-tyrosine phosphorylation	0.140625	0.019442957	3.86E-06	4.24E-05	1.97E-05	1956/2690/3569/3643/3718/5595/5747/7124/7422	9
	GO:0018212	peptidyl-tyrosine modification	0.140625	0.019603642	4.13E-06	4.51E-05	2.10E-05	1956/2690/3569/3643/3718/5595/5747/7124/7422	9
	GO:0055094	response to lipoprotein particle	0.0625	0.00171398	4.20E-06	4.58E-05	2.13E-05	3949/5468/6721/7099	4
	GO:0051224	negative regulation of protein transport	0.109375	0.01033744	4.27E-06	4.62E-05	2.15E-05	335/3156/3553/3630/10062/9971/7124	7
	GO:1901654	response to ketone	0.109375	0.01033744	4.27E-06	4.62E-05	2.15E-05	231/1019/1956/2155/10062/2908/5468	7
	GO:0010749	regulation of nitric oxide mediated signal transduction	0.046875	0.000535619	4.53E-06	4.88E-05	2.27E-05	1956/3630/7422	3
	GO:1904950	negative regulation of establishment of protein localization	0.109375	0.010551687	4.89E-06	5.25E-05	2.44E-05	335/3156/3553/3630/10062/9971/7124	7
	GO:0002687	positive regulation of leukocyte migration	0.09375	0.006855919	5.00E-06	5.35E-05	2.49E-05	2155/3569/5595/6403/7124/7422	6
	GO:0031099	regeneration	0.109375	0.010605249	5.06E-06	5.38E-05	2.51E-05	335/1019/1956/2155/3162/5467/5468	7
	GO:0043627	response to estrogen	0.078125	0.003910016	5.07E-06	5.38E-05	2.51E-05	335/2099/2155/3162/5468	5
	GO:0044262	cellular carbohydrate metabolic process	0.125	0.015104446	5.22E-06	5.52E-05	2.57E-05	231/673/2645/3630/3643/8972/5465/6652	8
	GO:0050678	regulation of epithelial cell proliferation	0.140625	0.020246385	5.36E-06	5.65E-05	2.63E-05	185/6347/1956/3162/5467/5468/5617/7124/7422	9
	GO:0071402	cellular response to lipoprotein particle stimulus	0.0625	0.001821103	5.39E-06	5.66E-05	2.64E-05	3949/5468/6721/7099	4
	GO:0031670	cellular response to nutrient	0.078125	0.003963578	5.42E-06	5.67E-05	2.64E-05	1591/3162/9971/5468/6647	5
	GO:0043500	muscle adaptation	0.09375	0.006963042	5.47E-06	5.70E-05	2.65E-05	2539/3162/3553/4846/5465/5747	6
	GO:0002440	production of molecular mediator of immune response	0.125	0.015318693	5.79E-06	6.01E-05	2.80E-05	335/3162/3553/3569/3718/5595/7099/7124	8
	GO:0002701	negative regulation of production of molecular mediator of immune response	0.0625	0.001874665	6.07E-06	6.26E-05	2.91E-05	335/3162/3718/7124	4
	GO:0019433	triglyceride catabolic process	0.0625	0.001874665	6.07E-06	6.26E-05	2.91E-05	335/338/2169/2167	4
	GO:0031349	positive regulation of defense response	0.140625	0.020567756	6.09E-06	6.26E-05	2.91E-05	185/1956/2167/3553/3569/3949/5595/7099/7124	9
	GO:0035265	organ growth	0.109375	0.01092662	6.15E-06	6.30E-05	2.93E-05	1588/2099/2539/5465/5747/6256/6647	7
	GO:0071356	cellular response to tumor necrosis factor	0.125	0.015586502	6.57E-06	6.71E-05	3.12E-05	335/338/6347/2167/5595/9971/7124/7412	8
	GO:0006809	nitric oxide biosynthetic process	0.078125	0.004124264	6.60E-06	6.71E-05	3.12E-05	3553/3643/4846/7099/7124	5
	GO:0030073	insulin secretion	0.109375	0.011087306	6.77E-06	6.86E-05	3.19E-05	2641/2645/3156/3553/9971/5467/7124	7
	GO:0097242	amyloid-beta clearance	0.0625	0.001928227	6.81E-06	6.88E-05	3.20E-05	3156/3643/3949/7124	4
	GO:0016051	carbohydrate biosynthetic process	0.109375	0.011140868	6.99E-06	7.03E-05	3.27E-05	231/2539/2645/3630/3643/5465/6652	7
	GO:0010827	regulation of glucose transmembrane transport	0.078125	0.004177825	7.03E-06	7.05E-05	3.28E-05	673/3553/3630/3643/7124	5
	GO:0046425	regulation of receptor signaling pathway via JAK-STAT	0.09375	0.007337975	7.39E-06	7.39E-05	3.44E-05	231/2690/3569/3718/5617/7124	6
	GO:0050707	regulation of cytokine secretion	0.109375	0.011247991	7.44E-06	7.41E-05	3.45E-05	335/3553/3630/5595/9971/7099/7124	7
	GO:0030193	regulation of blood coagulation	0.078125	0.004231387	7.48E-06	7.43E-05	3.46E-05	2155/4846/5327/6403/7099	5
	GO:1900046	regulation of hemostasis	0.078125	0.004284949	7.96E-06	7.88E-05	3.67E-05	2155/4846/5327/6403/7099	5
	GO:0007586	digestion	0.09375	0.007445099	8.04E-06	7.90E-05	3.68E-05	335/2169/3949/8972/10062/7099	6
	GO:0033135	regulation of peptidyl-serine phosphorylation	0.09375	0.007445099	8.04E-06	7.90E-05	3.68E-05	673/1956/2641/3569/7124/7422	6
	GO:0042368	vitamin D biosynthetic process	0.046875	0.000642742	8.27E-06	8.07E-05	3.76E-05	1576/3553/7124	3
	GO:0045080	positive regulation of chemokine biosynthetic process	0.046875	0.000642742	8.27E-06	8.07E-05	3.76E-05	3162/3553/7124	3
	GO:0010907	positive regulation of glucose metabolic process	0.0625	0.002035351	8.49E-06	8.26E-05	3.85E-05	2645/3630/3643/5465	4
	GO:0071241	cellular response to inorganic substance	0.109375	0.011515801	8.67E-06	8.41E-05	3.92E-05	673/1956/2167/3162/5595/4318/6647	7
	GO:0032869	cellular response to insulin stimulus	0.109375	0.011569363	8.94E-06	8.64E-05	4.02E-05	1019/2645/3553/3630/3643/9971/5468	7
	GO:0046209	nitric oxide metabolic process	0.078125	0.004392073	8.99E-06	8.66E-05	4.03E-05	3553/3643/4846/7099/7124	5
	GO:0008406	gonad development	0.109375	0.011622924	9.21E-06	8.81E-05	4.11E-05	268/1588/2099/3643/4846/6647/7422	7
	GO:0044242	cellular lipid catabolic process	0.109375	0.011622924	9.21E-06	8.81E-05	4.11E-05	335/338/2169/2167/3949/5465/5467	7
	GO:0106106	cold-induced thermogenesis	0.09375	0.007659347	9.46E-06	8.99E-05	4.19E-05	154/2167/7376/10062/7099/7422	6
	GO:0120161	regulation of cold-induced thermogenesis	0.09375	0.007659347	9.46E-06	8.99E-05	4.19E-05	154/2167/7376/10062/7099/7422	6
	GO:0050818	regulation of coagulation	0.078125	0.004499197	1.01E-05	9.59E-05	4.46E-05	2155/4846/5327/6403/7099	5
	GO:1904892	regulation of receptor signaling pathway via STAT	0.09375	0.007820032	1.06E-05	1.00E-04	4.66E-05	231/2690/3569/3718/5617/7124	6
	GO:1901550	regulation of endothelial cell development	0.046875	0.000696304	1.07E-05	1.00E-04	4.66E-05	3553/7124/7422	3
	GO:1903140	regulation of establishment of endothelial barrier	0.046875	0.000696304	1.07E-05	1.00E-04	4.66E-05	3553/7124/7422	3
	GO:0019319	hexose biosynthetic process	0.078125	0.004552758	1.07E-05	1.00E-04	4.66E-05	231/2645/3630/5465/6652	5
	GO:2001057	reactive nitrogen species metabolic process	0.078125	0.004552758	1.07E-05	1.00E-04	4.66E-05	3553/3643/4846/7099/7124	5
	GO:0045137	development of primary sexual characteristics	0.109375	0.011944296	1.10E-05	0.000101919	4.75E-05	268/1588/2099/3643/4846/6647/7422	7
	GO:0045444	fat cell differentiation	0.109375	0.011944296	1.10E-05	0.000101919	4.75E-05	154/2167/3569/3630/5467/5468/7124	7
	GO:0002262	myeloid cell homeostasis	0.09375	0.007873594	1.11E-05	0.000102246	4.76E-05	2539/3162/3569/3718/6647/7422	6
	GO:0030595	leukocyte chemotaxis	0.109375	0.011997858	1.13E-05	0.000104262	4.86E-05	6347/1588/2155/3553/3569/5595/7422	7
	GO:0008643	carbohydrate transport	0.09375	0.007927156	1.15E-05	0.000105613	4.92E-05	673/3553/3630/3643/5467/7124	6
	GO:0001558	regulation of cell growth	0.140625	0.022281735	1.16E-05	0.000105788	4.93E-05	185/1956/2100/2539/3630/5465/5467/5468/7422	9
	GO:0031098	stress-activated protein kinase signaling cascade	0.125	0.016871987	1.17E-05	0.000106719	4.97E-05	231/1956/3156/3553/5595/7099/7124/7422	8
	GO:0051092	positive regulation of NF-kappaB transcription factor activity	0.09375	0.007980718	1.20E-05	0.000108722	5.06E-05	268/847/3553/3630/7099/7124	6
	GO:0046427	positive regulation of receptor signaling pathway via JAK-STAT	0.078125	0.004767006	1.34E-05	0.000121667	5.67E-05	231/2690/3569/5617/7124	5
	GO:0010867	positive regulation of triglyceride biosynthetic process	0.046875	0.000749866	1.36E-05	0.000122596	5.71E-05	3949/7376/10062	3
	GO:0060397	growth hormone receptor signaling pathway via JAK-STAT	0.046875	0.000749866	1.36E-05	0.000122596	5.71E-05	2690/3718/5617	3
	GO:0034383	low-density lipoprotein particle clearance	0.0625	0.00230316	1.40E-05	0.000124679	5.81E-05	338/3162/3949/9971	4
	GO:0045429	positive regulation of nitric oxide biosynthetic process	0.0625	0.00230316	1.40E-05	0.000124679	5.81E-05	3553/3643/7099/7124	4
	GO:0046461	neutral lipid catabolic process	0.0625	0.00230316	1.40E-05	0.000124679	5.81E-05	335/338/2169/2167	4
	GO:0046464	acylglycerol catabolic process	0.0625	0.00230316	1.40E-05	0.000124679	5.81E-05	335/338/2169/2167	4
	GO:1990845	adaptive thermogenesis	0.09375	0.008248527	1.44E-05	0.000128019	5.96E-05	154/2167/7376/10062/7099/7422	6
	GO:0061756	leukocyte adhesion to vascular endothelial cell	0.0625	0.002356722	1.54E-05	0.000135551	6.31E-05	6401/6403/7124/7412	4
	GO:1904407	positive regulation of nitric oxide metabolic process	0.0625	0.002356722	1.54E-05	0.000135551	6.31E-05	3553/3643/7099/7124	4
	GO:0045833	negative regulation of lipid metabolic process	0.078125	0.004927691	1.58E-05	0.000138276	6.44E-05	3553/3630/9971/6647/7124	5
	GO:1904894	positive regulation of receptor signaling pathway via STAT	0.078125	0.004927691	1.58E-05	0.000138276	6.44E-05	231/2690/3569/5617/7124	5
	GO:0035690	cellular response to drug	0.140625	0.023192287	1.59E-05	0.0001389	6.47E-05	1019/1956/3162/3553/3569/5595/2908/6647/7124	9
	GO:0031669	cellular response to nutrient levels	0.109375	0.012694162	1.63E-05	0.00014172	6.60E-05	1591/3162/5595/9971/5468/6647/6721	7
	GO:0032872	regulation of stress-activated MAPK cascade	0.109375	0.012694162	1.63E-05	0.00014172	6.60E-05	1956/3156/3553/5595/7099/7124/7422	7
	GO:1901655	cellular response to ketone	0.078125	0.004981253	1.66E-05	0.000144014	6.71E-05	231/1019/1956/2908/5468	5
	GO:0042362	fat-soluble vitamin biosynthetic process	0.046875	0.000803428	1.70E-05	0.000146519	6.82E-05	1576/3553/7124	3
	GO:0070302	regulation of stress-activated protein kinase signaling cascade	0.109375	0.012801285	1.72E-05	0.000148289	6.91E-05	1956/3156/3553/5595/7099/7124/7422	7
	GO:0050663	cytokine secretion	0.109375	0.012854847	1.77E-05	0.000151698	7.06E-05	335/3553/3630/5595/9971/7099/7124	7
	GO:0060249	anatomical structure homeostasis	0.140625	0.023513658	1.77E-05	0.000151698	7.06E-05	154/231/1956/3569/5595/4846/6647/7099/7422	9
	GO:0042593	glucose homeostasis	0.109375	0.012908409	1.82E-05	0.000155096	7.22E-05	2641/2645/3156/3630/3643/9971/5468	7
	GO:0042116	macrophage activation	0.078125	0.005088377	1.84E-05	0.00015691	7.31E-05	3569/3949/10062/7099/7124	5
	GO:0033500	carbohydrate homeostasis	0.109375	0.012961971	1.87E-05	0.00015836	7.37E-05	2641/2645/3156/3630/3643/9971/5468	7
	GO:0097327	response to antineoplastic agent	0.078125	0.005141939	1.94E-05	0.000164137	7.64E-05	1019/1956/2155/3162/2908	5
	GO:0051896	regulation of protein kinase B signaling	0.109375	0.013069095	1.97E-05	0.000165941	7.73E-05	1956/2099/2155/3630/3643/5747/7124	7
	GO:0044282	small molecule catabolic process	0.140625	0.023835029	1.97E-05	0.000165941	7.73E-05	217/1591/2645/4552/4846/5444/5465/5467/6652	9
	GO:0006953	acute-phase response	0.0625	0.002517408	2.00E-05	0.000168077	7.83E-05	3553/3569/3630/7124	4
	GO:0015908	fatty acid transport	0.078125	0.005195501	2.04E-05	0.000170619	7.95E-05	2167/3553/5465/5467/5468	5
	GO:0048872	homeostasis of number of cells	0.109375	0.013176219	2.07E-05	0.000172952	8.05E-05	2539/3162/3569/3718/4846/6647/7422	7
	GO:0002739	regulation of cytokine secretion involved in immune response	0.046875	0.00085699	2.08E-05	0.000173208	8.07E-05	335/5595/7124	3
	GO:0051186	cofactor metabolic process	0.140625	0.024049277	2.12E-05	0.000175535	8.17E-05	231/847/1956/2539/3156/3162/4552/4846/6647	9
	GO:0010721	negative regulation of cell development	0.125	0.018425281	2.21E-05	0.000182396	8.49E-05	2539/3553/3569/3949/5465/5747/7124/7422	8
	GO:0045926	negative regulation of growth	0.109375	0.013336904	2.24E-05	0.000184839	8.61E-05	154/2100/2539/5465/5467/5468/5747	7
	GO:0062014	negative regulation of small molecule metabolic process	0.078125	0.005302625	2.25E-05	0.00018517	8.62E-05	2645/3630/9971/5465/6647	5
	GO:0022600	digestive system process	0.078125	0.005356186	2.37E-05	0.000193069	8.99E-05	335/2169/3949/10062/7099	5
	GO:0003044	regulation of systemic arterial blood pressure mediated by a chemical signal	0.0625	0.002624531	2.37E-05	0.000193069	8.99E-05	154/185/1066/4846	4
	GO:0035094	response to nicotine	0.0625	0.002624531	2.37E-05	0.000193069	8.99E-05	3162/5465/7124/7412	4
	GO:1903426	regulation of reactive oxygen species biosynthetic process	0.078125	0.005409748	2.48E-05	0.000201712	9.39E-05	3553/3630/3643/7099/7124	5
	GO:0031649	heat generation	0.046875	0.000910552	2.52E-05	0.000202855	9.45E-05	154/3553/7124	3
	GO:0032966	negative regulation of collagen biosynthetic process	0.046875	0.000910552	2.52E-05	0.000202855	9.45E-05	3569/5467/5468	3
	GO:0045725	positive regulation of glycogen biosynthetic process	0.046875	0.000910552	2.52E-05	0.000202855	9.45E-05	2645/3630/3643	3
	GO:0098856	intestinal lipid absorption	0.046875	0.000910552	2.52E-05	0.000202855	9.45E-05	335/2169/3949	3
	GO:0045540	regulation of cholesterol biosynthetic process	0.0625	0.002678093	2.57E-05	0.000205294	9.56E-05	338/3156/6647/6721	4
	GO:0106118	regulation of sterol biosynthetic process	0.0625	0.002678093	2.57E-05	0.000205294	9.56E-05	338/3156/6647/6721	4
	GO:0010631	epithelial cell migration	0.125	0.018853776	2.60E-05	0.000207319	9.65E-05	335/3162/4318/4846/5467/5468/5747/7422	8
	GO:0002697	regulation of immune effector process	0.140625	0.024745581	2.65E-05	0.00021068	9.81E-05	335/3162/3553/3569/3630/3718/5595/7099/7124	9
	GO:0030324	lung development	0.09375	0.009212641	2.70E-05	0.000213917	9.96E-05	1956/3290/5595/4846/7124/7422	6
	GO:0090132	epithelium migration	0.125	0.019014462	2.76E-05	0.00021846	0.000101738	335/3162/4318/4846/5467/5468/5747/7422	8
	GO:0001523	retinoid metabolic process	0.078125	0.005570434	2.86E-05	0.000225425	0.000104981	231/335/338/1576/5467	5
	GO:0001666	response to hypoxia	0.125	0.019228709	2.99E-05	0.000235329	0.000109594	847/2155/3162/5327/5465/5467/7412/7422	8
	GO:0010713	negative regulation of collagen metabolic process	0.046875	0.000964114	3.02E-05	0.000235669	0.000109752	3569/5467/5468	3
	GO:0070875	positive regulation of glycogen metabolic process	0.046875	0.000964114	3.02E-05	0.000235669	0.000109752	2645/3630/3643	3
	GO:0150078	positive regulation of neuroinflammatory response	0.046875	0.000964114	3.02E-05	0.000235669	0.000109752	3553/3569/7124	3
	GO:0030323	respiratory tube development	0.09375	0.009426888	3.07E-05	0.000238892	0.000111253	1956/3290/5595/4846/7124/7422	6
	GO:0090130	tissue migration	0.125	0.019335833	3.11E-05	0.000241551	0.000112492	335/3162/4318/4846/5467/5468/5747/7422	8
	GO:0042136	neurotransmitter biosynthetic process	0.078125	0.005677558	3.13E-05	0.00024251	0.000112938	3553/3643/4846/7099/7124	5
	GO:0071346	cellular response to interferon-gamma	0.09375	0.009641136	3.48E-05	0.000266582	0.000124149	6347/7376/10062/5468/7099/7412	6
	GO:0071466	cellular response to xenobiotic stimulus	0.09375	0.009641136	3.48E-05	0.000266582	0.000124149	1066/1564/1576/1956/2690/2908	6
	GO:0002720	positive regulation of cytokine production involved in immune response	0.0625	0.002892341	3.49E-05	0.000266582	0.000124149	3553/3569/5595/7099	4
	GO:0051353	positive regulation of oxidoreductase activity	0.0625	0.002892341	3.49E-05	0.000266582	0.000124149	185/3553/3630/7124	4
	GO:1904645	response to amyloid-beta	0.0625	0.002892341	3.49E-05	0.000266582	0.000124149	154/4318/7099/7412	4
	GO:0002544	chronic inflammatory response	0.046875	0.001017675	3.58E-05	0.000270471	0.00012596	1588/7124/7412	3
	GO:0033189	response to vitamin A	0.046875	0.001017675	3.58E-05	0.000270471	0.00012596	847/5467/5468	3
	GO:0060252	positive regulation of glial cell proliferation	0.046875	0.001017675	3.58E-05	0.000270471	0.00012596	3553/3569/7124	3
	GO:1900409	positive regulation of cellular response to oxidative stress	0.046875	0.001017675	3.58E-05	0.000270471	0.00012596	6647/7099/7124	3
	GO:0036293	response to decreased oxygen levels	0.125	0.01981789	3.71E-05	0.000279485	0.000130158	847/2155/3162/5327/5465/5467/7412/7422	8
	GO:0001541	ovarian follicle development	0.0625	0.002945903	3.76E-05	0.000281353	0.000131028	268/2099/6647/7422	4
	GO:0043030	regulation of macrophage activation	0.0625	0.002945903	3.76E-05	0.000281353	0.000131028	3569/3949/10062/7099	4
	GO:0007548	sex differentiation	0.109375	0.014461703	3.76E-05	0.000281353	0.000131028	268/1588/2099/3643/4846/6647/7422	7
	GO:0016049	cell growth	0.140625	0.025923942	3.81E-05	0.000284336	0.000132417	185/1956/2100/2539/3630/5465/5467/5468/7422	9
	GO:0051098	regulation of binding	0.125	0.019978575	3.93E-05	0.000292146	0.000136054	154/2641/3162/5595/4318/5444/5465/5468	8
	GO:0060688	regulation of morphogenesis of a branching structure	0.0625	0.002999464	4.03E-05	0.000299377	0.000139421	2099/6256/7124/7422	4
	GO:0002374	cytokine secretion involved in immune response	0.046875	0.001071237	4.20E-05	0.000310961	0.000144816	335/5595/7124	3
	GO:1903428	positive regulation of reactive oxygen species biosynthetic process	0.0625	0.003053026	4.33E-05	0.000319516	0.0001488	3553/3643/7099/7124	4
	GO:0006690	icosanoid metabolic process	0.078125	0.006106052	4.45E-05	0.000326618	0.000152108	240/1564/3553/5595/5444	5
	GO:0042035	regulation of cytokine biosynthetic process	0.078125	0.006106052	4.45E-05	0.000326618	0.000152108	3162/3553/3569/7099/7124	5
	GO:0015711	organic anion transport	0.140625	0.026513123	4.54E-05	0.000332561	0.000154875	335/2167/3553/3949/9971/5465/5467/5468/6256	9
	GO:0042176	regulation of protein catabolic process	0.125	0.02040707	4.56E-05	0.000333426	0.000155278	1956/3156/3553/3630/3949/5747/7077/7124	8
	GO:1900542	regulation of purine nucleotide metabolic process	0.078125	0.006159614	4.64E-05	0.00033717	0.000157022	2645/3630/3643/4846/5465	5
	GO:0010676	positive regulation of cellular carbohydrate metabolic process	0.0625	0.003106588	4.64E-05	0.00033717	0.000157022	2645/3630/3643/5465	4
	GO:0045765	regulation of angiogenesis	0.125	0.020514194	4.73E-05	0.000343375	0.000159911	185/3162/3553/3569/4846/5468/5617/7422	8
	GO:0055093	response to hyperoxia	0.046875	0.001124799	4.89E-05	0.000352047	0.00016395	847/1019/5468	3
	GO:0090208	positive regulation of triglyceride metabolic process	0.046875	0.001124799	4.89E-05	0.000352047	0.00016395	3949/7376/10062	3
	GO:1902884	positive regulation of response to oxidative stress	0.046875	0.001124799	4.89E-05	0.000352047	0.00016395	6647/7099/7124	3
	GO:0010518	positive regulation of phospholipase activity	0.0625	0.00316015	4.96E-05	0.00035456	0.00016512	185/1956/2099/6401	4
	GO:0045824	negative regulation of innate immune response	0.0625	0.00316015	4.96E-05	0.00035456	0.00016512	3630/7376/10062/5468	4
	GO:0120178	steroid hormone biosynthetic process	0.0625	0.00316015	4.96E-05	0.00035456	0.00016512	231/1588/1576/3290	4
	GO:0043112	receptor metabolic process	0.09375	0.010283878	5.00E-05	0.000356285	0.000165924	10062/5465/5468/6401/7124/7422	6
	GO:0006140	regulation of nucleotide metabolic process	0.078125	0.006266738	5.03E-05	0.000358093	0.000166766	2645/3630/3643/4846/5465	5
	GO:0051403	stress-activated MAPK cascade	0.109375	0.015318693	5.42E-05	0.000384372	0.000179004	1956/3156/3553/5595/7099/7124/7422	7
	GO:0010866	regulation of triglyceride biosynthetic process	0.046875	0.001178361	5.65E-05	0.000393819	0.000183404	3949/7376/10062	3
	GO:0010869	regulation of receptor biosynthetic process	0.046875	0.001178361	5.65E-05	0.000393819	0.000183404	10062/5465/5468	3
	GO:0031281	positive regulation of cyclase activity	0.046875	0.001178361	5.65E-05	0.000393819	0.000183404	5595/4846/7077	3
	GO:0045723	positive regulation of fatty acid biosynthetic process	0.046875	0.001178361	5.65E-05	0.000393819	0.000183404	3553/7376/10062	3
	GO:0071404	cellular response to low-density lipoprotein particle stimulus	0.046875	0.001178361	5.65E-05	0.000393819	0.000183404	3949/5468/6721	3
	GO:1903589	positive regulation of blood vessel endothelial cell proliferation involved in sprouting angiogenesis	0.046875	0.001178361	5.65E-05	0.000393819	0.000183404	185/3162/7422	3
	GO:0034113	heterotypic cell-cell adhesion	0.0625	0.003267274	5.66E-05	0.000393819	0.000183404	335/3553/7124/7412	4
	GO:0090303	positive regulation of wound healing	0.0625	0.003267274	5.66E-05	0.000393819	0.000183404	2155/5467/6403/7099	4
	GO:0002698	negative regulation of immune effector process	0.078125	0.006427424	5.68E-05	0.000394467	0.000183705	335/3162/3630/3718/7124	5
	GO:0016052	carbohydrate catabolic process	0.09375	0.010605249	5.93E-05	0.000409707	0.000190803	2645/3630/3643/8972/5465/6652	6
	GO:0060541	respiratory system development	0.09375	0.010605249	5.93E-05	0.000409707	0.000190803	1956/3290/5595/4846/7124/7422	6
	GO:0034341	response to interferon-gamma	0.09375	0.010658811	6.10E-05	0.000420323	0.000195747	6347/7376/10062/5468/7099/7412	6
	GO:0016999	antibiotic metabolic process	0.078125	0.006534547	6.15E-05	0.000422769	0.000196886	231/217/847/1956/6647	5
	GO:0001503	ossification	0.125	0.021317622	6.20E-05	0.000425365	0.000198095	154/847/1591/1956/3569/5595/5747/7124	8
	GO:0042089	cytokine biosynthetic process	0.078125	0.006588109	6.39E-05	0.000437458	0.000203727	3162/3553/3569/7099/7124	5
	GO:0050995	negative regulation of lipid catabolic process	0.046875	0.001231923	6.48E-05	0.000441361	0.000205544	3553/3630/7124	3
	GO:0051043	regulation of membrane protein ectodomain proteolysis	0.046875	0.001231923	6.48E-05	0.000441361	0.000205544	3553/7077/7124	3
	GO:0014013	regulation of gliogenesis	0.078125	0.006641671	6.64E-05	0.000450404	0.000209755	3553/3569/3949/5468/7124	5
	GO:0042107	cytokine metabolic process	0.078125	0.006641671	6.64E-05	0.000450404	0.000209755	3162/3553/3569/7099/7124	5
	GO:0001818	negative regulation of cytokine production	0.109375	0.015854312	6.73E-05	0.000455004	0.000211898	335/3162/3569/3718/9971/7099/7124	7
	GO:0045785	positive regulation of cell adhesion	0.125	0.021585431	6.77E-05	0.000456652	0.000212665	335/6347/3553/3569/3718/7124/7412/7422	8
	GO:0045471	response to ethanol	0.078125	0.006695233	6.90E-05	0.00046469	0.000216409	847/2539/3156/6647/7412	5
	GO:0034764	positive regulation of transmembrane transport	0.09375	0.01092662	7.00E-05	0.000470014	0.000218888	154/673/6347/2539/3630/3643	6
	GO:0018105	peptidyl-serine phosphorylation	0.109375	0.016014997	7.17E-05	0.00048026	0.00022366	673/1956/2641/3569/5595/7124/7422	7
	GO:0002703	regulation of leukocyte mediated immunity	0.09375	0.010980182	7.19E-05	0.000480678	0.000223854	3162/3553/3569/3718/7099/7124	6
	GO:0009110	vitamin biosynthetic process	0.046875	0.001285485	7.39E-05	0.000492793	0.000229496	1576/3553/7124	3
	GO:0045727	positive regulation of translation	0.078125	0.006802357	7.44E-05	0.000495351	0.000230687	1019/3569/5595/6256/7124	5
	GO:0034284	response to monosaccharide	0.09375	0.011087306	7.58E-05	0.000503698	0.000234575	847/2641/2645/3156/9971/5467	6
	GO:0045428	regulation of nitric oxide biosynthetic process	0.0625	0.003535083	7.72E-05	0.000510115	0.000237563	3553/3643/7099/7124	4
	GO:0046626	regulation of insulin receptor signaling pathway	0.0625	0.003535083	7.72E-05	0.000510115	0.000237563	1019/3553/3630/9971	4
	GO:0007623	circadian rhythm	0.09375	0.011140868	7.79E-05	0.000513762	0.000239262	1019/1956/2155/10062/5465/5468	6
	GO:1903037	regulation of leukocyte cell-cell adhesion	0.109375	0.016282807	7.95E-05	0.000523187	0.000243651	6347/3553/3569/3718/5465/7124/7412	7
	GO:0097529	myeloid leukocyte migration	0.09375	0.011247991	8.21E-05	0.00053917	0.000251094	6347/1588/3553/3569/5595/7422	6
	GO:0050671	positive regulation of lymphocyte proliferation	0.078125	0.006963042	8.31E-05	0.000544622	0.000253633	3553/3569/3718/7099/7412	5
	GO:0019430	removal of superoxide radicals	0.046875	0.001339047	8.37E-05	0.000544876	0.000253752	4846/6647/7124	3
	GO:0060330	regulation of response to interferon-gamma	0.046875	0.001339047	8.37E-05	0.000544876	0.000253752	7376/10062/5468	3
	GO:0060334	regulation of interferon-gamma-mediated signaling pathway	0.046875	0.001339047	8.37E-05	0.000544876	0.000253752	7376/10062/5468	3
	GO:0032946	positive regulation of mononuclear cell proliferation	0.078125	0.007016604	8.62E-05	0.000559706	0.000260658	3553/3569/3718/7099/7412	5
	GO:0045598	regulation of fat cell differentiation	0.078125	0.007070166	8.94E-05	0.000578923	0.000269608	3569/3630/5467/5468/7124	5
	GO:0042698	ovulation cycle	0.0625	0.003695769	9.18E-05	0.000593699	0.000276489	268/1956/2099/4846	4
	GO:1901342	regulation of vasculature development	0.125	0.022603107	9.32E-05	0.000601432	0.00028009	185/3162/3553/3569/4846/5468/5617/7422	8
	GO:0030194	positive regulation of blood coagulation	0.046875	0.001392608	9.44E-05	0.000604968	0.000281737	2155/6403/7099	3
	GO:0034114	regulation of heterotypic cell-cell adhesion	0.046875	0.001392608	9.44E-05	0.000604968	0.000281737	335/3553/7124	3
	GO:1900048	positive regulation of hemostasis	0.046875	0.001392608	9.44E-05	0.000604968	0.000281737	2155/6403/7099	3
	GO:1901214	regulation of neuron death	0.109375	0.016764863	9.54E-05	0.000609784	0.00028398	6347/2539/3162/5465/6647/7099/7124	7
	GO:0032355	response to estradiol	0.078125	0.00717729	9.59E-05	0.000612037	0.000285029	338/847/1956/2099/2155	5
	GO:0010517	regulation of phospholipase activity	0.0625	0.00374933	9.72E-05	0.000617946	0.000287781	185/1956/2099/6401	4
	GO:0006898	receptor-mediated endocytosis	0.109375	0.016818425	9.73E-05	0.000617946	0.000287781	154/335/338/3643/3949/6401/7422	7
	GO:0050920	regulation of chemotaxis	0.09375	0.011622924	9.83E-05	0.000623291	0.00029027	6347/1588/2155/3569/5595/7422	6
	GO:0019722	calcium-mediated signaling	0.09375	0.011676486	0.000100861	0.000636455	0.000296401	185/1956/6401/6403/7124/7412	6
	GO:1903039	positive regulation of leukocyte cell-cell adhesion	0.09375	0.011676486	0.000100861	0.000636455	0.000296401	6347/3553/3569/3718/7124/7412	6
	GO:0002699	positive regulation of immune effector process	0.09375	0.011730048	0.000103427	0.000651233	0.000303283	3162/3553/3569/5595/7099/7124	6
	GO:0006706	steroid catabolic process	0.046875	0.00144617	0.000105958	0.000660026	0.000307378	1588/1591/1576	3
	GO:0050820	positive regulation of coagulation	0.046875	0.00144617	0.000105958	0.000660026	0.000307378	2155/6403/7099	3
	GO:0071450	cellular response to oxygen radical	0.046875	0.00144617	0.000105958	0.000660026	0.000307378	4846/6647/7124	3
	GO:0071451	cellular response to superoxide	0.046875	0.00144617	0.000105958	0.000660026	0.000307378	4846/6647/7124	3
	GO:1905208	negative regulation of cardiocyte differentiation	0.046875	0.00144617	0.000105958	0.000660026	0.000307378	1956/2539/5465	3
	GO:0032024	positive regulation of insulin secretion	0.0625	0.003856454	0.000108457	0.000674146	0.000313953	2641/2645/9971/5467	4
	GO:0007568	aging	0.109375	0.017193358	0.000111585	0.000692112	0.00032232	268/847/3156/5595/6647/7077/7412	7
	GO:0018209	peptidyl-serine modification	0.109375	0.01724692	0.00011376	0.000702814	0.000327304	673/1956/2641/3569/5595/7124/7422	7
	GO:0050715	positive regulation of cytokine secretion	0.078125	0.007445099	0.000114035	0.000702814	0.000327304	3553/3630/5595/7099/7124	5
	GO:0070665	positive regulation of leukocyte proliferation	0.078125	0.007445099	0.000114035	0.000702814	0.000327304	3553/3569/3718/7099/7412	5
	GO:0006801	superoxide metabolic process	0.0625	0.003910016	0.00011445	0.00070388	0.000327801	1956/4846/6647/7124	4
	GO:0008209	androgen metabolic process	0.046875	0.001499732	0.000118383	0.000721963	0.000336222	1588/1576/2099	3
	GO:0034368	protein-lipid complex remodeling	0.046875	0.001499732	0.000118383	0.000721963	0.000336222	185/335/338	3
	GO:0034369	plasma lipoprotein particle remodeling	0.046875	0.001499732	0.000118383	0.000721963	0.000336222	185/335/338	3
	GO:0036296	response to increased oxygen levels	0.046875	0.001499732	0.000118383	0.000721963	0.000336222	847/1019/5468	3
	GO:0014015	positive regulation of gliogenesis	0.0625	0.003963578	0.00012068	0.000731374	0.000340605	3553/3569/5468/7124	4
	GO:1900076	regulation of cellular response to insulin stimulus	0.0625	0.003963578	0.00012068	0.000731374	0.000340605	1019/3553/3630/9971	4
	GO:1903036	positive regulation of response to wounding	0.0625	0.003963578	0.00012068	0.000731374	0.000340605	2155/5467/6403/7099	4
	GO:0008286	insulin receptor signaling pathway	0.078125	0.007552223	0.000121964	0.000737617	0.000343512	1019/3553/3630/3643/9971	5
	GO:0046677	response to antibiotic	0.109375	0.01751473	0.000125158	0.000755362	0.000351776	847/2539/3156/3162/3569/6647/7412	7
	GO:0006073	cellular glucan metabolic process	0.0625	0.00401714	0.000127153	0.000764232	0.000355907	2645/3630/3643/8972	4
	GO:0044042	glucan metabolic process	0.0625	0.00401714	0.000127153	0.000764232	0.000355907	2645/3630/3643/8972	4
	GO:0000303	response to superoxide	0.046875	0.001553294	0.00013172	0.000785192	0.000365668	4846/6647/7124	3
	GO:0005979	regulation of glycogen biosynthetic process	0.046875	0.001553294	0.00013172	0.000785192	0.000365668	2645/3630/3643	3
	GO:0010962	regulation of glucan biosynthetic process	0.046875	0.001553294	0.00013172	0.000785192	0.000365668	2645/3630/3643	3
	GO:0034367	protein-containing complex remodeling	0.046875	0.001553294	0.00013172	0.000785192	0.000365668	185/335/338	3
	GO:0001937	negative regulation of endothelial cell proliferation	0.0625	0.004070702	0.000133874	0.000796397	0.000370886	6347/5468/5617/7124	4
	GO:0046942	carboxylic acid transport	0.109375	0.017728977	0.000134931	0.00080105	0.000373053	2167/3553/9971/5465/5467/5468/6256	7
	GO:2001234	negative regulation of apoptotic signaling pathway	0.09375	0.012319229	0.000135231	0.000801198	0.000373122	3162/3553/3630/4318/4846/7124	6
	GO:0015849	organic acid transport	0.109375	0.017836101	0.000140045	0.000828033	0.000385619	2167/3553/9971/5465/5467/5468/6256	7
	GO:0006110	regulation of glycolytic process	0.0625	0.004124264	0.000140848	0.000829405	0.000386258	2645/3630/3643/5465	4
	GO:1901224	positive regulation of NIK/NF-kappaB signaling	0.0625	0.004124264	0.000140848	0.000829405	0.000386258	1956/3553/7099/7124	4
	GO:0002224	toll-like receptor signaling pathway	0.078125	0.007820032	0.000143641	0.00084244	0.000392329	338/2099/10062/9971/7099	5
	GO:0035264	multicellular organism growth	0.078125	0.007820032	0.000143641	0.00084244	0.000392329	154/1019/2690/5617/6647	5
	GO:0000305	response to oxygen radical	0.046875	0.001606856	0.000145998	0.000854544	0.000397966	4846/6647/7124	3
	GO:0007596	blood coagulation	0.109375	0.017996786	0.000148011	0.000864588	0.000402643	2155/3569/5595/4846/5327/6403/7099	7
	GO:0046777	protein autophosphorylation	0.09375	0.012587038	0.000152039	0.000886336	0.000412772	1956/3630/3643/5595/5747/7422	6
	GO:0045913	positive regulation of carbohydrate metabolic process	0.0625	0.004231387	0.00015558	0.000903356	0.000420697	2645/3630/3643/5465	4
	GO:0071260	cellular response to mechanical stimulus	0.0625	0.004231387	0.00015558	0.000903356	0.000420697	1956/3553/5595/7099	4
	GO:0043122	regulation of I-kappaB kinase/NF-kappaB signaling	0.09375	0.012694162	0.000159209	0.000920751	0.000428798	2099/3162/3553/9971/7099/7124	6
	GO:0072330	monocarboxylic acid biosynthetic process	0.09375	0.012694162	0.000159209	0.000920751	0.000428798	240/1576/3553/7376/10062/9971	6
	GO:0002675	positive regulation of acute inflammatory response	0.046875	0.001660418	0.000161246	0.000925176	0.000430859	3553/3569/7124	3
	GO:0010543	regulation of platelet activation	0.046875	0.001660418	0.000161246	0.000925176	0.000430859	4846/6403/7099	3
	GO:0032770	positive regulation of monooxygenase activity	0.046875	0.001660418	0.000161246	0.000925176	0.000430859	3553/3630/7124	3
	GO:1902895	positive regulation of pri-miRNA transcription by RNA polymerase II	0.046875	0.001660418	0.000161246	0.000925176	0.000430859	2908/5617/6721	3
	GO:0007599	hemostasis	0.109375	0.018264596	0.000162103	0.000928265	0.000432298	2155/3569/5595/4846/5327/6403/7099	7
	GO:0030258	lipid modification	0.09375	0.012747724	0.000162892	0.00093095	0.000433548	185/335/1576/5465/5467/5468	6
	GO:0050817	coagulation	0.109375	0.018318157	0.000165048	0.000941423	0.000438426	2155/3569/5595/4846/5327/6403/7099	7
	GO:0032675	regulation of interleukin-6 production	0.078125	0.008141403	0.000173416	0.000985288	0.000458854	3553/3569/9971/7099/7124	5
	GO:0034250	positive regulation of cellular amide metabolic process	0.078125	0.008141403	0.000173416	0.000985288	0.000458854	1019/3569/5595/6256/7124	5
	GO:0001667	ameboidal-type cell migration	0.125	0.024745581	0.000173849	0.000985824	0.000459104	335/3162/4318/4846/5467/5468/5747/7422	8
	GO:0042311	vasodilation	0.046875	0.00171398	0.000177492	0.001004521	0.000467811	154/4846/6647	3
	GO:0030168	platelet activation	0.078125	0.008194965	0.000178805	0.001007438	0.000469169	3569/5595/4846/6403/7099	5
	GO:0042133	neurotransmitter metabolic process	0.078125	0.008194965	0.000178805	0.001007438	0.000469169	3553/3643/4846/7099/7124	5
	GO:0001819	positive regulation of cytokine production	0.125	0.024852705	0.000179046	0.001007438	0.000469169	3162/3553/3569/3630/5595/6647/7099/7124	8
	GO:0009266	response to temperature stimulus	0.09375	0.013015533	0.000182337	0.001023973	0.00047687	154/3162/5595/4846/5468/6647	6
	GO:0070997	neuron death	0.109375	0.018639529	0.000183643	0.001029322	0.000479361	6347/2539/3162/5465/6647/7099/7124	7
	GO:0006970	response to osmotic stress	0.0625	0.004445635	0.00018834	0.001051597	0.000489734	231/1956/6652/7124	4
	GO:0048145	regulation of fibroblast proliferation	0.0625	0.004445635	0.00018834	0.001051597	0.000489734	1019/1956/2099/5468	4
	GO:0048144	fibroblast proliferation	0.0625	0.004499197	0.000197251	0.001095047	0.000509969	1019/1956/2099/5468	4
	GO:0050886	endocrine process	0.0625	0.004499197	0.000197251	0.001095047	0.000509969	185/1066/3553/4846	4
	GO:0097756	negative regulation of blood vessel diameter	0.0625	0.004499197	0.000197251	0.001095047	0.000509969	185/1956/3156/3630	4
	GO:0097237	cellular response to toxic substance	0.09375	0.01322978	0.000199178	0.001103635	0.000513969	847/3162/3569/4846/6647/7124	6
	GO:0003012	muscle system process	0.125	0.0252812	0.000201133	0.001112352	0.000518028	154/2539/3162/3553/4846/5465/5747/6647	8
	GO:1904705	regulation of vascular smooth muscle cell proliferation	0.0625	0.004552758	0.000206463	0.0011375	0.00052974	3162/4318/5468/7124	4
	GO:1990874	vascular smooth muscle cell proliferation	0.0625	0.004552758	0.000206463	0.0011375	0.00052974	3162/4318/5468/7124	4
	GO:0046394	carboxylic acid biosynthetic process	0.109375	0.019014462	0.000207447	0.00114076	0.000531258	240/1576/3553/4552/7376/10062/9971	7
	GO:0016053	organic acid biosynthetic process	0.109375	0.019068024	0.000211042	0.001158341	0.000539446	240/1576/3553/4552/7376/10062/9971	7
	GO:0007260	tyrosine phosphorylation of STAT protein	0.0625	0.00460632	0.00021598	0.00118099	0.000549993	2690/3569/3718/7124	4
	GO:0034637	cellular carbohydrate biosynthetic process	0.0625	0.00460632	0.00021598	0.00118099	0.000549993	231/2645/3630/3643	4
	GO:0002690	positive regulation of leukocyte chemotaxis	0.0625	0.004659882	0.00022581	0.001230115	0.000572871	2155/3569/5595/7422	4
	GO:0043470	regulation of carbohydrate catabolic process	0.0625	0.004659882	0.00022581	0.001230115	0.000572871	2645/3630/3643/5465	4
	GO:0032635	interleukin-6 production	0.078125	0.00862346	0.000226659	0.00123243	0.000573949	3553/3569/9971/7099/7124	5
	GO:0001893	maternal placenta development	0.046875	0.001874665	0.000232499	0.001254804	0.000584369	5595/5467/6256	3
	GO:0034142	toll-like receptor 4 signaling pathway	0.046875	0.001874665	0.000232499	0.001254804	0.000584369	10062/9971/7099	3
	GO:0060251	regulation of glial cell proliferation	0.046875	0.001874665	0.000232499	0.001254804	0.000584369	3553/3569/7124	3
	GO:0070873	regulation of glycogen metabolic process	0.046875	0.001874665	0.000232499	0.001254804	0.000584369	2645/3630/3643	3
	GO:1900407	regulation of cellular response to oxidative stress	0.0625	0.004713444	0.000235958	0.001268764	0.00059087	3630/6647/7099/7124	4
	GO:1904035	regulation of epithelial cell apoptotic process	0.0625	0.004713444	0.000235958	0.001268764	0.00059087	6347/3162/3569/7124	4
	GO:0022409	positive regulation of cell-cell adhesion	0.09375	0.013658275	0.00023654	0.001269546	0.000591234	6347/3553/3569/3718/7124/7412	6
	GO:0045931	positive regulation of mitotic cell cycle	0.078125	0.008730584	0.000240015	0.001285829	0.000598817	1019/1956/3553/3630/3643	5
	GO:0006633	fatty acid biosynthetic process	0.078125	0.008784146	0.000246914	0.001320357	0.000614897	240/1576/3553/7376/10062	5
	GO:0090322	regulation of superoxide metabolic process	0.046875	0.001928227	0.000253016	0.001350502	0.000628936	1956/6647/7124	3
	GO:0050680	negative regulation of epithelial cell proliferation	0.078125	0.008837708	0.000253963	0.001353076	0.000630135	6347/5467/5468/5617/7124	5
	GO:0090257	regulation of muscle system process	0.09375	0.013872523	0.000257184	0.001360525	0.000633604	154/2539/4846/5465/5747/6647	6
	GO:0031058	positive regulation of histone modification	0.0625	0.004820568	0.000257232	0.001360525	0.000633604	2641/3553/5595/7422	4
	GO:0043255	regulation of carbohydrate biosynthetic process	0.0625	0.004820568	0.000257232	0.001360525	0.000633604	2645/3630/3643/5465	4
	GO:0071674	mononuclear cell migration	0.0625	0.004820568	0.000257232	0.001360525	0.000633604	6347/3569/5595/7124	4
	GO:0060333	interferon-gamma-mediated signaling pathway	0.0625	0.00487413	0.000268371	0.00141508	0.00065901	7376/10062/5468/7412	4
	GO:1901568	fatty acid derivative metabolic process	0.078125	0.008944831	0.00026852	0.00141508	0.00065901	240/1564/3553/5595/5444	5
	GO:0032885	regulation of polysaccharide biosynthetic process	0.046875	0.001981789	0.000274669	0.00144226	0.000671668	2645/3630/3643	3
	GO:0043243	positive regulation of protein-containing complex disassembly	0.046875	0.001981789	0.000274669	0.00144226	0.000671668	154/3643/7124	3
	GO:0050806	positive regulation of synaptic transmission	0.078125	0.008998393	0.000276032	0.001446804	0.000673784	154/6347/1956/3630/7124	5
	GO:0003073	regulation of systemic arterial blood pressure	0.0625	0.004981253	0.000291683	0.001526087	0.000710707	154/185/1066/4846	4
	GO:0032620	interleukin-17 production	0.046875	0.002035351	0.000297484	0.001548089	0.000720953	3569/9971/7099	3
	GO:0048246	macrophage chemotaxis	0.046875	0.002035351	0.000297484	0.001548089	0.000720953	6347/1588/5595	3
	GO:0050892	intestinal absorption	0.046875	0.002035351	0.000297484	0.001548089	0.000720953	335/2169/3949	3
	GO:0032874	positive regulation of stress-activated MAPK cascade	0.078125	0.009212641	0.000307688	0.001598329	0.00074435	3156/3553/7099/7124/7422	5
	GO:0007249	I-kappaB kinase/NF-kappaB signaling	0.09375	0.014408141	0.00031504	0.001629109	0.000758685	2099/3162/3553/9971/7099/7124	6
	GO:0070304	positive regulation of stress-activated protein kinase signaling cascade	0.078125	0.009266202	0.000316015	0.001629109	0.000758685	3156/3553/7099/7124/7422	5
	GO:0002702	positive regulation of production of molecular mediator of immune response	0.0625	0.005088377	0.000316413	0.001629109	0.000758685	3553/3569/5595/7099	4
	GO:0002832	negative regulation of response to biotic stimulus	0.0625	0.005088377	0.000316413	0.001629109	0.000758685	3630/7376/10062/5468	4
	GO:0042102	positive regulation of T cell proliferation	0.0625	0.005088377	0.000316413	0.001629109	0.000758685	3553/3569/3718/7412	4
	GO:0045927	positive regulation of growth	0.09375	0.014461703	0.000321345	0.001646494	0.000766781	1956/2690/3630/3643/5467/7422	6
	GO:0055090	acylglycerol homeostasis	0.046875	0.002088913	0.000321488	0.001646494	0.000766781	335/10062/9971	3
	GO:0070328	triglyceride homeostasis	0.046875	0.002088913	0.000321488	0.001646494	0.000766781	335/10062/9971	3
	GO:0032755	positive regulation of interleukin-6 production	0.0625	0.005141939	0.000329327	0.001683675	0.000784096	3553/3569/7099/7124	4
	GO:1902882	regulation of response to oxidative stress	0.0625	0.005195501	0.000342613	0.00174853	0.0008143	3630/6647/7099/7124	4
	GO:0001990	regulation of systemic arterial blood pressure by hormone	0.046875	0.002142475	0.000346707	0.001760156	0.000819714	185/1066/4846	3
	GO:0046621	negative regulation of organ growth	0.046875	0.002142475	0.000346707	0.001760156	0.000819714	2539/5465/5747	3
	GO:0090207	regulation of triglyceride metabolic process	0.046875	0.002142475	0.000346707	0.001760156	0.000819714	3949/7376/10062	3
	GO:0043542	endothelial cell migration	0.09375	0.014675951	0.000347562	0.001761427	0.000820306	335/3162/4846/5468/5747/7422	6
	GO:0016054	organic acid catabolic process	0.09375	0.014729513	0.000354372	0.0017866	0.000832029	4552/4846/5444/5465/5467/6652	6
	GO:0043270	positive regulation of ion transport	0.09375	0.014729513	0.000354372	0.0017866	0.000832029	154/335/6347/2539/2641/3553	6
	GO:0046395	carboxylic acid catabolic process	0.09375	0.014729513	0.000354372	0.0017866	0.000832029	4552/4846/5444/5465/5467/6652	6
	GO:0006111	regulation of gluconeogenesis	0.046875	0.002196036	0.000373166	0.001865187	0.000868627	2645/3630/5465	3
	GO:0019432	triglyceride biosynthetic process	0.046875	0.002196036	0.000373166	0.001865187	0.000868627	3949/7376/10062	3
	GO:0050873	brown fat cell differentiation	0.046875	0.002196036	0.000373166	0.001865187	0.000868627	154/2167/3630	3
	GO:0061028	establishment of endothelial barrier	0.046875	0.002196036	0.000373166	0.001865187	0.000868627	3553/7124/7422	3
	GO:0140353	lipid export from cell	0.046875	0.002196036	0.000373166	0.001865187	0.000868627	185/1588/3553	3
	GO:0022408	negative regulation of cell-cell adhesion	0.078125	0.009641136	0.000379194	0.00188883	0.000879638	335/3718/5465/5747/7422	5
	GO:0043534	blood vessel endothelial cell migration	0.078125	0.009641136	0.000379194	0.00188883	0.000879638	335/3162/4846/5468/7422	5
	GO:0050867	positive regulation of cell activation	0.109375	0.021103374	0.000389971	0.00193919	0.000903091	6347/3553/3569/3718/6403/7099/7412	7
	GO:0032649	regulation of interferon-gamma production	0.0625	0.005409748	0.00039962	0.001983316	0.000923641	3553/9971/7099/7124	4
	GO:0006509	membrane protein ectodomain proteolysis	0.046875	0.002249598	0.00040089	0.001983316	0.000923641	3553/7077/7124	3
	GO:0010677	negative regulation of cellular carbohydrate metabolic process	0.046875	0.002249598	0.00040089	0.001983316	0.000923641	2645/3630/5465	3
	GO:0032409	regulation of transporter activity	0.09375	0.015158007	0.000412695	0.002038252	0.000949225	154/6347/3630/4318/5444/5468	6
	GO:0098869	cellular oxidant detoxification	0.0625	0.00546331	0.000414869	0.002045514	0.000952607	847/4846/6647/7124	4
	GO:0010863	positive regulation of phospholipase C activity	0.046875	0.00230316	0.000429906	0.002087346	0.000972088	1956/2099/6401	3
	GO:0031279	regulation of cyclase activity	0.046875	0.00230316	0.000429906	0.002087346	0.000972088	5595/4846/7077	3
	GO:0032881	regulation of polysaccharide metabolic process	0.046875	0.00230316	0.000429906	0.002087346	0.000972088	2645/3630/3643	3
	GO:0042088	T-helper 1 type immune response	0.046875	0.00230316	0.000429906	0.002087346	0.000972088	3553/3718/7099	3
	GO:0046460	neutral lipid biosynthetic process	0.046875	0.00230316	0.000429906	0.002087346	0.000972088	3949/7376/10062	3
	GO:0046463	acylglycerol biosynthetic process	0.046875	0.00230316	0.000429906	0.002087346	0.000972088	3949/7376/10062	3
	GO:0060612	adipose tissue development	0.046875	0.00230316	0.000429906	0.002087346	0.000972088	1019/9971/5467	3
	GO:1904646	cellular response to amyloid-beta	0.046875	0.00230316	0.000429906	0.002087346	0.000972088	154/7099/7412	3
	GO:0044264	cellular polysaccharide metabolic process	0.0625	0.005516872	0.000430529	0.002087346	0.000972088	2645/3630/3643/8972	4
	GO:1905269	positive regulation of chromatin organization	0.0625	0.005516872	0.000430529	0.002087346	0.000972088	2641/3553/5595/7422	4
	GO:0030308	negative regulation of cell growth	0.078125	0.009962507	0.00044058	0.002132523	0.000993128	2100/2539/5465/5467/5468	5
	GO:2001237	negative regulation of extrinsic apoptotic signaling pathway	0.0625	0.005570434	0.000446606	0.0021581	0.001005039	3162/3553/4846/7124	4
	GO:0010828	positive regulation of glucose transmembrane transport	0.046875	0.002356722	0.000460237	0.002212943	0.001030579	673/3630/3643	3
	GO:0032965	regulation of collagen biosynthetic process	0.046875	0.002356722	0.000460237	0.002212943	0.001030579	3569/5467/5468	3
	GO:0045601	regulation of endothelial cell differentiation	0.046875	0.002356722	0.000460237	0.002212943	0.001030579	3553/7124/7422	3
	GO:2001233	regulation of apoptotic signaling pathway	0.109375	0.021746117	0.000466649	0.002240067	0.001043211	3162/3553/3630/4318/4846/6647/7124	7
	GO:0010632	regulation of epithelial cell migration	0.09375	0.015586502	0.000478278	0.002292109	0.001067447	3162/4318/4846/5468/5747/7422	6
	GO:0044275	cellular carbohydrate catabolic process	0.046875	0.002410284	0.000491909	0.002345842	0.001092471	3630/8972/6652	3
	GO:0071827	plasma lipoprotein particle organization	0.046875	0.002410284	0.000491909	0.002345842	0.001092471	185/335/338	3
	GO:1900274	regulation of phospholipase C activity	0.046875	0.002410284	0.000491909	0.002345842	0.001092471	1956/2099/6401	3
	GO:0043502	regulation of muscle adaptation	0.0625	0.005731119	0.000497408	0.002368182	0.001102875	2539/4846/5465/5747	4
	GO:0001660	fever generation	0.03125	0.000535619	0.000511414	0.002407288	0.001121087	3553/7124	2
	GO:0034378	chylomicron assembly	0.03125	0.000535619	0.000511414	0.002407288	0.001121087	335/338	2
	GO:0035376	sterol import	0.03125	0.000535619	0.000511414	0.002407288	0.001121087	335/3949	2
	GO:0051006	positive regulation of lipoprotein lipase activity	0.03125	0.000535619	0.000511414	0.002407288	0.001121087	7376/10062	2
	GO:0070508	cholesterol import	0.03125	0.000535619	0.000511414	0.002407288	0.001121087	335/3949	2
	GO:1900222	negative regulation of amyloid-beta clearance	0.03125	0.000535619	0.000511414	0.002407288	0.001121087	3156/7124	2
	GO:1990535	neuron projection maintenance	0.03125	0.000535619	0.000511414	0.002407288	0.001121087	3630/3643	2
	GO:0050890	cognition	0.09375	0.015854312	0.000523224	0.002427767	0.001130624	1956/3156/3630/3643/3949/7124	6
	GO:0005978	glycogen biosynthetic process	0.046875	0.002463846	0.000524945	0.002427767	0.001130624	2645/3630/3643	3
	GO:0007157	heterophilic cell-cell adhesion via plasma membrane cell adhesion molecules	0.046875	0.002463846	0.000524945	0.002427767	0.001130624	6401/6403/7412	3
	GO:0009250	glucan biosynthetic process	0.046875	0.002463846	0.000524945	0.002427767	0.001130624	2645/3630/3643	3
	GO:0022602	ovulation cycle process	0.046875	0.002463846	0.000524945	0.002427767	0.001130624	268/2099/4846	3
	GO:0032369	negative regulation of lipid transport	0.046875	0.002463846	0.000524945	0.002427767	0.001130624	7376/10062/6721	3
	GO:0045776	negative regulation of blood pressure	0.046875	0.002463846	0.000524945	0.002427767	0.001130624	154/4846/5465	3
	GO:0045981	positive regulation of nucleotide metabolic process	0.046875	0.002463846	0.000524945	0.002427767	0.001130624	3630/3643/4846	3
	GO:0051339	regulation of lyase activity	0.046875	0.002463846	0.000524945	0.002427767	0.001130624	4552/4846/7077	3
	GO:1900544	positive regulation of purine nucleotide metabolic process	0.046875	0.002463846	0.000524945	0.002427767	0.001130624	3630/3643/4846	3
	GO:1903587	regulation of blood vessel endothelial cell proliferation involved in sprouting angiogenesis	0.046875	0.002463846	0.000524945	0.002427767	0.001130624	185/3162/7422	3
	GO:0001676	long-chain fatty acid metabolic process	0.0625	0.005838243	0.000533481	0.002463329	0.001147186	240/1564/1576/5595	4
	GO:0030099	myeloid cell differentiation	0.109375	0.022281735	0.000539372	0.002486583	0.001158015	2539/3718/4318/5468/7099/7124/7422	7
	GO:0033559	unsaturated fatty acid metabolic process	0.0625	0.005891805	0.000552199	0.002541689	0.001183678	240/1564/3553/5595	4
	GO:0120163	negative regulation of cold-induced thermogenesis	0.046875	0.002517408	0.00055937	0.002570628	0.001197155	7376/10062/7099	3
	GO:1904019	epithelial cell apoptotic process	0.0625	0.005945367	0.000571379	0.002617478	0.001218974	6347/3162/3569/7124	4
	GO:0002221	pattern recognition receptor signaling pathway	0.078125	0.010551687	0.000572264	0.002617478	0.001218974	338/2099/10062/9971/7099	5
	GO:0009749	response to glucose	0.078125	0.010551687	0.000572264	0.002617478	0.001218974	2641/2645/3156/9971/5467	5
	GO:0010906	regulation of glucose metabolic process	0.0625	0.005998929	0.000591029	0.002692779	0.001254042	2645/3630/3643/5465	4
	GO:1990748	cellular detoxification	0.0625	0.005998929	0.000591029	0.002692779	0.001254042	847/4846/6647/7124	4
	GO:0001774	microglial cell activation	0.046875	0.002570969	0.000595207	0.002692779	0.001254042	3569/3949/7124	3
	GO:0002269	leukocyte activation involved in inflammatory response	0.046875	0.002570969	0.000595207	0.002692779	0.001254042	3569/3949/7124	3
	GO:0030850	prostate gland development	0.046875	0.002570969	0.000595207	0.002692779	0.001254042	1588/2099/6256	3
	GO:0035272	exocrine system development	0.046875	0.002570969	0.000595207	0.002692779	0.001254042	1956/3643/7124	3
	GO:0045912	negative regulation of carbohydrate metabolic process	0.046875	0.002570969	0.000595207	0.002692779	0.001254042	2645/3630/5465	3
	GO:0050866	negative regulation of cell activation	0.078125	0.010658811	0.000599073	0.002706063	0.001260228	3162/3718/3949/4846/10062	5
	GO:0006096	glycolytic process	0.0625	0.006052491	0.000611154	0.00274359	0.001277705	2645/3630/3643/5465	4
	GO:0032609	interferon-gamma production	0.0625	0.006052491	0.000611154	0.00274359	0.001277705	3553/9971/7099/7124	4
	GO:0046620	regulation of organ growth	0.0625	0.006052491	0.000611154	0.00274359	0.001277705	2539/5465/5747/6647	4
	GO:0048640	negative regulation of developmental growth	0.0625	0.006052491	0.000611154	0.00274359	0.001277705	154/2539/5465/5747	4
	GO:0002730	regulation of dendritic cell cytokine production	0.03125	0.000589181	0.000623681	0.002761472	0.001286032	3718/7099	2
	GO:0005984	disaccharide metabolic process	0.03125	0.000589181	0.000623681	0.002761472	0.001286032	673/8972	2
	GO:0031652	positive regulation of heat generation	0.03125	0.000589181	0.000623681	0.002761472	0.001286032	3553/7124	2
	GO:0033860	regulation of NAD(P)H oxidase activity	0.03125	0.000589181	0.000623681	0.002761472	0.001286032	185/3630	2
	GO:0046886	positive regulation of hormone biosynthetic process	0.03125	0.000589181	0.000623681	0.002761472	0.001286032	3553/7124	2
	GO:0048548	regulation of pinocytosis	0.03125	0.000589181	0.000623681	0.002761472	0.001286032	7376/10062	2
	GO:0060525	prostate glandular acinus development	0.03125	0.000589181	0.000623681	0.002761472	0.001286032	2099/6256	2
	GO:0060736	prostate gland growth	0.03125	0.000589181	0.000623681	0.002761472	0.001286032	1588/2099	2
	GO:0061365	positive regulation of triglyceride lipase activity	0.03125	0.000589181	0.000623681	0.002761472	0.001286032	7376/10062	2
	GO:0005976	polysaccharide metabolic process	0.0625	0.006106052	0.000631761	0.002775087	0.001292373	2645/3630/3643/8972	4
	GO:0006757	ATP generation from ADP	0.0625	0.006106052	0.000631761	0.002775087	0.001292373	2645/3630/3643/5465	4
	GO:0002686	negative regulation of leukocyte migration	0.046875	0.002624531	0.00063248	0.002775087	0.001292373	6347/1588/3162	3
	GO:0010712	regulation of collagen metabolic process	0.046875	0.002624531	0.00063248	0.002775087	0.001292373	3569/5467/5468	3
	GO:0032757	positive regulation of interleukin-8 production	0.046875	0.002624531	0.00063248	0.002775087	0.001292373	3553/7099/7124	3
	GO:0071825	protein-lipid complex subunit organization	0.046875	0.002624531	0.00063248	0.002775087	0.001292373	185/335/338	3
	GO:0009746	response to hexose	0.078125	0.010819497	0.000641044	0.002804204	0.001305933	2641/2645/3156/9971/5467	5
	GO:0050870	positive regulation of T cell activation	0.078125	0.010819497	0.000641044	0.002804204	0.001305933	6347/3553/3569/3718/7412	5
	GO:0032612	interleukin-1 production	0.0625	0.006159614	0.000652856	0.002847315	0.00132601	335/3553/9971/7099	4
	GO:0032963	collagen metabolic process	0.0625	0.006159614	0.000652856	0.002847315	0.00132601	3569/4318/5467/5468	4
	GO:0030278	regulation of ossification	0.078125	0.010873058	0.000655512	0.002852917	0.001328619	154/3569/5595/5747/7124	5
	GO:0006644	phospholipid metabolic process	0.109375	0.023031601	0.000656102	0.002852917	0.001328619	335/1798/3949/9971/5444/5467/5747	7
	GO:0002573	myeloid leukocyte differentiation	0.078125	0.01092662	0.000670225	0.002905584	0.001353146	4318/5468/7099/7124/7422	5
	GO:0045766	positive regulation of angiogenesis	0.078125	0.01092662	0.000670225	0.002905584	0.001353146	185/3162/3553/4846/7422	5
	GO:0014009	glial cell proliferation	0.046875	0.002678093	0.000671211	0.002905584	0.001353146	3553/3569/7124	3
	GO:0030100	regulation of endocytosis	0.078125	0.010980182	0.000685183	0.002961661	0.001379261	7376/10062/5468/6401/7422	5
	GO:1901222	regulation of NIK/NF-kappaB signaling	0.0625	0.006266738	0.000696539	0.003006278	0.00140004	1956/3553/7099/7124	4
	GO:0048146	positive regulation of fibroblast proliferation	0.046875	0.002731655	0.000711424	0.003063295	0.001426593	1019/1956/2099	3
	GO:0050804	modulation of chemical synaptic transmission	0.109375	0.023352973	0.000711906	0.003063295	0.001426593	154/6347/1956/3553/3630/5327/7124	7
	GO:0050863	regulation of T cell activation	0.09375	0.016818425	0.000712909	0.003063295	0.001426593	6347/3553/3569/3718/6647/7412	6
	GO:0002064	epithelial cell development	0.078125	0.011087306	0.00071585	0.003066874	0.00142826	2099/3553/6647/7124/7422	5
	GO:0070555	response to interleukin-1	0.078125	0.011087306	0.00071585	0.003066874	0.00142826	6347/3553/3569/5595/6401	5
	GO:0099177	regulation of trans-synaptic signaling	0.109375	0.023406535	0.000721563	0.003086804	0.001437541	154/6347/1956/3553/3630/5327/7124	7
	GO:0050670	regulation of lymphocyte proliferation	0.078125	0.011140868	0.000731563	0.00312499	0.001455324	3553/3569/3718/7099/7412	5
	GO:0002371	dendritic cell cytokine production	0.03125	0.000642742	0.000746763	0.003156133	0.001469828	3718/7099	2
	GO:0002674	negative regulation of acute inflammatory response	0.03125	0.000642742	0.000746763	0.003156133	0.001469828	3630/5468	2
	GO:0010889	regulation of sequestering of triglyceride	0.03125	0.000642742	0.000746763	0.003156133	0.001469828	5465/5468	2
	GO:0032429	regulation of phospholipase A2 activity	0.03125	0.000642742	0.000746763	0.003156133	0.001469828	185/1956	2
	GO:0033197	response to vitamin E	0.03125	0.000642742	0.000746763	0.003156133	0.001469828	847/5468	2
	GO:0045416	positive regulation of interleukin-8 biosynthetic process	0.03125	0.000642742	0.000746763	0.003156133	0.001469828	7099/7124	2
	GO:0060442	branching involved in prostate gland morphogenesis	0.03125	0.000642742	0.000746763	0.003156133	0.001469828	2099/6256	2
	GO:0032944	regulation of mononuclear cell proliferation	0.078125	0.01119443	0.000747534	0.003156133	0.001469828	3553/3569/3718/7099/7412	5
	GO:0009612	response to mechanical stimulus	0.078125	0.011247991	0.000763764	0.003215323	0.001497393	1956/3553/5595/5468/7099	5
	GO:0043523	regulation of neuron apoptotic process	0.078125	0.011247991	0.000763764	0.003215323	0.001497393	6347/2539/3162/6647/7124	5
	GO:0022612	gland morphogenesis	0.0625	0.006427424	0.000765889	0.003219612	0.001499391	1956/2099/6256/7124	4
	GO:1903578	regulation of ATP metabolic process	0.0625	0.006480986	0.000790053	0.003316397	0.001544464	2645/3630/3643/5465	4
	GO:0002043	blood vessel endothelial cell proliferation involved in sprouting angiogenesis	0.046875	0.002838779	0.000796385	0.003319031	0.00154569	185/3162/7422	3
	GO:0032715	negative regulation of interleukin-6 production	0.046875	0.002838779	0.000796385	0.003319031	0.00154569	9971/7099/7124	3
	GO:0032964	collagen biosynthetic process	0.046875	0.002838779	0.000796385	0.003319031	0.00154569	3569/5467/5468	3
	GO:0045840	positive regulation of mitotic nuclear division	0.046875	0.002838779	0.000796385	0.003319031	0.00154569	3553/3630/3643	3
	GO:1905517	macrophage migration	0.046875	0.002838779	0.000796385	0.003319031	0.00154569	6347/1588/5595	3
	GO:0034101	erythrocyte homeostasis	0.0625	0.006534547	0.00081475	0.003385869	0.001576817	2539/3162/3718/7422	4
	GO:0046031	ADP metabolic process	0.0625	0.006534547	0.00081475	0.003385869	0.001576817	2645/3630/3643/5465	4
	GO:0010872	regulation of cholesterol esterification	0.03125	0.000696304	0.000880589	0.003613023	0.001682604	185/335	2
	GO:0030656	regulation of vitamin metabolic process	0.03125	0.000696304	0.000880589	0.003613023	0.001682604	3553/7124	2
	GO:0031650	regulation of heat generation	0.03125	0.000696304	0.000880589	0.003613023	0.001682604	3553/7124	2
	GO:0033127	regulation of histone phosphorylation	0.03125	0.000696304	0.000880589	0.003613023	0.001682604	3553/5595	2
	GO:0034374	low-density lipoprotein particle remodeling	0.03125	0.000696304	0.000880589	0.003613023	0.001682604	185/338	2
	GO:0050872	white fat cell differentiation	0.03125	0.000696304	0.000880589	0.003613023	0.001682604	2167/5468	2
	GO:0061052	negative regulation of cell growth involved in cardiac muscle cell development	0.03125	0.000696304	0.000880589	0.003613023	0.001682604	2539/5465	2
	GO:1902894	negative regulation of pri-miRNA transcription by RNA polymerase II	0.03125	0.000696304	0.000880589	0.003613023	0.001682604	5465/5467	2
	GO:2000194	regulation of female gonad development	0.03125	0.000696304	0.000880589	0.003613023	0.001682604	268/3643	2
	GO:0043393	regulation of protein binding	0.078125	0.011622924	0.000884868	0.003625465	0.001688398	154/2641/5595/4318/5465	5
	GO:0042304	regulation of fatty acid biosynthetic process	0.046875	0.002945903	0.00088754	0.003631299	0.001691115	3553/7376/10062	3
	GO:0006805	xenobiotic metabolic process	0.0625	0.006695233	0.000892113	0.003644884	0.001697442	1066/1564/1576/2690	4
	GO:0035270	endocrine system development	0.0625	0.006802357	0.00094648	0.003861584	0.00179836	335/3569/3643/5595	4
	GO:0002576	platelet degranulation	0.0625	0.006855919	0.00097452	0.003970418	0.001849045	335/6403/6647/7422	4
	GO:0070663	regulation of leukocyte proliferation	0.078125	0.011890734	0.000979755	0.00398546	0.00185605	3553/3569/3718/7099/7412	5
	GO:0051251	positive regulation of lymphocyte activation	0.09375	0.017889663	0.000982055	0.00398546	0.00185605	6347/3553/3569/3718/7099/7412	6
	GO:0042743	hydrogen peroxide metabolic process	0.046875	0.003053026	0.000985062	0.00398546	0.00185605	847/1956/6647	3
	GO:0048008	platelet-derived growth factor receptor signaling pathway	0.046875	0.003053026	0.000985062	0.00398546	0.00185605	2155/5327/7422	3
	GO:0061178	regulation of insulin secretion involved in cellular response to glucose stimulus	0.046875	0.003053026	0.000985062	0.00398546	0.00185605	2641/3156/9971	3
	GO:0034754	cellular hormone metabolic process	0.0625	0.00690948	0.00100314	0.004052964	0.001887487	231/1588/1576/2099	4
	GO:0042110	T cell activation	0.109375	0.024852705	0.001024229	0.004130155	0.001923435	6347/3553/3569/3630/3718/6647/7412	7
	GO:0034370	triglyceride-rich lipoprotein particle remodeling	0.03125	0.000749866	0.001025085	0.004130155	0.001923435	335/338	2
	GO:0042157	lipoprotein metabolic process	0.0625	0.006963042	0.001032347	0.004153661	0.001934382	335/338/3949/5465	4
	GO:0055081	anion homeostasis	0.046875	0.003106588	0.001036264	0.004163663	0.00193904	335/3630/9971	3
	GO:0001649	osteoblast differentiation	0.078125	0.012051419	0.001040208	0.004173743	0.001943735	847/1591/3569/5747/7124	5
	GO:0001885	endothelial cell development	0.046875	0.00316015	0.001089121	0.004353723	0.002027552	3553/7124/7422	3
	GO:0033619	membrane protein proteolysis	0.046875	0.00316015	0.001089121	0.004353723	0.002027552	3553/7077/7124	3
	GO:0006165	nucleoside diphosphate phosphorylation	0.0625	0.007070166	0.001092547	0.004353723	0.002027552	2645/3630/3643/5465	4
	GO:0042177	negative regulation of protein catabolic process	0.0625	0.007070166	0.001092547	0.004353723	0.002027552	1956/3156/3630/7077	4
	GO:0055007	cardiac muscle cell differentiation	0.0625	0.007070166	0.001092547	0.004353723	0.002027552	2539/5465/6256/7422	4
	GO:0010594	regulation of endothelial cell migration	0.078125	0.012265667	0.001125073	0.004477207	0.002085059	3162/4846/5468/5747/7422	5
	GO:0046324	regulation of glucose import	0.046875	0.003213712	0.001143653	0.004544925	0.002116596	3630/3643/7124	3
	GO:1904018	positive regulation of vasculature development	0.078125	0.012319229	0.00114707	0.004552287	0.002120024	185/3162/3553/4846/7422	5
	GO:0009135	purine nucleoside diphosphate metabolic process	0.0625	0.00717729	0.001155171	0.004565752	0.002126295	2645/3630/3643/5465	4
	GO:0009179	purine ribonucleoside diphosphate metabolic process	0.0625	0.00717729	0.001155171	0.004565752	0.002126295	2645/3630/3643/5465	4
	GO:0046939	nucleotide phosphorylation	0.0625	0.00717729	0.001155171	0.004565752	0.002126295	2645/3630/3643/5465	4
	GO:0006000	fructose metabolic process	0.03125	0.000803428	0.001180179	0.004608243	0.002146083	231/6652	2
	GO:0030299	intestinal cholesterol absorption	0.03125	0.000803428	0.001180179	0.004608243	0.002146083	335/3949	2
	GO:0032352	positive regulation of hormone metabolic process	0.03125	0.000803428	0.001180179	0.004608243	0.002146083	3553/7124	2
	GO:0042159	lipoprotein catabolic process	0.03125	0.000803428	0.001180179	0.004608243	0.002146083	338/3949	2
	GO:0045410	positive regulation of interleukin-6 biosynthetic process	0.03125	0.000803428	0.001180179	0.004608243	0.002146083	3553/7124	2
	GO:0046321	positive regulation of fatty acid oxidation	0.03125	0.000803428	0.001180179	0.004608243	0.002146083	5465/5468	2
	GO:0051044	positive regulation of membrane protein ectodomain proteolysis	0.03125	0.000803428	0.001180179	0.004608243	0.002146083	3553/7124	2
	GO:0051770	positive regulation of nitric-oxide synthase biosynthetic process	0.03125	0.000803428	0.001180179	0.004608243	0.002146083	6347/7099	2
	GO:0055089	fatty acid homeostasis	0.03125	0.000803428	0.001180179	0.004608243	0.002146083	3630/9971	2
	GO:0050921	positive regulation of chemotaxis	0.0625	0.007230852	0.00118741	0.004630261	0.002156337	2155/3569/5595/7422	4
	GO:0010803	regulation of tumor necrosis factor-mediated signaling pathway	0.046875	0.003267274	0.00119988	0.004672625	0.002176067	335/9971/7124	3
	GO:0009185	ribonucleoside diphosphate metabolic process	0.0625	0.007284413	0.001220274	0.004745691	0.002210093	2645/3630/3643/5465	4
	GO:0010675	regulation of cellular carbohydrate metabolic process	0.0625	0.007337975	0.001253771	0.004862958	0.002264706	2645/3630/3643/5465	4
	GO:0098754	detoxification	0.0625	0.007337975	0.001253771	0.004862958	0.002264706	847/4846/6647/7124	4
	GO:0045453	bone resorption	0.046875	0.003320836	0.001257823	0.00487218	0.002269	154/1956/3569	3
	GO:0051249	regulation of lymphocyte activation	0.109375	0.025977504	0.001322625	0.00511638	0.002382725	6347/3553/3569/3718/6647/7099/7412	7
	GO:0019372	lipoxygenase pathway	0.03125	0.00085699	0.001345799	0.005164814	0.002405281	240/5444	2
	GO:0034116	positive regulation of heterotypic cell-cell adhesion	0.03125	0.00085699	0.001345799	0.005164814	0.002405281	3553/7124	2
	GO:0043031	negative regulation of macrophage activation	0.03125	0.00085699	0.001345799	0.005164814	0.002405281	3949/10062	2
	GO:0045986	negative regulation of smooth muscle contraction	0.03125	0.00085699	0.001345799	0.005164814	0.002405281	154/6647	2
	GO:0060965	negative regulation of gene silencing by miRNA	0.03125	0.00085699	0.001345799	0.005164814	0.002405281	2099/5468	2
	GO:1900451	positive regulation of glutamate receptor signaling pathway	0.03125	0.00085699	0.001345799	0.005164814	0.002405281	154/6347	2
	GO:0042737	drug catabolic process	0.0625	0.007498661	0.001358121	0.005204346	0.002423692	217/847/1564/1576	4
	GO:0051402	neuron apoptotic process	0.078125	0.012801285	0.001359678	0.005204346	0.002423692	6347/2539/3162/6647/7124	5
	GO:0035773	insulin secretion involved in cellular response to glucose stimulus	0.046875	0.003427959	0.001378934	0.005257297	0.002448352	2641/3156/9971	3
	GO:0045600	positive regulation of fat cell differentiation	0.046875	0.003427959	0.001378934	0.005257297	0.002448352	3630/5467/5468	3
	GO:1903672	positive regulation of sprouting angiogenesis	0.046875	0.003427959	0.001378934	0.005257297	0.002448352	185/3162/7422	3
	GO:0032729	positive regulation of interferon-gamma production	0.046875	0.003481521	0.00144214	0.005491081	0.002557226	3553/7099/7124	3
	GO:0030879	mammary gland development	0.0625	0.007659347	0.0014684	0.005576469	0.002596991	1588/2099/5617/7422	4
	GO:0031056	regulation of histone modification	0.0625	0.007659347	0.0014684	0.005576469	0.002596991	2641/3553/5595/7422	4
	GO:0051785	positive regulation of nuclear division	0.046875	0.003535083	0.001507139	0.005683092	0.002646646	3553/3630/3643	3
	GO:1905207	regulation of cardiocyte differentiation	0.046875	0.003535083	0.001507139	0.005683092	0.002646646	1956/2539/5465	3
	GO:0010744	positive regulation of macrophage derived foam cell differentiation	0.03125	0.000910552	0.001521873	0.005683092	0.002646646	185/338	2
	GO:0030540	female genitalia development	0.03125	0.000910552	0.001521873	0.005683092	0.002646646	1588/2099	2
	GO:0034384	high-density lipoprotein particle clearance	0.03125	0.000910552	0.001521873	0.005683092	0.002646646	335/3949	2
	GO:0034433	steroid esterification	0.03125	0.000910552	0.001521873	0.005683092	0.002646646	185/335	2
	GO:0034434	sterol esterification	0.03125	0.000910552	0.001521873	0.005683092	0.002646646	185/335	2
	GO:0034435	cholesterol esterification	0.03125	0.000910552	0.001521873	0.005683092	0.002646646	185/335	2
	GO:0042953	lipoprotein transport	0.03125	0.000910552	0.001521873	0.005683092	0.002646646	338/5468	2
	GO:0044872	lipoprotein localization	0.03125	0.000910552	0.001521873	0.005683092	0.002646646	338/5468	2
	GO:0045721	negative regulation of gluconeogenesis	0.03125	0.000910552	0.001521873	0.005683092	0.002646646	2645/3630	2
	GO:0060263	regulation of respiratory burst	0.03125	0.000910552	0.001521873	0.005683092	0.002646646	3630/3643	2
	GO:1903209	positive regulation of oxidative stress-induced cell death	0.03125	0.000910552	0.001521873	0.005683092	0.002646646	6647/7099	2
	GO:0002822	regulation of adaptive immune response based on somatic recombination of immune receptors built from immunoglobulin superfamily domains	0.0625	0.00776647	0.001545299	0.005763174	0.002683941	3553/3569/3718/7124	4
	GO:0048662	negative regulation of smooth muscle cell proliferation	0.046875	0.003588645	0.00157395	0.00586251	0.002730202	3162/5467/5468	3
	GO:0042542	response to hydrogen peroxide	0.0625	0.007820032	0.001584783	0.005887781	0.002741971	847/3162/3569/6647	4
	GO:0051384	response to glucocorticoid	0.0625	0.007820032	0.001584783	0.005887781	0.002741971	1956/3569/2908/7124	4
	GO:0030198	extracellular matrix organization	0.09375	0.019710766	0.001612109	0.005981666	0.002785694	3569/4318/5747/7077/7124/7412	6
	GO:0043062	extracellular structure organization	0.09375	0.019764328	0.001634416	0.006056709	0.002820642	3569/4318/5747/7077/7124/7412	6
	GO:0016239	positive regulation of macroautophagy	0.046875	0.003642207	0.00164259	0.006071532	0.002827545	154/3162/5595	3
	GO:0046323	glucose import	0.046875	0.003642207	0.00164259	0.006071532	0.002827545	3630/3643/7124	3
	GO:0045017	glycerolipid biosynthetic process	0.078125	0.013444028	0.001686818	0.0062271	0.002899994	335/3949/7376/10062/9971	5
	GO:0051023	regulation of immunoglobulin secretion	0.03125	0.000964114	0.00170833	0.006258856	0.002914783	3569/7124	2
	GO:0060749	mammary gland alveolus development	0.03125	0.000964114	0.00170833	0.006258856	0.002914783	2099/7422	2
	GO:0061377	mammary gland lobule development	0.03125	0.000964114	0.00170833	0.006258856	0.002914783	2099/7422	2
	GO:0071605	monocyte chemotactic protein-1 production	0.03125	0.000964114	0.00170833	0.006258856	0.002914783	3553/9971	2
	GO:0071637	regulation of monocyte chemotactic protein-1 production	0.03125	0.000964114	0.00170833	0.006258856	0.002914783	3553/9971	2
	GO:1900221	regulation of amyloid-beta clearance	0.03125	0.000964114	0.00170833	0.006258856	0.002914783	3156/7124	2
	GO:0006090	pyruvate metabolic process	0.0625	0.00803428	0.001749758	0.006402575	0.002981713	2645/3630/3643/5465	4
	GO:0034121	regulation of toll-like receptor signaling pathway	0.046875	0.00374933	0.001785434	0.006516721	0.003034872	2099/10062/7099	3
	GO:0051966	regulation of synaptic transmission, glutamatergic	0.046875	0.00374933	0.001785434	0.006516721	0.003034872	6347/1956/7124	3
	GO:0001678	cellular glucose homeostasis	0.0625	0.008141403	0.001836562	0.006694937	0.003117868	2641/2645/3156/9971	4
	GO:0050730	regulation of peptidyl-tyrosine phosphorylation	0.078125	0.013711837	0.001838933	0.006695191	0.003117986	1956/2690/3569/7124/7422	5
	GO:0033692	cellular polysaccharide biosynthetic process	0.046875	0.003802892	0.001859672	0.006753791	0.003145277	2645/3630/3643	3
	GO:0042531	positive regulation of tyrosine phosphorylation of STAT protein	0.046875	0.003802892	0.001859672	0.006753791	0.003145277	2690/3569/7124	3
	GO:0002696	positive regulation of leukocyte activation	0.09375	0.020353508	0.001895643	0.00680827	0.003170648	6347/3553/3569/3718/7099/7412	6
	GO:0002689	negative regulation of leukocyte chemotaxis	0.03125	0.001017675	0.001905098	0.00680827	0.003170648	6347/1588	2
	GO:0002726	positive regulation of T cell cytokine production	0.03125	0.001017675	0.001905098	0.00680827	0.003170648	3553/3569	2
	GO:0002922	positive regulation of humoral immune response	0.03125	0.001017675	0.001905098	0.00680827	0.003170648	3553/7124	2
	GO:0030949	positive regulation of vascular endothelial growth factor receptor signaling pathway	0.03125	0.001017675	0.001905098	0.00680827	0.003170648	3553/7422	2
	GO:0032930	positive regulation of superoxide anion generation	0.03125	0.001017675	0.001905098	0.00680827	0.003170648	1956/6647	2
	GO:0044241	lipid digestion	0.03125	0.001017675	0.001905098	0.00680827	0.003170648	335/3949	2
	GO:0045414	regulation of interleukin-8 biosynthetic process	0.03125	0.001017675	0.001905098	0.00680827	0.003170648	7099/7124	2
	GO:0051546	keratinocyte migration	0.03125	0.001017675	0.001905098	0.00680827	0.003170648	4318/5467	2
	GO:0060149	negative regulation of posttranscriptional gene silencing	0.03125	0.001017675	0.001905098	0.00680827	0.003170648	2099/5468	2
	GO:0060967	negative regulation of gene silencing by RNA	0.03125	0.001017675	0.001905098	0.00680827	0.003170648	2099/5468	2
	GO:1903798	regulation of production of miRNAs involved in gene silencing by miRNA	0.03125	0.001017675	0.001905098	0.00680827	0.003170648	1956/2099	2
	GO:1905939	regulation of gonad development	0.03125	0.001017675	0.001905098	0.00680827	0.003170648	268/3643	2
	GO:0009132	nucleoside diphosphate metabolic process	0.0625	0.008248527	0.001926312	0.006875635	0.00320202	2645/3630/3643/5465	4
	GO:0003007	heart morphogenesis	0.078125	0.013872523	0.001934903	0.006892628	0.003209934	3643/4846/5747/6256/7422	5
	GO:0002532	production of molecular mediator involved in inflammatory response	0.046875	0.003856454	0.001935812	0.006892628	0.003209934	240/3630/7099	3
	GO:2001236	regulation of extrinsic apoptotic signaling pathway	0.0625	0.008302089	0.001972308	0.007013991	0.003266453	3162/3553/4846/7124	4
	GO:0045685	regulation of glial cell differentiation	0.046875	0.003910016	0.00201387	0.007145311	0.00332761	3569/3949/5468	3
	GO:0030856	regulation of epithelial cell differentiation	0.0625	0.008355651	0.00201906	0.007145311	0.00332761	3553/4318/7124/7422	4
	GO:0042129	regulation of T cell proliferation	0.0625	0.008355651	0.00201906	0.007145311	0.00332761	3553/3569/3718/7412	4
	GO:0043535	regulation of blood vessel endothelial cell migration	0.0625	0.008355651	0.00201906	0.007145311	0.00332761	3162/4846/5468/7422	4
	GO:0043467	regulation of generation of precursor metabolites and energy	0.0625	0.008409213	0.002066574	0.007304573	0.003401779	2645/3630/3643/5465	4
	GO:0005977	glycogen metabolic process	0.046875	0.003963578	0.002093864	0.007365238	0.003430031	2645/3630/3643	3
	GO:0032677	regulation of interleukin-8 production	0.046875	0.003963578	0.002093864	0.007365238	0.003430031	3553/7099/7124	3
	GO:0050710	negative regulation of cytokine secretion	0.046875	0.003963578	0.002093864	0.007365238	0.003430031	335/9971/7124	3
	GO:1901616	organic hydroxy compound catabolic process	0.046875	0.003963578	0.002093864	0.007365238	0.003430031	217/1591/6652	3
	GO:0042228	interleukin-8 biosynthetic process	0.03125	0.001071237	0.002112108	0.007384763	0.003439124	7099/7124	2
	GO:0051767	nitric-oxide synthase biosynthetic process	0.03125	0.001071237	0.002112108	0.007384763	0.003439124	6347/7099	2
	GO:0051769	regulation of nitric-oxide synthase biosynthetic process	0.03125	0.001071237	0.002112108	0.007384763	0.003439124	6347/7099	2
	GO:0097062	dendritic spine maintenance	0.03125	0.001071237	0.002112108	0.007384763	0.003439124	3630/3643	2
	GO:1903978	regulation of microglial cell activation	0.03125	0.001071237	0.002112108	0.007384763	0.003439124	3569/3949	2
	GO:0010611	regulation of cardiac muscle hypertrophy	0.046875	0.00401714	0.002175811	0.007589249	0.003534354	2539/5465/5747	3
	GO:1903201	regulation of oxidative stress-induced cell death	0.046875	0.00401714	0.002175811	0.007589249	0.003534354	3630/6647/7099	3
	GO:0002819	regulation of adaptive immune response	0.0625	0.008569898	0.002213753	0.007703119	0.003587384	3553/3569/3718/7124	4
	GO:2000241	regulation of reproductive process	0.0625	0.008569898	0.002213753	0.007703119	0.003587384	268/2099/3643/6256	4
	GO:0048844	artery morphogenesis	0.046875	0.004070702	0.002259726	0.007844323	0.003653143	338/3949/7422	3
	GO:0061045	negative regulation of wound healing	0.046875	0.004070702	0.002259726	0.007844323	0.003653143	3156/4846/5327	3
	GO:0010959	regulation of metal ion transport	0.09375	0.021103374	0.002272649	0.00787978	0.003669656	154/6347/2539/2641/2645/4846	6
	GO:0031960	response to corticosteroid	0.0625	0.008677022	0.0023158	0.00799045	0.003721195	1956/3569/2908/7124	4
	GO:0006907	pinocytosis	0.03125	0.001124799	0.002329289	0.00799045	0.003721195	7376/10062	2
	GO:0010829	negative regulation of glucose transmembrane transport	0.03125	0.001124799	0.002329289	0.00799045	0.003721195	3553/7124	2
	GO:0010893	positive regulation of steroid biosynthetic process	0.03125	0.001124799	0.002329289	0.00799045	0.003721195	3553/7124	2
	GO:0032682	negative regulation of chemokine production	0.03125	0.001124799	0.002329289	0.00799045	0.003721195	3569/9971	2
	GO:0035357	peroxisome proliferator activated receptor signaling pathway	0.03125	0.001124799	0.002329289	0.00799045	0.003721195	5468/6256	2
	GO:0035743	CD4-positive, alpha-beta T cell cytokine production	0.03125	0.001124799	0.002329289	0.00799045	0.003721195	3553/3569	2
	GO:0070920	regulation of production of small RNA involved in gene silencing by RNA	0.03125	0.001124799	0.002329289	0.00799045	0.003721195	1956/2099	2
	GO:0090280	positive regulation of calcium ion import	0.03125	0.001124799	0.002329289	0.00799045	0.003721195	6347/2641	2
	GO:0046651	lymphocyte proliferation	0.078125	0.014568827	0.002393685	0.008201685	0.003819568	3553/3569/3718/7099/7412	5
	GO:0000271	polysaccharide biosynthetic process	0.046875	0.004177825	0.002433528	0.008318606	0.003874019	2645/3630/3643	3
	GO:0014743	regulation of muscle hypertrophy	0.046875	0.004177825	0.002433528	0.008318606	0.003874019	2539/5465/5747	3
	GO:0002831	regulation of response to biotic stimulus	0.09375	0.021424746	0.002450533	0.008366903	0.003896512	3553/3630/5595/7376/10062/5468	6
	GO:0032943	mononuclear cell proliferation	0.078125	0.014675951	0.002470728	0.008425965	0.003924017	3553/3569/3718/7099/7412	5
	GO:0043536	positive regulation of blood vessel endothelial cell migration	0.046875	0.004231387	0.002523447	0.008595677	0.004003053	3162/4846/7422	3
	GO:0010884	positive regulation of lipid storage	0.03125	0.001178361	0.00255657	0.008627684	0.004017958	338/6721	2
	GO:0032928	regulation of superoxide anion generation	0.03125	0.001178361	0.00255657	0.008627684	0.004017958	1956/6647	2
	GO:0035584	calcium-mediated signaling using intracellular calcium source	0.03125	0.001178361	0.00255657	0.008627684	0.004017958	6403/7412	2
	GO:0046628	positive regulation of insulin receptor signaling pathway	0.03125	0.001178361	0.00255657	0.008627684	0.004017958	3630/9971	2
	GO:0048305	immunoglobulin secretion	0.03125	0.001178361	0.00255657	0.008627684	0.004017958	3569/7124	2
	GO:0051000	positive regulation of nitric-oxide synthase activity	0.03125	0.001178361	0.00255657	0.008627684	0.004017958	3630/7124	2
	GO:0060065	uterus development	0.03125	0.001178361	0.00255657	0.008627684	0.004017958	1588/2099	2
	GO:0071379	cellular response to prostaglandin stimulus	0.03125	0.001178361	0.00255657	0.008627684	0.004017958	338/5468	2
	GO:0070509	calcium ion import	0.046875	0.004284949	0.002615399	0.008815986	0.004105652	6347/2641/2645	3
	GO:0001822	kidney development	0.078125	0.014890198	0.002630213	0.008855659	0.004124128	185/231/847/4318/7422	5
	GO:0060485	mesenchyme development	0.078125	0.01494376	0.002671227	0.008983351	0.004183594	268/3553/3569/5595/4846	5
	GO:0051100	negative regulation of binding	0.0625	0.009051955	0.002698507	0.009064616	0.00422144	154/3162/5595/5465	4
	GO:0022617	extracellular matrix disassembly	0.046875	0.004338511	0.002709399	0.009090706	0.004233591	3569/4318/7077	3
	GO:0043433	negative regulation of DNA-binding transcription factor activity	0.0625	0.009105517	0.002756507	0.009238108	0.004302236	847/2099/3162/9971	4
	GO:0009251	glucan catabolic process	0.03125	0.001231923	0.002793883	0.009299092	0.004330637	3630/8972	2
	GO:0019400	alditol metabolic process	0.03125	0.001231923	0.002793883	0.009299092	0.004330637	231/6652	2
	GO:0045821	positive regulation of glycolytic process	0.03125	0.001231923	0.002793883	0.009299092	0.004330637	3630/3643	2
	GO:0051004	regulation of lipoprotein lipase activity	0.03125	0.001231923	0.002793883	0.009299092	0.004330637	7376/10062	2
	GO:0051349	positive regulation of lyase activity	0.03125	0.001231923	0.002793883	0.009299092	0.004330637	4846/7077	2
	GO:2000726	negative regulation of cardiac muscle cell differentiation	0.03125	0.001231923	0.002793883	0.009299092	0.004330637	2539/5465	2
	GO:0006094	gluconeogenesis	0.046875	0.004392073	0.002805463	0.009316315	0.004338657	2645/3630/5465	3
	GO:0032637	interleukin-8 production	0.046875	0.004392073	0.002805463	0.009316315	0.004338657	3553/7099/7124	3
	GO:0010634	positive regulation of epithelial cell migration	0.0625	0.009159079	0.002815356	0.009338508	0.004348993	3162/4318/4846/7422	4
	GO:0051262	protein tetramerization	0.0625	0.009212641	0.002875063	0.009525692	0.004436166	847/3156/3643/6256	4
	GO:0042509	regulation of tyrosine phosphorylation of STAT protein	0.046875	0.004445635	0.002903605	0.009598394	0.004470023	2690/3569/7124	3
	GO:0046470	phosphatidylcholine metabolic process	0.046875	0.004445635	0.002903605	0.009598394	0.004470023	335/3949/5444	3
	GO:2001252	positive regulation of chromosome organization	0.0625	0.009319764	0.00299707	0.009896114	0.004608673	2641/3553/5595/7422	4
	GO:0045445	myoblast differentiation	0.046875	0.004499197	0.00300384	0.009907224	0.004613847	3156/5467/7124	3
	GO:0002092	positive regulation of receptor internalization	0.03125	0.001285485	0.003041158	0.009940145	0.004629179	6401/7422	2
	GO:0007530	sex determination	0.03125	0.001285485	0.003041158	0.009940145	0.004629179	268/3643	2
	GO:0010288	response to lead ion	0.03125	0.001285485	0.003041158	0.009940145	0.004629179	847/1019	2
	GO:0010804	negative regulation of tumor necrosis factor-mediated signaling pathway	0.03125	0.001285485	0.003041158	0.009940145	0.004629179	335/9971	2
	GO:0042738	exogenous drug catabolic process	0.03125	0.001285485	0.003041158	0.009940145	0.004629179	1564/1576	2
	GO:0046697	decidualization	0.03125	0.001285485	0.003041158	0.009940145	0.004629179	5595/5467	2
	GO:0050996	positive regulation of lipid catabolic process	0.03125	0.001285485	0.003041158	0.009940145	0.004629179	3553/5465	2
	GO:1900078	positive regulation of cellular response to insulin stimulus	0.03125	0.001285485	0.003041158	0.009940145	0.004629179	3630/9971	2
	GO:0002695	negative regulation of leukocyte activation	0.0625	0.009373326	0.003059383	0.009988491	0.004651694	3162/3718/3949/10062	4
	GO:0034308	primary alcohol metabolic process	0.046875	0.004552758	0.003106183	0.010111003	0.004708748	231/217/1576	3
	GO:0007162	negative regulation of cell adhesion	0.078125	0.015479379	0.003107335	0.010111003	0.004708748	335/3718/5465/5747/7422	5
	GO:0097193	intrinsic apoptotic signaling pathway	0.078125	0.015479379	0.003107335	0.010111003	0.004708748	3162/3630/4318/6647/7124	5
	GO:0009408	response to heat	0.0625	0.009426888	0.003122578	0.010149249	0.00472656	3162/5595/4846/6647	4
	GO:0008625	extrinsic apoptotic signaling pathway via death domain receptors	0.046875	0.00460632	0.003210649	0.010423858	0.004854446	3162/4846/7124	3
	GO:0019693	ribose phosphate metabolic process	0.09375	0.02271023	0.003269025	0.010601554	0.0049372	2539/2645/3156/3630/3643/5465	6
	GO:0072001	renal system development	0.078125	0.015693626	0.003295426	0.010602023	0.004937419	185/231/847/4318/7422	5
	GO:0008211	glucocorticoid metabolic process	0.03125	0.001339047	0.003298326	0.010602023	0.004937419	335/3290	2
	GO:0030325	adrenal gland development	0.03125	0.001339047	0.003298326	0.010602023	0.004937419	335/3643	2
	GO:0044247	cellular polysaccharide catabolic process	0.03125	0.001339047	0.003298326	0.010602023	0.004937419	3630/8972	2
	GO:0045662	negative regulation of myoblast differentiation	0.03125	0.001339047	0.003298326	0.010602023	0.004937419	5467/7124	2
	GO:0050927	positive regulation of positive chemotaxis	0.03125	0.001339047	0.003298326	0.010602023	0.004937419	2155/7422	2
	GO:0051156	glucose 6-phosphate metabolic process	0.03125	0.001339047	0.003298326	0.010602023	0.004937419	2539/2645	2
	GO:0061050	regulation of cell growth involved in cardiac muscle cell development	0.03125	0.001339047	0.003298326	0.010602023	0.004937419	2539/5465	2
	GO:0006112	energy reserve metabolic process	0.046875	0.004659882	0.00331725	0.010605091	0.004938847	2645/3630/3643	3
	GO:0051781	positive regulation of cell division	0.046875	0.004659882	0.00331725	0.010605091	0.004938847	847/3553/7422	3
	GO:0048771	tissue remodeling	0.0625	0.009587574	0.003317509	0.010605091	0.004938847	154/1956/3569/4846	4
	GO:0051099	positive regulation of binding	0.0625	0.009587574	0.003317509	0.010605091	0.004938847	2641/4318/5444/5468	4
	GO:0071347	cellular response to interleukin-1	0.0625	0.009587574	0.003317509	0.010605091	0.004938847	6347/3553/3569/5595	4
	GO:1905330	regulation of morphogenesis of an epithelium	0.0625	0.009641136	0.003384288	0.010806691	0.005032734	2099/6256/7124/7422	4
	GO:0050768	negative regulation of neurogenesis	0.078125	0.01580075	0.003392494	0.010821015	0.005039404	3553/3569/3949/5747/7124	5
	GO:0050829	defense response to Gram-negative bacterium	0.046875	0.004713444	0.003426001	0.010903981	0.005078042	3569/6403/7099	3
	GO:1903725	regulation of phospholipid metabolic process	0.046875	0.004713444	0.003426001	0.010903981	0.005078042	3949/9971/5747	3
	GO:0043254	regulation of protein-containing complex assembly	0.09375	0.02297804	0.003462566	0.011008312	0.00512663	2099/3630/6403/7099/7124/7422	6
	GO:0061138	morphogenesis of a branching epithelium	0.0625	0.009748259	0.003520589	0.011176199	0.005204815	2099/6256/7124/7422	4
	GO:0055013	cardiac muscle cell development	0.046875	0.004767006	0.003536917	0.011176199	0.005204815	2539/5465/7422	3
	GO:0070661	leukocyte proliferation	0.078125	0.015961435	0.003541942	0.011176199	0.005204815	3553/3569/3718/7099/7412	5
	GO:0090068	positive regulation of cell cycle process	0.078125	0.015961435	0.003541942	0.011176199	0.005204815	1019/1956/3553/3630/3643	5
	GO:0003081	regulation of systemic arterial blood pressure by renin-angiotensin	0.03125	0.001392608	0.003565319	0.011176199	0.005204815	185/1066	2
	GO:0010758	regulation of macrophage chemotaxis	0.03125	0.001392608	0.003565319	0.011176199	0.005204815	1588/5595	2
	GO:0031954	positive regulation of protein autophosphorylation	0.03125	0.001392608	0.003565319	0.011176199	0.005204815	3630/7422	2
	GO:0032366	intracellular sterol transport	0.03125	0.001392608	0.003565319	0.011176199	0.005204815	1066/3949	2
	GO:0032367	intracellular cholesterol transport	0.03125	0.001392608	0.003565319	0.011176199	0.005204815	1066/3949	2
	GO:0050926	regulation of positive chemotaxis	0.03125	0.001392608	0.003565319	0.011176199	0.005204815	2155/7422	2
	GO:0060740	prostate gland epithelium morphogenesis	0.03125	0.001392608	0.003565319	0.011176199	0.005204815	2099/6256	2
	GO:0097066	response to thyroid hormone	0.03125	0.001392608	0.003565319	0.011176199	0.005204815	231/2155	2
	GO:1905048	regulation of metallopeptidase activity	0.03125	0.001392608	0.003565319	0.011176199	0.005204815	5595/7077	2
	GO:0006163	purine nucleotide metabolic process	0.09375	0.023138725	0.003582729	0.011217682	0.005224134	2645/3156/3630/3643/4846/5465	6
	GO:0038061	NIK/NF-kappaB signaling	0.0625	0.009801821	0.003590121	0.011217682	0.005224134	1956/3553/7099/7124	4
	GO:0043123	positive regulation of I-kappaB kinase/NF-kappaB signaling	0.0625	0.009801821	0.003590121	0.011217682	0.005224134	3162/3553/7099/7124	4
	GO:0046849	bone remodeling	0.046875	0.004820568	0.003650009	0.011380361	0.005299895	154/1956/3569	3
	GO:1903035	negative regulation of response to wounding	0.046875	0.004820568	0.003650009	0.011380361	0.005299895	3156/4846/5327	3
	GO:0042098	T cell proliferation	0.0625	0.009855383	0.003660583	0.011388915	0.005303878	3553/3569/3718/7412	4
	GO:0048639	positive regulation of developmental growth	0.0625	0.009855383	0.003660583	0.011388915	0.005303878	2690/3643/5467/7422	4
	GO:0046328	regulation of JNK cascade	0.0625	0.009908945	0.00373198	0.011586264	0.005395785	1956/3553/7099/7124	4
	GO:1902275	regulation of chromatin organization	0.0625	0.009908945	0.00373198	0.011586264	0.005395785	2641/3553/5595/7422	4
	GO:0000272	polysaccharide catabolic process	0.03125	0.00144617	0.003842068	0.011827063	0.005507926	3630/8972	2
	GO:0002825	regulation of T-helper 1 type immune response	0.03125	0.00144617	0.003842068	0.011827063	0.005507926	3553/3718	2
	GO:0009651	response to salt stress	0.03125	0.00144617	0.003842068	0.011827063	0.005507926	231/7124	2
	GO:0015721	bile acid and bile salt transport	0.03125	0.00144617	0.003842068	0.011827063	0.005507926	9971/6256	2
	GO:0045932	negative regulation of muscle contraction	0.03125	0.00144617	0.003842068	0.011827063	0.005507926	154/6647	2
	GO:0046885	regulation of hormone biosynthetic process	0.03125	0.00144617	0.003842068	0.011827063	0.005507926	3553/7124	2
	GO:1902175	regulation of oxidative stress-induced intrinsic apoptotic signaling pathway	0.03125	0.00144617	0.003842068	0.011827063	0.005507926	3630/6647	2
	GO:1905563	negative regulation of vascular endothelial cell proliferation	0.03125	0.00144617	0.003842068	0.011827063	0.005507926	6347/5468	2
	GO:0007589	body fluid secretion	0.046875	0.004981253	0.004002482	0.012268937	0.005713709	10062/5617/7422	3
	GO:0035249	synaptic transmission, glutamatergic	0.046875	0.004981253	0.004002482	0.012268937	0.005713709	6347/1956/7124	3
	GO:0036473	cell death in response to oxidative stress	0.046875	0.004981253	0.004002482	0.012268937	0.005713709	3630/6647/7099	3
	GO:0062207	regulation of pattern recognition receptor signaling pathway	0.046875	0.004981253	0.004002482	0.012268937	0.005713709	2099/10062/7099	3
	GO:0010894	negative regulation of steroid biosynthetic process	0.03125	0.001499732	0.004128505	0.012588911	0.005862723	9971/6647	2
	GO:0034377	plasma lipoprotein particle assembly	0.03125	0.001499732	0.004128505	0.012588911	0.005862723	335/338	2
	GO:0045408	regulation of interleukin-6 biosynthetic process	0.03125	0.001499732	0.004128505	0.012588911	0.005862723	3553/7124	2
	GO:0060512	prostate gland morphogenesis	0.03125	0.001499732	0.004128505	0.012588911	0.005862723	2099/6256	2
	GO:1902932	positive regulation of alcohol biosynthetic process	0.03125	0.001499732	0.004128505	0.012588911	0.005862723	3553/7124	2
	GO:0055006	cardiac cell development	0.046875	0.005088377	0.004248589	0.012927975	0.006020627	2539/5465/7422	3
	GO:1903076	regulation of protein localization to plasma membrane	0.046875	0.005088377	0.004248589	0.012927975	0.006020627	1956/3630/7124	3
	GO:0050731	positive regulation of peptidyl-tyrosine phosphorylation	0.0625	0.010283878	0.004258446	0.012944429	0.00602829	2690/3569/7124/7422	4
	GO:0010660	regulation of muscle cell apoptotic process	0.046875	0.005141939	0.004375016	0.013271035	0.006180392	3156/3162/5468	3
	GO:0048010	vascular endothelial growth factor receptor signaling pathway	0.046875	0.005141939	0.004375016	0.013271035	0.006180392	3553/5747/7422	3
	GO:0010575	positive regulation of vascular endothelial growth factor production	0.03125	0.001553294	0.004424563	0.013393396	0.006237376	3553/3569	2
	GO:0042226	interleukin-6 biosynthetic process	0.03125	0.001553294	0.004424563	0.013393396	0.006237376	3553/7124	2
	GO:0052547	regulation of peptidase activity	0.09375	0.024209963	0.004465059	0.013501931	0.006287922	5595/4318/5468/7077/7124/7422	6
	GO:0120162	positive regulation of cold-induced thermogenesis	0.046875	0.005195501	0.00450371	0.013604666	0.006335765	154/2167/7422	3
	GO:0051961	negative regulation of nervous system development	0.078125	0.016925549	0.004539967	0.013699961	0.006380145	3553/3569/3949/5747/7124	5
	GO:0001763	morphogenesis of a branching structure	0.0625	0.010498125	0.004580763	0.013808746	0.006430807	2099/6256/7124/7422	4
	GO:0045807	positive regulation of endocytosis	0.046875	0.005249063	0.004634682	0.013956821	0.006499766	5468/6401/7422	3
	GO:0035066	positive regulation of histone acetylation	0.03125	0.001606856	0.004730175	0.014112901	0.006572453	3553/5595	2
	GO:0042759	long-chain fatty acid biosynthetic process	0.03125	0.001606856	0.004730175	0.014112901	0.006572453	240/1576	2
	GO:0045939	negative regulation of steroid metabolic process	0.03125	0.001606856	0.004730175	0.014112901	0.006572453	9971/6647	2
	GO:0045948	positive regulation of translational initiation	0.03125	0.001606856	0.004730175	0.014112901	0.006572453	6256/7124	2
	GO:0046320	regulation of fatty acid oxidation	0.03125	0.001606856	0.004730175	0.014112901	0.006572453	5465/5468	2
	GO:0061082	myeloid leukocyte cytokine production	0.03125	0.001606856	0.004730175	0.014112901	0.006572453	3162/7099	2
	GO:0071549	cellular response to dexamethasone stimulus	0.03125	0.001606856	0.004730175	0.014112901	0.006572453	1956/2908	2
	GO:0097421	liver regeneration	0.03125	0.001606856	0.004730175	0.014112901	0.006572453	1956/3162	2
	GO:1901889	negative regulation of cell junction assembly	0.03125	0.001606856	0.004730175	0.014112901	0.006572453	5747/7124	2
	GO:0019395	fatty acid oxidation	0.046875	0.005302625	0.004767943	0.014211009	0.006618143	5465/5467/5468	3
	GO:0006109	regulation of carbohydrate metabolic process	0.0625	0.010658811	0.004833034	0.014390272	0.006701626	2645/3630/3643/5465	4
	GO:0002824	positive regulation of adaptive immune response based on somatic recombination of immune receptors built from immunoglobulin superfamily domains	0.046875	0.005356186	0.004903504	0.014540565	0.006771619	3553/3569/7124	3
	GO:0010657	muscle cell apoptotic process	0.046875	0.005356186	0.004903504	0.014540565	0.006771619	3156/3162/5468	3
	GO:0060840	artery development	0.046875	0.005356186	0.004903504	0.014540565	0.006771619	338/3949/7422	3
	GO:0070498	interleukin-1-mediated signaling pathway	0.046875	0.005356186	0.004903504	0.014540565	0.006771619	3553/3569/5595	3
	GO:0051346	negative regulation of hydrolase activity	0.09375	0.024799143	0.005014067	0.01480999	0.006897092	335/4318/4846/7077/7124/7422	6
	GO:0032611	interleukin-1 beta production	0.046875	0.005409748	0.005041378	0.01480999	0.006897092	335/3553/7099	3
	GO:0034440	lipid oxidation	0.046875	0.005409748	0.005041378	0.01480999	0.006897092	5465/5467/5468	3
	GO:1903829	positive regulation of cellular protein localization	0.078125	0.017354044	0.005042341	0.01480999	0.006897092	1956/3553/3630/6721/7124	5
	GO:0002724	regulation of T cell cytokine production	0.03125	0.001660418	0.005045273	0.01480999	0.006897092	3553/3569	2
	GO:0007202	activation of phospholipase C activity	0.03125	0.001660418	0.005045273	0.01480999	0.006897092	1956/6401	2
	GO:0019048	modulation by virus of host process	0.03125	0.001660418	0.005045273	0.01480999	0.006897092	3643/6256	2
	GO:0033198	response to ATP	0.03125	0.001660418	0.005045273	0.01480999	0.006897092	3553/6647	2
	GO:0034694	response to prostaglandin	0.03125	0.001660418	0.005045273	0.01480999	0.006897092	338/5468	2
	GO:0048710	regulation of astrocyte differentiation	0.03125	0.001660418	0.005045273	0.01480999	0.006897092	3569/3949	2
	GO:0008544	epidermis development	0.09375	0.024852705	0.005066335	0.014841862	0.006911935	1956/3643/5465/5467/6647/7124	6
	GO:0072521	purine-containing compound metabolic process	0.09375	0.024852705	0.005066335	0.014841862	0.006911935	2645/3156/3630/3643/4846/5465	6
	GO:0051701	interaction with host	0.0625	0.010819497	0.005094502	0.014909363	0.00694337	1956/3643/3949/6256	4
	GO:0010506	regulation of autophagy	0.078125	0.017568291	0.005307822	0.015496751	0.00721692	154/3162/5595/5747/6721	5
	GO:0032091	negative regulation of protein binding	0.046875	0.005516872	0.005324107	0.015496751	0.00721692	154/5595/5465	3
	GO:0032652	regulation of interleukin-1 production	0.046875	0.005516872	0.005324107	0.015496751	0.00721692	335/9971/7099	3
	GO:0006739	NADP metabolic process	0.03125	0.00171398	0.005369792	0.015496751	0.00721692	2539/2645	2
	GO:0008210	estrogen metabolic process	0.03125	0.00171398	0.005369792	0.015496751	0.00721692	1588/1576	2
	GO:0051968	positive regulation of synaptic transmission, glutamatergic	0.03125	0.00171398	0.005369792	0.015496751	0.00721692	6347/1956	2
	GO:0055022	negative regulation of cardiac muscle tissue growth	0.03125	0.00171398	0.005369792	0.015496751	0.00721692	2539/5465	2
	GO:0061117	negative regulation of heart growth	0.03125	0.00171398	0.005369792	0.015496751	0.00721692	2539/5465	2
	GO:0065005	protein-lipid complex assembly	0.03125	0.00171398	0.005369792	0.015496751	0.00721692	335/338	2
	GO:0071295	cellular response to vitamin	0.03125	0.00171398	0.005369792	0.015496751	0.00721692	1591/5468	2
	GO:0071353	cellular response to interleukin-4	0.03125	0.00171398	0.005369792	0.015496751	0.00721692	1019/3718	2
	GO:1900745	positive regulation of p38MAPK cascade	0.03125	0.00171398	0.005369792	0.015496751	0.00721692	3553/7422	2
	GO:1901661	quinone metabolic process	0.03125	0.00171398	0.005369792	0.015496751	0.00721692	231/3156	2
	GO:2000778	positive regulation of interleukin-6 secretion	0.03125	0.00171398	0.005369792	0.015496751	0.00721692	3553/7124	2
	GO:0042742	defense response to bacterium	0.078125	0.017675415	0.00544422	0.015695973	0.007309699	3569/9971/6403/7099/7124	5
	GO:0050679	positive regulation of epithelial cell proliferation	0.0625	0.011033744	0.005457693	0.015719235	0.007320532	185/1956/3162/7422	4
	GO:0071214	cellular response to abiotic stimulus	0.078125	0.017728977	0.005513344	0.01584814	0.007380564	231/1956/3553/5595/7099	5
	GO:0104004	cellular response to environmental stimulus	0.078125	0.017728977	0.005513344	0.01584814	0.007380564	231/1956/3553/5595/7099	5
	GO:0050769	positive regulation of neurogenesis	0.09375	0.025388324	0.00561138	0.016080285	0.007488675	3553/3569/5468/7077/7124/7422	6
	GO:0002708	positive regulation of lymphocyte mediated immunity	0.046875	0.005623996	0.005616215	0.016080285	0.007488675	3553/3569/7124	3
	GO:0002821	positive regulation of adaptive immune response	0.046875	0.005623996	0.005616215	0.016080285	0.007488675	3553/3569/7124	3
	GO:0055017	cardiac muscle tissue growth	0.046875	0.005623996	0.005616215	0.016080285	0.007488675	2539/5465/6256	3
	GO:1901215	negative regulation of neuron death	0.0625	0.011140868	0.005645629	0.016148609	0.007520493	6347/3162/5465/6647	4
	GO:0010039	response to iron ion	0.03125	0.001767542	0.005703665	0.016250697	0.007568036	2539/3162	2
	GO:0010737	protein kinase A signaling	0.03125	0.001767542	0.005703665	0.016250697	0.007568036	154/2641	2
	GO:0035774	positive regulation of insulin secretion involved in cellular response to glucose stimulus	0.03125	0.001767542	0.005703665	0.016250697	0.007568036	2641/9971	2
	GO:2000758	positive regulation of peptidyl-lysine acetylation	0.03125	0.001767542	0.005703665	0.016250697	0.007568036	3553/5595	2
	GO:0030336	negative regulation of cell migration	0.078125	0.017889663	0.00572445	0.016280624	0.007581974	6347/1588/3162/5467/5468	5
	GO:0034248	regulation of cellular amide metabolic process	0.09375	0.025495447	0.005725362	0.016280624	0.007581974	1019/3569/5595/9971/6256/7124	6
	GO:0003300	cardiac muscle hypertrophy	0.046875	0.005677558	0.005765812	0.016379637	0.007628084	2539/5465/5747	3
	GO:0045930	negative regulation of mitotic cell cycle	0.078125	0.01810391	0.006014748	0.017028283	0.007930162	6347/1019/1956/7077/7124	5
	GO:0007435	salivary gland morphogenesis	0.03125	0.001821103	0.006046826	0.017028283	0.007930162	1956/7124	2
	GO:0010574	regulation of vascular endothelial growth factor production	0.03125	0.001821103	0.006046826	0.017028283	0.007930162	3553/3569	2
	GO:0032148	activation of protein kinase B activity	0.03125	0.001821103	0.006046826	0.017028283	0.007930162	3630/3643	2
	GO:0032660	regulation of interleukin-17 production	0.03125	0.001821103	0.006046826	0.017028283	0.007930162	3569/7099	2
	GO:0060969	negative regulation of gene silencing	0.03125	0.001821103	0.006046826	0.017028283	0.007930162	2099/5468	2
	GO:0062208	positive regulation of pattern recognition receptor signaling pathway	0.03125	0.001821103	0.006046826	0.017028283	0.007930162	10062/7099	2
	GO:0070670	response to interleukin-4	0.03125	0.001821103	0.006046826	0.017028283	0.007930162	1019/3718	2
	GO:2000273	positive regulation of signaling receptor activity	0.03125	0.001821103	0.006046826	0.017028283	0.007930162	154/6347	2
	GO:0014897	striated muscle hypertrophy	0.046875	0.005838243	0.006228899	0.017508253	0.008153687	2539/5465/5747	3
	GO:0007254	JNK cascade	0.0625	0.011462239	0.006235321	0.017508253	0.008153687	1956/3553/7099/7124	4
	GO:0045732	positive regulation of protein catabolic process	0.0625	0.011462239	0.006235321	0.017508253	0.008153687	3553/3949/5747/7124	4
	GO:0043281	regulation of cysteine-type endopeptidase activity involved in apoptotic process	0.0625	0.011515801	0.006337434	0.017777815	0.008279223	4318/5468/7124/7422	4
	GO:0032689	negative regulation of interferon-gamma production	0.03125	0.001874665	0.006399209	0.017933815	0.008351873	9971/7099	2
	GO:0014896	muscle hypertrophy	0.046875	0.005945367	0.006549633	0.018337713	0.008539971	2539/5465/5747	3
	GO:0001938	positive regulation of endothelial cell proliferation	0.046875	0.005998929	0.006713632	0.018730497	0.008722892	185/3162/7422	3
	GO:0032411	positive regulation of transporter activity	0.046875	0.005998929	0.006713632	0.018730497	0.008722892	154/6347/5444	3
	GO:0060419	heart growth	0.046875	0.005998929	0.006713632	0.018730497	0.008722892	2539/5465/6256	3
	GO:0010573	vascular endothelial growth factor production	0.03125	0.001928227	0.00676075	0.018730497	0.008722892	3553/3569	2
	GO:0030224	monocyte differentiation	0.03125	0.001928227	0.00676075	0.018730497	0.008722892	5468/7422	2
	GO:0030947	regulation of vascular endothelial growth factor receptor signaling pathway	0.03125	0.001928227	0.00676075	0.018730497	0.008722892	3553/7422	2
	GO:0042554	superoxide anion generation	0.03125	0.001928227	0.00676075	0.018730497	0.008722892	1956/6647	2
	GO:0071392	cellular response to estradiol stimulus	0.03125	0.001928227	0.00676075	0.018730497	0.008722892	1956/2099	2
	GO:1901099	negative regulation of signal transduction in absence of ligand	0.03125	0.001928227	0.00676075	0.018730497	0.008722892	3553/7124	2
	GO:1903131	mononuclear cell differentiation	0.03125	0.001928227	0.00676075	0.018730497	0.008722892	5468/7422	2
	GO:2001240	negative regulation of extrinsic apoptotic signaling pathway in absence of ligand	0.03125	0.001928227	0.00676075	0.018730497	0.008722892	3553/7124	2
	GO:2000146	negative regulation of cell motility	0.078125	0.018693091	0.006866523	0.018988713	0.008843145	6347/1588/3162/5467/5468	5
	GO:0043200	response to amino acid	0.046875	0.006052491	0.006880063	0.018988713	0.008843145	1956/2155/7124	3
	GO:0043244	regulation of protein-containing complex disassembly	0.046875	0.006052491	0.006880063	0.018988713	0.008843145	154/3643/7124	3
	GO:0060964	regulation of gene silencing by miRNA	0.046875	0.006052491	0.006880063	0.018988713	0.008843145	1956/2099/5468	3
	GO:0030218	erythrocyte differentiation	0.046875	0.006106052	0.007048936	0.019399579	0.009034488	2539/3718/7422	3
	GO:0042752	regulation of circadian rhythm	0.046875	0.006106052	0.007048936	0.019399579	0.009034488	10062/5465/5468	3
	GO:0045446	endothelial cell differentiation	0.046875	0.006106052	0.007048936	0.019399579	0.009034488	3553/7124/7422	3
	GO:0007431	salivary gland development	0.03125	0.001981789	0.007131383	0.019534081	0.009097126	1956/7124	2
	GO:0010614	negative regulation of cardiac muscle hypertrophy	0.03125	0.001981789	0.007131383	0.019534081	0.009097126	2539/5465	2
	GO:0034405	response to fluid shear stress	0.03125	0.001981789	0.007131383	0.019534081	0.009097126	4846/6721	2
	GO:0045730	respiratory burst	0.03125	0.001981789	0.007131383	0.019534081	0.009097126	3630/3643	2
	GO:0090050	positive regulation of cell migration involved in sprouting angiogenesis	0.03125	0.001981789	0.007131383	0.019534081	0.009097126	3162/7422	2
	GO:0002446	neutrophil mediated immunity	0.09375	0.02672737	0.007161424	0.019597914	0.009126853	240/847/3569/8972/4318/7077	6
	GO:1904375	regulation of protein localization to cell periphery	0.046875	0.006159614	0.00722026	0.019740353	0.009193188	1956/3630/7124	3
	GO:0031589	cell-substrate adhesion	0.078125	0.0189609	0.007280385	0.019886046	0.009261038	335/5467/5747/7412/7422	5
	GO:0097191	extrinsic apoptotic signaling pathway	0.0625	0.011997858	0.007306933	0.019939838	0.009286089	3162/3553/4846/7124	4
	GO:0001505	regulation of neurotransmitter levels	0.078125	0.019014462	0.007365208	0.020080028	0.009351377	3553/3643/4846/7099/7124	5
	GO:0003298	physiological muscle hypertrophy	0.03125	0.002035351	0.007511044	0.020306345	0.009456774	2539/5465	2
	GO:0003301	physiological cardiac muscle hypertrophy	0.03125	0.002035351	0.007511044	0.020306345	0.009456774	2539/5465	2
	GO:0016572	histone phosphorylation	0.03125	0.002035351	0.007511044	0.020306345	0.009456774	3553/5595	2
	GO:0032094	response to food	0.03125	0.002035351	0.007511044	0.020306345	0.009456774	2539/5465	2
	GO:0032350	regulation of hormone metabolic process	0.03125	0.002035351	0.007511044	0.020306345	0.009456774	3553/7124	2
	GO:0046326	positive regulation of glucose import	0.03125	0.002035351	0.007511044	0.020306345	0.009456774	3630/3643	2
	GO:0061049	cell growth involved in cardiac muscle cell development	0.03125	0.002035351	0.007511044	0.020306345	0.009456774	2539/5465	2
	GO:1904037	positive regulation of epithelial cell apoptotic process	0.03125	0.002035351	0.007511044	0.020306345	0.009456774	6347/3569	2
	GO:1904706	negative regulation of vascular smooth muscle cell proliferation	0.03125	0.002035351	0.007511044	0.020306345	0.009456774	3162/5468	2
	GO:0060147	regulation of posttranscriptional gene silencing	0.046875	0.006266738	0.007570292	0.020428553	0.009513686	1956/2099/5468	3
	GO:0060966	regulation of gene silencing by RNA	0.046875	0.006266738	0.007570292	0.020428553	0.009513686	1956/2099/5468	3
	GO:0045861	negative regulation of proteolysis	0.078125	0.019175147	0.007623831	0.02053493	0.009563227	3630/4318/5327/7077/7422	5
	GO:0045862	positive regulation of proteolysis	0.078125	0.019175147	0.007623831	0.02053493	0.009563227	3553/5595/5468/5747/7124	5
	GO:0002460	adaptive immune response based on somatic recombination of immune receptors built from immunoglobulin superfamily domains	0.078125	0.019335833	0.007888743	0.021121449	0.009836372	3553/3569/3718/7099/7124	5
	GO:0010661	positive regulation of muscle cell apoptotic process	0.03125	0.002088913	0.007899669	0.021121449	0.009836372	3156/5468	2
	GO:0014741	negative regulation of muscle hypertrophy	0.03125	0.002088913	0.007899669	0.021121449	0.009836372	2539/5465	2
	GO:0032692	negative regulation of interleukin-1 production	0.03125	0.002088913	0.007899669	0.021121449	0.009836372	335/9971	2
	GO:0043114	regulation of vascular permeability	0.03125	0.002088913	0.007899669	0.021121449	0.009836372	3569/7422	2
	GO:0045684	positive regulation of epidermis development	0.03125	0.002088913	0.007899669	0.021121449	0.009836372	5467/7124	2
	GO:1902042	negative regulation of extrinsic apoptotic signaling pathway via death domain receptors	0.03125	0.002088913	0.007899669	0.021121449	0.009836372	3162/4846	2
	GO:1905521	regulation of macrophage migration	0.03125	0.002088913	0.007899669	0.021121449	0.009836372	1588/5595	2
	GO:0007173	epidermal growth factor receptor signaling pathway	0.046875	0.006373862	0.007930227	0.021183684	0.009865355	1956/4318/5747	3
	GO:0010508	positive regulation of autophagy	0.046875	0.006427424	0.008113928	0.021654512	0.010084622	154/3162/5595	3
	GO:0002369	T cell cytokine production	0.03125	0.002142475	0.008297193	0.022042498	0.010265309	3553/3569	2
	GO:0044003	modulation by symbiont of host process	0.03125	0.002142475	0.008297193	0.022042498	0.010265309	3643/6256	2
	GO:0044058	regulation of digestive system process	0.03125	0.002142475	0.008297193	0.022042498	0.010265309	335/10062	2
	GO:0045124	regulation of bone resorption	0.03125	0.002142475	0.008297193	0.022042498	0.010265309	1956/3569	2
	GO:0071548	response to dexamethasone	0.03125	0.002142475	0.008297193	0.022042498	0.010265309	1956/2908	2
	GO:0048738	cardiac muscle tissue development	0.0625	0.012479914	0.008369882	0.022215317	0.010345792	2539/5465/6256/7422	4
	GO:0071453	cellular response to oxygen levels	0.0625	0.012533476	0.00849391	0.022523961	0.010489529	3162/5467/5468/7422	4
	GO:0051928	positive regulation of calcium ion transport	0.046875	0.006588109	0.008680057	0.02297517	0.010699659	6347/2539/2641	3
	GO:0071621	granulocyte chemotaxis	0.046875	0.006588109	0.008680057	0.02297517	0.010699659	6347/3553/5595	3
	GO:0042572	retinol metabolic process	0.03125	0.002196036	0.008703554	0.02297517	0.010699659	231/1576	2
	GO:0090279	regulation of calcium ion import	0.03125	0.002196036	0.008703554	0.02297517	0.010699659	6347/2641	2
	GO:1900117	regulation of execution phase of apoptosis	0.03125	0.002196036	0.008703554	0.02297517	0.010699659	2641/3569	2
	GO:0019751	polyol metabolic process	0.046875	0.006641671	0.008873799	0.02338214	0.010889188	231/1576/6652	3
	GO:0051101	regulation of DNA binding	0.046875	0.006641671	0.008873799	0.02338214	0.010889188	3162/4318/5468	3
	GO:0001701	in utero embryonic development	0.078125	0.019978575	0.009012796	0.0237269	0.011049744	338/1956/4846/6256/7422	5
	GO:0046688	response to copper ion	0.03125	0.002249598	0.009118687	0.023962294	0.011159369	6647/6652	2
	GO:0051154	negative regulation of striated muscle cell differentiation	0.03125	0.002249598	0.009118687	0.023962294	0.011159369	2539/5465	2
	GO:2000116	regulation of cysteine-type endopeptidase activity	0.0625	0.012801285	0.009132171	0.023976071	0.011165784	4318/5468/7124/7422	4
	GO:0045667	regulation of osteoblast differentiation	0.046875	0.006748795	0.009268877	0.024313041	0.011322713	3569/5747/7124	3
	GO:0008631	intrinsic apoptotic signaling pathway in response to oxidative stress	0.03125	0.00230316	0.00954253	0.024963326	0.011625555	3630/6647	2
	GO:0055026	negative regulation of cardiac muscle tissue development	0.03125	0.00230316	0.00954253	0.024963326	0.011625555	2539/5465	2
	GO:1901985	positive regulation of protein acetylation	0.03125	0.00230316	0.00954253	0.024963326	0.011625555	3553/5595	2
	GO:0010595	positive regulation of endothelial cell migration	0.046875	0.006855919	0.009674122	0.025262137	0.011764712	3162/4846/7422	3
	GO:0034763	negative regulation of transmembrane transport	0.046875	0.006855919	0.009674122	0.025262137	0.011764712	3553/4318/7124	3
	GO:0031334	positive regulation of protein-containing complex assembly	0.0625	0.013069095	0.00980105	0.025570631	0.01190838	2099/7099/7124/7422	4
	GO:0040013	negative regulation of locomotion	0.078125	0.02040707	0.009821105	0.025599996	0.011922055	6347/1588/3162/5467/5468	5
	GO:0030225	macrophage differentiation	0.03125	0.002356722	0.00997502	0.025931486	0.012076432	4318/7422	2
	GO:0044060	regulation of endocrine process	0.03125	0.002356722	0.00997502	0.025931486	0.012076432	185/3553	2
	GO:0070266	necroptotic process	0.03125	0.002356722	0.00997502	0.025931486	0.012076432	7099/7124	2
	GO:0030518	intracellular steroid hormone receptor signaling pathway	0.046875	0.006963042	0.010089587	0.026205901	0.012204228	2099/2100/2908	3
	GO:0051271	negative regulation of cellular component movement	0.078125	0.020567756	0.010136721	0.026304836	0.012250303	6347/1588/3162/5467/5468	5
	GO:0032365	intracellular lipid transport	0.03125	0.002410284	0.010416095	0.026981674	0.01256551	1066/3949	2
	GO:0048538	thymus development	0.03125	0.002410284	0.010416095	0.026981674	0.01256551	5595/6647	2
	GO:0003158	endothelium development	0.046875	0.007070166	0.010515322	0.027190285	0.012662661	3553/7124/7422	3
	GO:0072329	monocarboxylic acid catabolic process	0.046875	0.007070166	0.010515322	0.027190285	0.012662661	5465/5467/6652	3
	GO:0045787	positive regulation of cell cycle	0.078125	0.020835565	0.010678181	0.027586882	0.012847358	1019/1956/3553/3630/3643	5
	GO:0071333	cellular response to glucose stimulus	0.046875	0.007123728	0.010732055	0.027701462	0.012900719	2641/3156/9971	3
	GO:0014706	striated muscle tissue development	0.078125	0.020889127	0.010788812	0.027823275	0.012957448	2539/3156/5465/6256/7422	5
	GO:0035196	production of miRNAs involved in gene silencing by miRNA	0.03125	0.002463846	0.010865693	0.027922526	0.01300367	1956/2099	2
	GO:0043277	apoptotic cell clearance	0.03125	0.002463846	0.010865693	0.027922526	0.01300367	6347/10062	2
	GO:0050706	regulation of interleukin-1 beta secretion	0.03125	0.002463846	0.010865693	0.027922526	0.01300367	335/7099	2
	GO:0071675	regulation of mononuclear cell migration	0.03125	0.002463846	0.010865693	0.027922526	0.01300367	5595/7124	2
	GO:0031330	negative regulation of cellular catabolic process	0.0625	0.013551152	0.011083941	0.028433142	0.013241466	3162/3630/5747/7077	4
	GO:2000027	regulation of animal organ morphogenesis	0.0625	0.013551152	0.011083941	0.028433142	0.013241466	2099/6256/7124/7422	4
	GO:0071331	cellular response to hexose stimulus	0.046875	0.007230852	0.011173281	0.02863707	0.013336437	2641/3156/9971	3
	GO:0051924	regulation of calcium ion transport	0.0625	0.013604713	0.011232853	0.02876441	0.013395739	6347/2539/2641/4846	4
	GO:0031952	regulation of protein autophosphorylation	0.03125	0.002517408	0.011323751	0.028819591	0.013421437	3630/7422	2
	GO:0048806	genitalia development	0.03125	0.002517408	0.011323751	0.028819591	0.013421437	1588/2099	2
	GO:0060986	endocrine hormone secretion	0.03125	0.002517408	0.011323751	0.028819591	0.013421437	185/3553	2
	GO:0070849	response to epidermal growth factor	0.03125	0.002517408	0.011323751	0.028819591	0.013421437	1956/5595	2
	GO:1900744	regulation of p38MAPK cascade	0.03125	0.002517408	0.011323751	0.028819591	0.013421437	3553/7422	2
	GO:1903580	positive regulation of ATP metabolic process	0.03125	0.002517408	0.011323751	0.028819591	0.013421437	3630/3643	2
	GO:2001239	regulation of extrinsic apoptotic signaling pathway in absence of ligand	0.03125	0.002517408	0.011323751	0.028819591	0.013421437	3553/7124	2
	GO:0002705	positive regulation of leukocyte mediated immunity	0.046875	0.007284413	0.011397785	0.028957342	0.013485589	3553/3569/7124	3
	GO:0071326	cellular response to monosaccharide stimulus	0.046875	0.007284413	0.011397785	0.028957342	0.013485589	2641/3156/9971	3
	GO:0007611	learning or memory	0.0625	0.013711837	0.011534548	0.029279232	0.013635495	1956/3156/3643/3949	4
	GO:1903670	regulation of sprouting angiogenesis	0.046875	0.007337975	0.01162489	0.029482829	0.013730311	185/3162/7422	3
	GO:0002711	positive regulation of T cell mediated immunity	0.03125	0.002570969	0.01179021	0.029643665	0.013805213	3553/3569	2
	GO:0007595	lactation	0.03125	0.002570969	0.01179021	0.029643665	0.013805213	5617/7422	2
	GO:0009311	oligosaccharide metabolic process	0.03125	0.002570969	0.01179021	0.029643665	0.013805213	673/8972	2
	GO:0045806	negative regulation of endocytosis	0.03125	0.002570969	0.01179021	0.029643665	0.013805213	7376/10062	2
	GO:0046850	regulation of bone remodeling	0.03125	0.002570969	0.01179021	0.029643665	0.013805213	1956/3569	2
	GO:0051972	regulation of telomerase activity	0.03125	0.002570969	0.01179021	0.029643665	0.013805213	5595/5468	2
	GO:0072604	interleukin-6 secretion	0.03125	0.002570969	0.01179021	0.029643665	0.013805213	3553/7124	2
	GO:0101023	vascular endothelial cell proliferation	0.03125	0.002570969	0.01179021	0.029643665	0.013805213	6347/5468	2
	GO:1903727	positive regulation of phospholipid metabolic process	0.03125	0.002570969	0.01179021	0.029643665	0.013805213	9971/5747	2
	GO:1905562	regulation of vascular endothelial cell proliferation	0.03125	0.002570969	0.01179021	0.029643665	0.013805213	6347/5468	2
	GO:0009150	purine ribonucleotide metabolic process	0.078125	0.021371184	0.011820153	0.029693285	0.013828321	2645/3156/3630/3643/5465	5
	GO:0009308	amine metabolic process	0.046875	0.007391537	0.011854601	0.029728477	0.01384471	3630/9971/7412	3
	GO:0046631	alpha-beta T cell activation	0.046875	0.007391537	0.011854601	0.029728477	0.01384471	3569/3630/3718	3
	GO:0060968	regulation of gene silencing	0.046875	0.007445099	0.012086922	0.030284976	0.014103875	1956/2099/5468	3
	GO:0008654	phospholipid biosynthetic process	0.0625	0.013926085	0.012153532	0.030425667	0.014169396	335/1798/9971/5467	4
	GO:0002704	negative regulation of leukocyte mediated immunity	0.03125	0.002624531	0.012265007	0.030547007	0.014225905	3162/3718	2
	GO:0030857	negative regulation of epithelial cell differentiation	0.03125	0.002624531	0.012265007	0.030547007	0.014225905	4318/7422	2
	GO:0043124	negative regulation of I-kappaB kinase/NF-kappaB signaling	0.03125	0.002624531	0.012265007	0.030547007	0.014225905	2099/9971	2
	GO:0061912	selective autophagy	0.03125	0.002624531	0.012265007	0.030547007	0.014225905	154/5595	2
	GO:0097300	programmed necrotic cell death	0.03125	0.002624531	0.012265007	0.030547007	0.014225905	7099/7124	2
	GO:1904707	positive regulation of vascular smooth muscle cell proliferation	0.03125	0.002624531	0.012265007	0.030547007	0.014225905	4318/7124	2
	GO:0046330	positive regulation of JNK cascade	0.046875	0.007498661	0.012321859	0.030662352	0.014279621	3553/7099/7124	3
	GO:0097530	granulocyte migration	0.046875	0.007552223	0.012559417	0.03122679	0.014542483	6347/3553/5595	3
	GO:0009409	response to cold	0.03125	0.002678093	0.012748082	0.031560995	0.014698124	154/5468	2
	GO:0010718	positive regulation of epithelial to mesenchymal transition	0.03125	0.002678093	0.012748082	0.031560995	0.014698124	3553/3569	2
	GO:0060425	lung morphogenesis	0.03125	0.002678093	0.012748082	0.031560995	0.014698124	5595/7124	2
	GO:1903793	positive regulation of anion transport	0.03125	0.002678093	0.012748082	0.031560995	0.014698124	335/3553	2
	GO:2000725	regulation of cardiac muscle cell differentiation	0.03125	0.002678093	0.012748082	0.031560995	0.014698124	2539/5465	2
	GO:0038127	ERBB signaling pathway	0.046875	0.007605785	0.012799599	0.031661594	0.014744973	1956/4318/5747	3
	GO:0060537	muscle tissue development	0.078125	0.02185324	0.012916987	0.031924821	0.01486756	2539/3156/5465/6256/7422	5
	GO:0019369	arachidonic acid metabolic process	0.03125	0.002731655	0.013239374	0.032583196	0.015174169	1564/5595	2
	GO:0031050	dsRNA processing	0.03125	0.002731655	0.013239374	0.032583196	0.015174169	1956/2099	2
	GO:0045599	negative regulation of fat cell differentiation	0.03125	0.002731655	0.013239374	0.032583196	0.015174169	3569/7124	2
	GO:0048260	positive regulation of receptor-mediated endocytosis	0.03125	0.002731655	0.013239374	0.032583196	0.015174169	6401/7422	2
	GO:0070918	production of small RNA involved in gene silencing by RNA	0.03125	0.002731655	0.013239374	0.032583196	0.015174169	1956/2099	2
	GO:0071322	cellular response to carbohydrate stimulus	0.046875	0.007712908	0.013287855	0.032647273	0.01520401	2641/3156/9971	3
	GO:1904064	positive regulation of cation transmembrane transport	0.046875	0.007712908	0.013287855	0.032647273	0.01520401	154/6347/2539	3
	GO:0022898	regulation of transmembrane transporter activity	0.0625	0.01435458	0.013454745	0.033029412	0.015381973	154/6347/3630/4318	4
	GO:0009259	ribonucleotide metabolic process	0.078125	0.022174612	0.013685487	0.033567521	0.015632574	2645/3156/3630/3643/5465	5
	GO:0032653	regulation of interleukin-10 production	0.03125	0.002785217	0.013738823	0.033641613	0.015667079	3718/7099	2
	GO:1900024	regulation of substrate adhesion-dependent cell spreading	0.03125	0.002785217	0.013738823	0.033641613	0.015667079	335/5747	2
	GO:0055123	digestive system development	0.046875	0.007820032	0.013786661	0.033730359	0.015708409	1956/3643/7124	3
	GO:0043524	negative regulation of neuron apoptotic process	0.046875	0.007873594	0.01404003	0.034321384	0.015983652	6347/3162/6647	3
	GO:1902105	regulation of leukocyte differentiation	0.0625	0.014568827	0.01413745	0.034530515	0.016081045	3718/6647/7099/7124	4
	GO:0000186	activation of MAPKK activity	0.03125	0.002838779	0.01424637	0.03459323	0.016110252	1956/5595	2
	GO:0030195	negative regulation of blood coagulation	0.03125	0.002838779	0.01424637	0.03459323	0.016110252	4846/5327	2
	GO:0035065	regulation of histone acetylation	0.03125	0.002838779	0.01424637	0.03459323	0.016110252	3553/5595	2
	GO:0038066	p38MAPK cascade	0.03125	0.002838779	0.01424637	0.03459323	0.016110252	3553/7422	2
	GO:0045661	regulation of myoblast differentiation	0.03125	0.002838779	0.01424637	0.03459323	0.016110252	5467/7124	2
	GO:0050702	interleukin-1 beta secretion	0.03125	0.002838779	0.01424637	0.03459323	0.016110252	335/7099	2
	GO:0050704	regulation of interleukin-1 secretion	0.03125	0.002838779	0.01424637	0.03459323	0.016110252	335/7099	2
	GO:0061448	connective tissue development	0.0625	0.014622389	0.014311509	0.034693484	0.016156941	1019/5595/9971/5467	4
	GO:0098742	cell-cell adhesion via plasma-membrane adhesion molecules	0.0625	0.014622389	0.014311509	0.034693484	0.016156941	335/6401/6403/7412	4
	GO:0002706	regulation of lymphocyte mediated immunity	0.046875	0.007980718	0.014554717	0.035224353	0.016404169	3553/3569/7124	3
	GO:0014074	response to purine-containing compound	0.046875	0.007980718	0.014554717	0.035224353	0.016404169	3553/5468/6647	3
	GO:0006636	unsaturated fatty acid biosynthetic process	0.03125	0.002892341	0.014761954	0.035577899	0.016568818	240/3553	2
	GO:0032655	regulation of interleukin-12 production	0.03125	0.002892341	0.014761954	0.035577899	0.016568818	3718/7099	2
	GO:0032663	regulation of interleukin-2 production	0.03125	0.002892341	0.014761954	0.035577899	0.016568818	3553/9971	2
	GO:0046164	alcohol catabolic process	0.03125	0.002892341	0.014761954	0.035577899	0.016568818	217/6652	2
	GO:1900047	negative regulation of hemostasis	0.03125	0.002892341	0.014761954	0.035577899	0.016568818	4846/5327	2
	GO:0008360	regulation of cell shape	0.046875	0.00803428	0.014816043	0.035649189	0.016602018	6347/5747/7422	3
	GO:0048754	branching morphogenesis of an epithelial tube	0.046875	0.00803428	0.014816043	0.035649189	0.016602018	2099/7124/7422	3
	GO:0006417	regulation of translation	0.078125	0.02271023	0.015034187	0.036144173	0.016832534	1019/3569/5595/6256/7124	5
	GO:0052548	regulation of endopeptidase activity	0.078125	0.022763792	0.015173795	0.036449686	0.016974814	4318/5468/7077/7124/7422	5
	GO:0002090	regulation of receptor internalization	0.03125	0.002945903	0.015285517	0.036597176	0.0170435	6401/7422	2
	GO:0032613	interleukin-10 production	0.03125	0.002945903	0.015285517	0.036597176	0.0170435	3718/7099	2
	GO:0043954	cellular component maintenance	0.03125	0.002945903	0.015285517	0.036597176	0.0170435	3630/3643	2
	GO:0046456	icosanoid biosynthetic process	0.03125	0.002945903	0.015285517	0.036597176	0.0170435	240/3553	2
	GO:0016202	regulation of striated muscle tissue development	0.046875	0.008141403	0.015346675	0.036713385	0.01709762	2539/3156/5465	3
	GO:0048568	embryonic organ development	0.078125	0.022924478	0.015597854	0.037283613	0.017363178	1956/5595/6647/7124/7422	5
	GO:0006749	glutathione metabolic process	0.03125	0.002999464	0.015816999	0.037683579	0.017549444	2539/6647	2
	GO:0032615	interleukin-12 production	0.03125	0.002999464	0.015816999	0.037683579	0.017549444	3718/7099	2
	GO:0090183	regulation of kidney development	0.03125	0.002999464	0.015816999	0.037683579	0.017549444	4318/7422	2
	GO:1903078	positive regulation of protein localization to plasma membrane	0.03125	0.002999464	0.015816999	0.037683579	0.017549444	1956/7124	2
	GO:1901861	regulation of muscle tissue development	0.046875	0.008302089	0.016162618	0.038475496	0.017918244	2539/3156/5465	3
	GO:0050819	negative regulation of coagulation	0.03125	0.003053026	0.016356342	0.038873039	0.018103382	4846/5327	2
	GO:0051055	negative regulation of lipid biosynthetic process	0.03125	0.003053026	0.016356342	0.038873039	0.018103382	9971/6647	2
	GO:0034767	positive regulation of ion transmembrane transport	0.046875	0.008355651	0.016439943	0.039007989	0.018166229	154/6347/2539	3
	GO:0048634	regulation of muscle organ development	0.046875	0.008355651	0.016439943	0.039007989	0.018166229	2539/3156/5465	3
	GO:0006816	calcium ion transport	0.078125	0.023245849	0.016469722	0.039046797	0.018184302	6347/2539/2641/2645/4846	5
	GO:0051348	negative regulation of transferase activity	0.0625	0.015265131	0.016507254	0.039103911	0.0182109	2167/3156/3553/5468	4
	GO:0015980	energy derivation by oxidation of organic compounds	0.0625	0.015318693	0.016699251	0.039526544	0.018407723	847/2645/3630/3643	4
	GO:0017001	antibiotic catabolic process	0.03125	0.003106588	0.016903488	0.039815584	0.01854233	217/847	2
	GO:0019229	regulation of vasoconstriction	0.03125	0.003106588	0.016903488	0.039815584	0.01854233	185/1956	2
	GO:0030520	intracellular estrogen receptor signaling pathway	0.03125	0.003106588	0.016903488	0.039815584	0.01854233	2099/2100	2
	GO:0042093	T-helper cell differentiation	0.03125	0.003106588	0.016903488	0.039815584	0.01854233	3569/3718	2
	GO:0071385	cellular response to glucocorticoid stimulus	0.03125	0.003106588	0.016903488	0.039815584	0.01854233	1956/2908	2
	GO:1902041	regulation of extrinsic apoptotic signaling pathway via death domain receptors	0.03125	0.003106588	0.016903488	0.039815584	0.01854233	3162/4846	2
	GO:0010656	negative regulation of muscle cell apoptotic process	0.03125	0.00316015	0.017458378	0.040956791	0.019073797	3156/3162	2
	GO:0043388	positive regulation of DNA binding	0.03125	0.00316015	0.017458378	0.040956791	0.019073797	4318/5468	2
	GO:0045843	negative regulation of striated muscle tissue development	0.03125	0.00316015	0.017458378	0.040956791	0.019073797	2539/5465	2
	GO:2000351	regulation of endothelial cell apoptotic process	0.03125	0.00316015	0.017458378	0.040956791	0.019073797	6347/7124	2
	GO:2000756	regulation of peptidyl-lysine acetylation	0.03125	0.00316015	0.017458378	0.040956791	0.019073797	3553/5595	2
	GO:0046661	male sex differentiation	0.046875	0.008569898	0.017576025	0.041199563	0.019186856	268/2099/3643	3
	GO:0002294	CD4-positive, alpha-beta T cell differentiation involved in immune response	0.03125	0.003213712	0.018020955	0.04203926	0.019577908	3569/3718	2
	GO:0033013	tetrapyrrole metabolic process	0.03125	0.003213712	0.018020955	0.04203926	0.019577908	3162/4552	2
	GO:0048635	negative regulation of muscle organ development	0.03125	0.003213712	0.018020955	0.04203926	0.019577908	2539/5465	2
	GO:0051893	regulation of focal adhesion assembly	0.03125	0.003213712	0.018020955	0.04203926	0.019577908	5747/7422	2
	GO:0090109	regulation of cell-substrate junction assembly	0.03125	0.003213712	0.018020955	0.04203926	0.019577908	5747/7422	2
	GO:0150116	regulation of cell-substrate junction organization	0.03125	0.003213712	0.018020955	0.04203926	0.019577908	5747/7422	2
	GO:0051146	striated muscle cell differentiation	0.0625	0.015693626	0.018082654	0.042149393	0.019629197	2539/5465/6256/7422	4
	GO:0031214	biomineral tissue development	0.046875	0.008730584	0.018456269	0.04295143	0.020002711	154/4846/5465	3
	GO:0110148	biomineralization	0.046875	0.008730584	0.018456269	0.04295143	0.020002711	154/4846/5465	3
	GO:0002287	alpha-beta T cell activation involved in immune response	0.03125	0.003267274	0.018591161	0.043127341	0.020084633	3569/3718	2
	GO:0002293	alpha-beta T cell differentiation involved in immune response	0.03125	0.003267274	0.018591161	0.043127341	0.020084633	3569/3718	2
	GO:0050701	interleukin-1 secretion	0.03125	0.003267274	0.018591161	0.043127341	0.020084633	335/7099	2
	GO:0071384	cellular response to corticosteroid stimulus	0.03125	0.003267274	0.018591161	0.043127341	0.020084633	1956/2908	2
	GO:0007088	regulation of mitotic nuclear division	0.046875	0.008784146	0.018755062	0.04347289	0.020245557	3553/3630/3643	3
	GO:2001242	regulation of intrinsic apoptotic signaling pathway	0.046875	0.008837708	0.019056547	0.044136541	0.020554623	3630/4318/6647	3
	GO:0006521	regulation of cellular amino acid metabolic process	0.03125	0.003320836	0.019168939	0.044255906	0.020610212	3630/9971	2
	GO:0032623	interleukin-2 production	0.03125	0.003320836	0.019168939	0.044255906	0.020610212	3553/9971	2
	GO:0070265	necrotic cell death	0.03125	0.003320836	0.019168939	0.044255906	0.020610212	7099/7124	2
	GO:1901862	negative regulation of muscle tissue development	0.03125	0.003320836	0.019168939	0.044255906	0.020610212	2539/5465	2
	GO:0016570	histone modification	0.078125	0.024317086	0.019610049	0.045238408	0.021067768	2641/3553/5595/9971/7422	5
	GO:0033209	tumor necrosis factor-mediated signaling pathway	0.046875	0.008944831	0.019667597	0.045335214	0.021112852	335/9971/7124	3
	GO:0002637	regulation of immunoglobulin production	0.03125	0.003374397	0.019754232	0.045355217	0.021122167	3569/7124	2
	GO:0006879	cellular iron ion homeostasis	0.03125	0.003374397	0.019754232	0.045355217	0.021122167	3162/6647	2
	GO:0007588	excretion	0.03125	0.003374397	0.019754232	0.045355217	0.021122167	185/3162	2
	GO:0046888	negative regulation of hormone secretion	0.03125	0.003374397	0.019754232	0.045355217	0.021122167	3156/3553	2
	GO:1904377	positive regulation of protein localization to cell periphery	0.03125	0.003374397	0.019754232	0.045355217	0.021122167	1956/7124	2
	GO:0051302	regulation of cell division	0.046875	0.008998393	0.019977165	0.045830895	0.021343692	847/3553/7422	3
	GO:0010469	regulation of signaling receptor activity	0.046875	0.009051955	0.02028943	0.046459477	0.021636427	154/6347/2100	3
	GO:0030307	positive regulation of cell growth	0.046875	0.009051955	0.02028943	0.046459477	0.021636427	1956/3630/7422	3
	GO:0045670	regulation of osteoclast differentiation	0.03125	0.003427959	0.020346983	0.046459477	0.021636427	7099/7124	2
	GO:0050922	negative regulation of chemotaxis	0.03125	0.003427959	0.020346983	0.046459477	0.021636427	6347/1588	2
	GO:1900449	regulation of glutamate receptor signaling pathway	0.03125	0.003427959	0.020346983	0.046459477	0.021636427	154/6347	2
	GO:2000378	negative regulation of reactive oxygen species metabolic process	0.03125	0.003427959	0.020346983	0.046459477	0.021636427	2539/3630	2
	GO:0046034	ATP metabolic process	0.0625	0.016282807	0.020397738	0.046538839	0.021673386	2645/3630/3643/5465	4
	GO:0045088	regulation of innate immune response	0.0625	0.016336369	0.020616857	0.04700191	0.021889041	3630/7376/10062/5468	4
	GO:0016241	regulation of macroautophagy	0.046875	0.009159079	0.020922054	0.047494327	0.022118362	154/3162/5595	3
	GO:0002548	monocyte chemotaxis	0.03125	0.003481521	0.020947137	0.047494327	0.022118362	6347/3569	2
	GO:0006940	regulation of smooth muscle contraction	0.03125	0.003481521	0.020947137	0.047494327	0.022118362	154/6647	2
	GO:0014823	response to activity	0.03125	0.003481521	0.020947137	0.047494327	0.022118362	847/5467	2
	GO:0051148	negative regulation of muscle cell differentiation	0.03125	0.003481521	0.020947137	0.047494327	0.022118362	2539/5465	2
	GO:0051187	cofactor catabolic process	0.03125	0.003481521	0.020947137	0.047494327	0.022118362	847/3162	2
	GO:0072577	endothelial cell apoptotic process	0.03125	0.003481521	0.020947137	0.047494327	0.022118362	6347/7124	2
	GO:0055002	striated muscle cell development	0.046875	0.009266202	0.021565476	0.048858232	0.02275354	2539/5465/7422	3
	GO:0042113	B cell activation	0.0625	0.016604178	0.021734305	0.049202408	0.022913824	3569/3718/7099/7412	4
	GO:0042326	negative regulation of phosphorylation	0.078125	0.025066952	0.02202901	0.049830785	0.023206463	2167/3156/3553/5465/7099	5
				.
GO-CC	ID	Description	GeneRatio	BgRatio	pvalue	p.adjust	qvalue	geneID	Count
	GO:0031983	vesicle lumen	0.138461538	0.016584673	1.20E-06	9.88E-05	6.68E-05	240/335/338/847/1956/2641/3630/7077/7422	9
	GO:0090575	RNA polymerase II transcription regulator complex	0.107692308	0.008419131	1.22E-06	9.88E-05	6.68E-05	7376/10062/9971/5465/5467/5468/6256	7
	GO:0034358	plasma lipoprotein particle	0.061538462	0.001876553	6.55E-06	0.000214299	0.000144815	335/338/3949/5444	4
	GO:1990777	lipoprotein particle	0.061538462	0.001876553	6.55E-06	0.000214299	0.000144815	335/338/3949/5444	4
	GO:0005901	caveola	0.076923077	0.004057412	6.61E-06	0.000214299	0.000144815	3162/3643/5595/4846/6401	5
	GO:0032994	protein-lipid complex	0.061538462	0.001977989	8.11E-06	0.00021901	0.000147999	335/338/3949/5444	4
	GO:0034362	low-density lipoprotein particle	0.046153846	0.000710047	1.21E-05	0.000280686	0.000189677	335/338/3949	3
	GO:0005769	early endosome	0.123076923	0.017751179	1.90E-05	0.000385362	0.000260414	154/335/338/1956/3949/5595/7099/7412	8
	GO:0044853	plasma membrane raft	0.076923077	0.005528224	2.99E-05	0.000537605	0.000363294	3162/3643/5595/4846/6401	5
	GO:0005667	transcription regulator complex	0.123076923	0.021047827	6.37E-05	0.000950602	0.000642382	1019/7376/10062/9971/5465/5467/5468/6256	8
	GO:0005788	endoplasmic reticulum lumen	0.107692308	0.015671755	6.94E-05	0.000950602	0.000642382	335/338/1066/2155/2641/3569/3630	7
	GO:0045121	membrane raft	0.107692308	0.015976061	7.82E-05	0.000950602	0.000642382	1956/3162/3643/5595/4846/6401/7124	7
	GO:0098857	membrane microdomain	0.107692308	0.016026779	7.98E-05	0.000950602	0.000642382	1956/3162/3643/5595/4846/6401/7124	7
	GO:0034364	high-density lipoprotein particle	0.046153846	0.001318659	8.42E-05	0.000950602	0.000642382	335/338/5444	3
	GO:0034774	secretory granule lumen	0.107692308	0.016280367	8.80E-05	0.000950602	0.000642382	240/335/847/2641/3630/7077/7422	7
	GO:0060205	cytoplasmic vesicle lumen	0.107692308	0.016483238	9.51E-05	0.0009594	0.000648328	240/335/847/2641/3630/7077/7422	7
	GO:0098589	membrane region	0.107692308	0.016635391	0.000100678	0.0009594	0.000648328	1956/3162/3643/5595/4846/6401/7124	7
	GO:0031904	endosome lumen	0.046153846	0.0017244	0.000190209	0.001711885	0.001156829	338/3630/5617	3
	GO:0045177	apical part of cell	0.107692308	0.019475579	0.000265185	0.00226105	0.001527935	154/1956/3949/8972/5327/5747/7412	7
	GO:0009897	external side of plasma membrane	0.107692308	0.019932038	0.000305109	0.00247138	0.001670068	2690/3643/3949/6403/7099/7124/7412	7
	GO:0030662	coated vesicle membrane	0.076923077	0.009230613	0.000334664	0.002581691	0.001744612	154/338/1956/3949/6721	5
	GO:0030665	clathrin-coated vesicle membrane	0.061538462	0.00583253	0.00056522	0.004162078	0.00281258	154/338/1956/3949	4
	GO:0101002	ficolin-1-rich granule	0.061538462	0.006288989	0.000750198	0.005063835	0.003421954	240/847/4318/7077	4
	GO:1904813	ficolin-1-rich granule lumen	0.061538462	0.006288989	0.000750198	0.005063835	0.003421954	240/847/4318/7077	4
	GO:0042627	chylomicron	0.030769231	0.00065933	0.000815365	0.005283563	0.003570439	335/338	2
	GO:0034361	very-low-density lipoprotein particle	0.030769231	0.001014353	0.001956809	0.011321538	0.007650682	335/338	2
	GO:0034385	triglyceride-rich plasma lipoprotein particle	0.030769231	0.001014353	0.001956809	0.011321538	0.007650682	335/338	2
	GO:0071682	endocytic vesicle lumen	0.030769231	0.001014353	0.001956809	0.011321538	0.007650682	335/338	2
	GO:0030135	coated vesicle	0.076923077	0.014657402	0.002634115	0.01471471	0.009943664	154/338/1956/3949/6721	5
	GO:0031970	organelle envelope lumen	0.046153846	0.004463154	0.003073206	0.016595311	0.011214505	240/847/6647	3
	GO:0030139	endocytic vesicle	0.076923077	0.015367449	0.003226886	0.016863084	0.011395457	335/338/1956/3949/4846	5
	GO:0030136	clathrin-coated vesicle	0.061538462	0.009534919	0.003445049	0.017440561	0.011785694	154/338/1956/3949	4
	GO:0001891	phagocytic cup	0.030769231	0.001369377	0.00356164	0.017484416	0.01181533	7099/7124	2
	GO:0010008	endosome membrane	0.092307692	0.024293757	0.004906639	0.023378693	0.015798467	154/338/1956/3643/3949/7099	6
	GO:0000790	nuclear chromatin	0.076923077	0.019069838	0.007958401	0.036836027	0.024892442	2099/10062/9971/5467/6256	5
	GO:0030669	clathrin-coated endocytic vesicle membrane	0.030769231	0.002231577	0.009259963	0.041669833	0.028158952	338/3949	2
	GO:0005777	peroxisome	0.046153846	0.006796166	0.009864377	0.042053397	0.02841815	847/3156/6647	3
	GO:0042579	microbody	0.046153846	0.006796166	0.009864377	0.042053397	0.02841815	847/3156/6647	3
GO-MF	ID	Description	GeneRatio	BgRatio	pvalue	p.adjust	qvalue	geneID	Count
	GO:0004879	nuclear receptor activity	0.153846154	0.002655967	1.01E-15	1.33E-13	8.01E-14	2099/2100/7376/10062/9971/2908/5465/5467/5468/6256	10
	GO:0098531	ligand-activated transcription factor activity	0.153846154	0.002655967	1.01E-15	1.33E-13	8.01E-14	2099/2100/7376/10062/9971/2908/5465/5467/5468/6256	10
	GO:0003707	steroid hormone receptor activity	0.153846154	0.003164557	6.76E-15	5.95E-13	3.58E-13	2099/2100/7376/10062/9971/2908/5465/5467/5468/6256	10
	GO:0005496	steroid binding	0.138461538	0.005368445	6.28E-11	4.14E-09	2.49E-09	335/1576/2099/2100/3290/10062/9971/2908/6462	9
	GO:0031406	carboxylic acid binding	0.153846154	0.01090642	2.01E-09	1.06E-07	6.38E-08	2169/2167/4846/9971/5465/5467/5468/6256/6401/6403	10
	GO:0033293	monocarboxylic acid binding	0.107692308	0.003616637	3.41E-09	1.36E-07	8.16E-08	2169/2167/9971/5465/5467/5468/6256	7
	GO:0043177	organic acid binding	0.153846154	0.011584539	3.59E-09	1.36E-07	8.16E-08	2169/2167/4846/9971/5465/5467/5468/6256/6401/6403	10
	GO:0005504	fatty acid binding	0.076923077	0.001921338	1.47E-07	4.29E-06	2.58E-06	2169/2167/5465/5467/5468	5
	GO:0036041	long-chain fatty acid binding	0.061538462	0.000791139	1.61E-07	4.29E-06	2.58E-06	2169/2167/5467/5468	4
	GO:0030374	nuclear receptor transcription coactivator activity	0.092307692	0.003786166	1.62E-07	4.29E-06	2.58E-06	7376/10062/9971/5465/5467/5468	6
	GO:0019902	phosphatase binding	0.123076923	0.01045434	3.72E-07	8.93E-06	5.38E-06	1956/3156/3718/5595/5465/5468/5747/6647	8
	GO:0020037	heme binding	0.107692308	0.007628843	6.19E-07	1.36E-05	8.21E-06	847/1588/1591/1564/1576/3162/4846	7
	GO:0046906	tetrapyrrole binding	0.107692308	0.008193942	1.00E-06	2.04E-05	1.23E-05	847/1588/1591/1564/1576/3162/4846	7
	GO:0050661	NADP binding	0.076923077	0.002938517	1.30E-06	2.45E-05	1.48E-05	847/2539/3156/4552/4846	5
	GO:0048018	receptor ligand activity	0.153846154	0.027237794	9.57E-06	0.000161957	9.75E-05	268/335/6347/2641/3553/3569/3630/5617/7124/7422	10
	GO:0001540	amyloid-beta binding	0.076923077	0.004407776	9.82E-06	0.000161957	9.75E-05	154/335/3643/3949/7099	5
	GO:0030546	signaling receptor activator activity	0.153846154	0.027520344	1.05E-05	0.000162603	9.79E-05	268/335/6347/2641/3553/3569/3630/5617/7124/7422	10
	GO:0042277	peptide binding	0.123076923	0.016670434	1.20E-05	0.000172222	0.00010369	154/335/2690/3643/3949/5468/6256/7099	8
	GO:0019903	protein phosphatase binding	0.092307692	0.007911392	1.24E-05	0.000172222	0.00010369	1956/3156/3718/5468/5747/6647	6
	GO:0003713	transcription coactivator activity	0.123076923	0.018026673	2.11E-05	0.000278628	0.000167754	2100/7376/10062/9971/5465/5467/5468/6256	8
	GO:0016705	oxidoreductase activity, acting on paired donors, with incorporation or reduction of molecular oxygen	0.092307692	0.008985081	2.55E-05	0.000320893	0.000193201	1588/1591/1564/1576/3162/4846	6
	GO:0004497	monooxygenase activity	0.076923077	0.005594485	3.13E-05	0.000376093	0.000226436	1588/1591/1564/1576/4846	5
	GO:0042562	hormone binding	0.076923077	0.005764014	3.62E-05	0.000415404	0.000250103	1956/2690/3643/2908/6462	5
	GO:0033218	amide binding	0.123076923	0.020117541	4.61E-05	0.000506846	0.000305158	154/335/2690/3643/3949/5468/6256/7099	8
	GO:0016616	oxidoreductase activity, acting on the CH-OH group of donors, NAD or NADP as acceptor	0.076923077	0.006724684	7.56E-05	0.000798783	0.000480926	231/2539/3156/3290/6652	5
	GO:0005126	cytokine receptor binding	0.107692308	0.016161844	8.36E-05	0.000849112	0.000511228	268/6347/3553/3569/5617/7124/7422	7
	GO:0050662	coenzyme binding	0.107692308	0.016444394	9.32E-05	0.000911131	0.000548568	217/847/2539/3156/4552/4846/6652	7
	GO:0016614	oxidoreductase activity, acting on CH-OH group of donors	0.076923077	0.007233273	0.00010683	0.001007258	0.000606443	231/2539/3156/3290/6652	5
	GO:0016712	oxidoreductase activity, acting on paired donors, with incorporation or reduction of molecular oxygen, reduced flavin or flavoprotein as one donor, and incorporation of one atom of oxygen	0.046153846	0.001808318	0.000217411	0.001979188	0.001191616	1588/1564/1576	3
	GO:0005506	iron ion binding	0.076923077	0.008589512	0.000238773	0.002101199	0.001265076	240/1588/1591/1564/1576	5
	GO:0001103	RNA polymerase II repressing transcription factor binding	0.046153846	0.001977848	0.000284639	0.00242402	0.001459438	5465/5467/5468	3
	GO:0008395	steroid hydroxylase activity	0.046153846	0.002147378	0.000364005	0.003003041	0.001808051	1588/1564/1576	3
	GO:0030246	carbohydrate binding	0.092307692	0.015314195	0.000472981	0.00378385	0.002278155	2539/2645/8972/6401/6403/6652	6
	GO:0061629	RNA polymerase II-specific DNA-binding transcription factor binding	0.092307692	0.015653255	0.000530893	0.004122231	0.002481886	2099/9971/5465/5467/5468/6256	6
	GO:0051427	hormone receptor binding	0.076923077	0.01045434	0.000588169	0.004436478	0.002671085	2099/2167/9971/5468/6256	5
	GO:0016922	nuclear receptor binding	0.061538462	0.006216094	0.000714843	0.005103324	0.003072575	2099/9971/5468/6256	4
	GO:0005536	glucose binding	0.030769231	0.000621609	0.000715239	0.005103324	0.003072575	2539/2645	2
	GO:0033691	sialic acid binding	0.030769231	0.000678119	0.000856254	0.00594871	0.00358156	6401/6403	2
	GO:0016653	oxidoreductase activity, acting on NAD(P)H, heme protein as acceptor	0.030769231	0.000734629	0.00100954	0.006833811	0.004114456	4552/4846	2
	GO:0005179	hormone activity	0.061538462	0.006894213	0.001052398	0.006945829	0.004181898	268/2641/3630/5617	4
	GO:0070330	aromatase activity	0.030769231	0.000791139	0.001175009	0.007565912	0.004555234	1588/1564	2
	GO:0002020	protease binding	0.061538462	0.007233273	0.001257383	0.00785223	0.004727619	3630/3949/7077/7124	4
	GO:0005125	cytokine activity	0.076923077	0.012432188	0.001278962	0.00785223	0.004727619	6347/3553/3569/7124/7422	5
	GO:0070492	oligosaccharide binding	0.030769231	0.000847649	0.001352571	0.008115429	0.004886083	6401/6403	2
	GO:0005178	integrin binding	0.061538462	0.007459313	0.001408633	0.008263983	0.004975524	1956/3553/7077/7412	4
	GO:0004713	protein tyrosine kinase activity	0.061538462	0.007572333	0.00148883	0.008308667	0.005002427	1956/3643/3718/5747	4
	GO:0005159	insulin-like growth factor receptor binding	0.030769231	0.000904159	0.001542139	0.008308667	0.005002427	3630/3643	2
	GO:0010181	FMN binding	0.030769231	0.000904159	0.001542139	0.008308667	0.005002427	4552/4846	2
	GO:0070402	NADPH binding	0.030769231	0.000904159	0.001542139	0.008308667	0.005002427	3156/4552	2
	GO:0046965	retinoid X receptor binding	0.030769231	0.000960669	0.001743624	0.009206333	0.005542888	9971/5468	2
	GO:0140297	DNA-binding transcription factor binding	0.092307692	0.019834991	0.001800846	0.009322024	0.005612542	2099/9971/5465/5467/5468/6256	6
	GO:0120020	cholesterol transfer activity	0.030769231	0.001017179	0.001956938	0.009935226	0.005981735	335/338	2
	GO:0120015	sterol transfer activity	0.030769231	0.001073689	0.002181996	0.010868811	0.006543822	335/338	2
	GO:0070491	repressing transcription factor binding	0.046153846	0.004012206	0.002262391	0.011060576	0.006659278	5465/5467/5468	3
	GO:0035257	nuclear hormone receptor binding	0.061538462	0.008589512	0.002359244	0.01132437	0.006818101	2099/9971/5468/6256	4
	GO:0048029	monosaccharide binding	0.046153846	0.004238246	0.002645144	0.012469966	0.007507835	2539/2645/6403	3
	GO:0001223	transcription coactivator binding	0.030769231	0.001299729	0.003197935	0.014811488	0.008917602	2099/5465	2
	GO:0042974	retinoic acid receptor binding	0.030769231	0.001469259	0.004079	0.018251795	0.01098892	9971/5468	2
	GO:0070325	lipoprotein particle receptor binding	0.030769231	0.001469259	0.004079	0.018251795	0.01098892	335/338	2
	GO:0015248	sterol transporter activity	0.030769231	0.001751808	0.005767629	0.025377569	0.015279158	335/338	2
	GO:0071813	lipoprotein particle binding	0.030769231	0.001864828	0.006518232	0.027755053	0.016710578	335/3949	2
	GO:0071814	protein-lipid complex binding	0.030769231	0.001864828	0.006518232	0.027755053	0.016710578	335/3949	2
	GO:0001530	lipopolysaccharide binding	0.030769231	0.001977848	0.007310809	0.030157089	0.01815678	6403/7099	2
	GO:0016620	oxidoreductase activity, acting on the aldehyde or oxo group of donors, NAD or NADP as acceptor	0.030769231	0.001977848	0.007310809	0.030157089	0.01815678	231/217	2
	GO:0019825	oxygen binding	0.030769231	0.002034358	0.007722639	0.031365796	0.018884511	1588/1576	2
	GO:0009055	electron transfer activity	0.046153846	0.006442134	0.008511729	0.034046916	0.020498741	231/217/1588	3
	GO:0120013	lipid transfer activity	0.030769231	0.002316908	0.009934056	0.039143147	0.023567046	335/338	2
	GO:0030331	estrogen receptor binding	0.030769231	0.002373418	0.01040625	0.040400734	0.024324206	2099/5468	2
	GO:0001221	transcription cofactor binding	0.030769231	0.002429928	0.010888234	0.041064196	0.024723659	2099/5465	2
	GO:0016903	oxidoreductase activity, acting on the aldehyde or oxo group of donors	0.030769231	0.002429928	0.010888234	0.041064196	0.024723659	231/217	2
	GO:0001217	DNA-binding transcription repressor activity	0.061538462	0.013675407	0.0120439	0.044160967	0.026588142	5465/5467/5468/6721	4
	GO:0001227	DNA-binding transcription repressor activity, RNA polymerase II-specific	0.061538462	0.013675407	0.0120439	0.044160967	0.026588142	5465/5467/5468/6721	4
	GO:0004715	non-membrane spanning protein tyrosine kinase activity	0.030769231	0.002599458	0.012392173	0.044247125	0.026640016	3718/5747	2
	GO:0005319	lipid transporter activity	0.046153846	0.007402803	0.012402603	0.044247125	0.026640016	335/338/2167	3
	GO:0070851	growth factor receptor binding	0.046153846	0.007572333	0.013178681	0.046388956	0.027929555	3553/3569/7422	3
	GO:0015485	cholesterol binding	0.030769231	0.002768987	0.013981517	0.047323706	0.028492343	335/10062	2
	GO:0017046	peptide hormone binding	0.030769231	0.002768987	0.013981517	0.047323706	0.028492343	2690/3643	2
	GO:0019838	growth factor binding	0.046153846	0.007741863	0.013982004	0.047323706	0.028492343	1956/2690/3643	3
	GO:0070888	E-box binding	0.030769231	0.002825497	0.014529932	0.048555722	0.029234107	5468/6721	2
KEGG	ID	Description	GeneRatio	BgRatio	pvalue	p.adjust	qvalue	geneID	Count
	hsa04933	AGE-RAGE signaling pathway in diabetic complications	0.183333333	0.012383901	1.24E-10	2.75E-08	1.35E-08	185/6347/1019/3553/3569/5595/4846/6401/7124/7412/7422	11
	hsa05144	Malaria	0.133333333	0.00619195	2.41E-09	2.67E-07	1.31E-07	6347/3553/3569/6401/6403/7099/7124/7412	8
	hsa05418	Fluid shear stress and atherosclerosis	0.183333333	0.017213622	4.41E-09	3.25E-07	1.59E-07	6347/3162/3553/4318/4846/5327/5747/6401/7124/7412/7422	11
	hsa01522	Endocrine resistance	0.15	0.012136223	3.49E-08	1.93E-06	9.46E-07	673/1019/1564/1956/2099/2100/5595/4318/5747	9
	hsa03320	PPAR signaling pathway	0.133333333	0.009535604	8.10E-08	3.27E-06	1.60E-06	335/2169/2167/10062/5465/5467/5468/6256	8
	hsa04066	HIF-1 signaling pathway	0.15	0.013498452	8.88E-08	3.27E-06	1.60E-06	1956/3162/3569/3630/3643/5595/4846/7099/7422	9
	hsa04151	PI3K-Akt signaling pathway	0.233333333	0.043839009	2.07E-07	6.54E-06	3.21E-06	1019/1956/2690/3569/3630/3643/3718/5595/4846/5617/5747/6256/7099/7422	14
	hsa05143	African trypanosomiasis	0.1	0.004582043	2.53E-07	7.00E-06	3.43E-06	335/3553/3569/6401/7124/7412	6
	hsa05219	Bladder cancer	0.1	0.005077399	4.79E-07	1.18E-05	5.77E-06	673/1019/1956/5595/4318/7422	6
	hsa04931	Insulin resistance	0.133333333	0.013374613	1.13E-06	2.51E-05	1.23E-05	3569/3630/3643/4846/7376/10062/5465/7124	8
	hsa04668	TNF signaling pathway	0.133333333	0.013869969	1.50E-06	3.01E-05	1.47E-05	6347/3553/3569/5595/4318/6401/7124/7412	8
	hsa05160	Hepatitis C	0.15	0.019442724	2.00E-06	3.68E-05	1.81E-05	673/1019/1956/3949/5595/10062/5465/6256/7124	9
	hsa04917	Prolactin signaling pathway	0.1	0.008668731	1.18E-05	0.000200953	9.86E-05	2099/2100/2645/3630/5595/5617	6
	hsa04932	Non-alcoholic fatty liver disease	0.133333333	0.018575851	1.33E-05	0.000205158	0.000100649	3553/3569/3630/3643/10062/5465/6256/7124	8
	hsa05223	Non-small cell lung cancer	0.1	0.008916409	1.39E-05	0.000205158	0.000100649	673/1019/1956/3718/5595/6256	6
	hsa05205	Proteoglycans in cancer	0.15	0.025386997	1.77E-05	0.00024432	0.000119861	673/1956/2099/5595/4318/5747/7099/7124/7422	9
	hsa04930	Type II diabetes mellitus	0.083333333	0.005696594	2.07E-05	0.000269729	0.000132327	2645/3630/3643/5595/7124	5
	hsa04913	Ovarian steroidogenesis	0.083333333	0.006315789	3.46E-05	0.000424331	0.000208174	240/1588/3630/3643/3949	5
	hsa05163	Human cytomegalovirus infection	0.15	0.027863777	3.70E-05	0.000430614	0.000211256	6347/1019/1956/3553/3569/5595/5747/7124/7422	9
	hsa05135	Yersinia infection	0.116666667	0.016099071	4.53E-05	0.000500473	0.000245528	6347/3553/3569/5595/5747/7099/7124	7
	hsa04068	FoxO signaling pathway	0.116666667	0.01622291	4.76E-05	0.00050065	0.000245615	673/847/1956/3569/3630/3643/5595	7
	hsa05323	Rheumatoid arthritis	0.1	0.011517028	6.02E-05	0.000604884	0.000296752	6347/3553/3569/7099/7124/7422	6
	hsa04657	IL-17 signaling pathway	0.1	0.011640867	6.40E-05	0.000614495	0.000301467	6347/3553/3569/5595/4318/7124	6
	hsa05215	Prostate cancer	0.1	0.012012384	7.63E-05	0.000702499	0.000344641	673/1956/3630/5595/4318/5327	6
	hsa05142	Chagas disease	0.1	0.012631579	0.000101015	0.000892972	0.000438086	6347/3553/3569/5595/7099/7124	6
	hsa05216	Thyroid cancer	0.066666667	0.004582043	0.000151459	0.001287405	0.000631592	673/5595/5468/6256	4
	hsa05161	Hepatitis B	0.116666667	0.02006192	0.00018159	0.00148635	0.000729193	673/3569/3718/5595/4318/7099/7124	7
	hsa05133	Pertussis	0.083333333	0.009411765	0.000235865	0.001797456	0.000881819	3553/3569/5595/7099/7124	5
	hsa05212	Pancreatic cancer	0.083333333	0.009411765	0.000235865	0.001797456	0.000881819	673/1019/1956/5595/7422	5
	hsa05164	Influenza A	0.116666667	0.021176471	0.00025348	0.001867299	0.000916084	6347/1019/3553/3569/5595/7099/7124	7
	hsa01521	EGFR tyrosine kinase inhibitor resistance	0.083333333	0.009783282	0.000282881	0.002016669	0.000989364	673/1956/3569/5595/7422	5
	hsa04976	Bile secretion	0.083333333	0.011145511	0.000518305	0.003510954	0.00172245	1576/3156/3949/9971/6256	5
	hsa04915	Estrogen signaling pathway	0.1	0.017089783	0.00052426	0.003510954	0.00172245	1956/2099/2100/5595/4318/4846	6
	hsa05224	Breast cancer	0.1	0.018204334	0.000732374	0.004760431	0.002335434	673/1019/1956/2099/2100/5595	6
	hsa04923	Regulation of lipolysis in adipocytes	0.066666667	0.006934985	0.000758231	0.004787685	0.002348805	154/2167/3630/3643	4
	hsa05134	Legionellosis	0.066666667	0.007058824	0.000810962	0.004978406	0.002442371	3553/3569/7099/7124	4
	hsa05146	Amoebiasis	0.083333333	0.012631579	0.000917779	0.005374453	0.002636669	3553/3569/5747/7099/7124	5
	hsa04370	VEGF signaling pathway	0.066666667	0.007306502	0.000924114	0.005374453	0.002636669	5595/4846/5747/7422	4
	hsa04934	Cushing syndrome	0.1	0.019195046	0.000966607	0.00547744	0.002687194	185/673/1019/1956/3949/5595	6
	hsa04620	Toll-like receptor signaling pathway	0.083333333	0.012879257	0.001001923	0.005535624	0.002715738	3553/3569/5595/7099/7124	5
	hsa04928	Parathyroid hormone synthesis, secretion and action	0.083333333	0.013126935	0.001091681	0.005852577	0.002871233	673/1591/1956/5595/6256	5
	hsa04213	Longevity regulating pathway - multiple species	0.066666667	0.007678019	0.00111407	0.005852577	0.002871233	847/3630/3643/6647	4
	hsa04659	Th17 cell differentiation	0.083333333	0.013250774	0.001138737	0.005852577	0.002871233	3553/3569/3718/5595/6256	5
	hsa05321	Inflammatory bowel disease	0.066666667	0.008049536	0.001329908	0.006679764	0.003277045	3553/3569/7099/7124	4
	hsa04010	MAPK signaling pathway	0.133333333	0.036408669	0.001382332	0.00668476	0.003279496	673/1956/3553/3630/3643/5595/7124/7422	8
	hsa05145	Toxoplasmosis	0.083333333	0.013869969	0.001396951	0.00668476	0.003279496	240/3949/5595/7099/7124	5
	hsa04022	cGMP-PKG signaling pathway	0.1	0.020681115	0.001421646	0.00668476	0.003279496	154/185/3630/3643/5595/4846	6
	hsa00052	Galactose metabolism	0.05	0.003839009	0.001511994	0.006819401	0.00334555	231/2645/8972	3
	hsa01523	Antifolate resistance	0.05	0.003839009	0.001511994	0.006819401	0.00334555	3553/3569/7124	3
	hsa05230	Central carbon metabolism in cancer	0.066666667	0.008668731	0.001752056	0.007744088	0.003799195	1956/2539/2645/5595	4
	hsa05218	Melanoma	0.066666667	0.008916409	0.001944313	0.008425358	0.004133422	673/1019/1956/5595	4
	hsa04621	NOD-like receptor signaling pathway	0.1	0.022414861	0.002142063	0.009103769	0.004466245	6347/3553/3569/5595/7099/7124	6
	hsa05214	Glioma	0.066666667	0.009287926	0.002259416	0.009421337	0.004622042	673/1019/1956/5595	4
	hsa05140	Leishmaniasis	0.066666667	0.009535604	0.002488055	0.010175268	0.004991915	3553/5595/7099/7124	4
	hsa04960	Aldosterone-regulated sodium reabsorption	0.05	0.004582043	0.002532306	0.010175268	0.004991915	3630/3643/5595	3
	hsa04926	Relaxin signaling pathway	0.083333333	0.015975232	0.002603645	0.0102751	0.005040892	1956/5595/4318/4846/7422	5
	hsa05202	Transcriptional misregulation in cancer	0.1	0.02377709	0.002879611	0.011164808	0.005477376	3569/4318/5327/5468/5747/6256	6
	hsa04910	Insulin signaling pathway	0.083333333	0.016965944	0.003377899	0.012870962	0.006314404	673/2645/3630/3643/5595	5
	hsa04012	ErbB signaling pathway	0.066666667	0.010526316	0.003562279	0.013203208	0.006477402	673/1956/5595/5747	4
	hsa05162	Measles	0.083333333	0.017213622	0.003594896	0.013203208	0.006477402	1019/3553/3569/3718/7099	5
	hsa05332	Graft-versus-host disease	0.05	0.005201238	0.003644325	0.013203208	0.006477402	3553/3569/7124	3
	hsa04940	Type I diabetes mellitus	0.05	0.005325077	0.003897117	0.013670838	0.006706817	3553/3630/7124	3
	hsa04975	Fat digestion and absorption	0.05	0.005325077	0.003897117	0.013670838	0.006706817	335/338/2169	3
	hsa04211	Longevity regulating pathway	0.066666667	0.011021672	0.004202184	0.014510667	0.007118832	847/3630/3643/5468	4
	hsa04015	Rap1 signaling pathway	0.1	0.026006192	0.004478192	0.015225853	0.007469697	673/1956/3630/3643/5595/7422	6
	hsa04072	Phospholipase D signaling pathway	0.083333333	0.018328173	0.004697132	0.015728276	0.007716182	185/1956/3630/3643/5595	5
	hsa04024	cAMP signaling pathway	0.1	0.026749226	0.005134464	0.016936068	0.008308717	154/268/673/2641/5595/5465	6
	hsa04150	mTOR signaling pathway	0.083333333	0.019195046	0.00570709	0.018548044	0.009099541	673/3630/3643/5595/7124	5
	hsa04060	Cytokine-cytokine receptor interaction	0.116666667	0.036408669	0.005835488	0.018690477	0.009169417	268/6347/2690/3553/3569/5617/7124	7
	hsa04979	Cholesterol metabolism	0.05	0.00619195	0.005966129	0.01883592	0.009240771	335/338/3949	3
	hsa04630	JAK-STAT signaling pathway	0.083333333	0.02006192	0.006862108	0.02135952	0.010478831	1956/2690/3569/3718/5617	5
	hsa04064	NF-kappa B signaling pathway	0.066666667	0.012879257	0.007288019	0.02206373	0.010824311	3553/7099/7124/7412	4
	hsa04625	C-type lectin receptor signaling pathway	0.066666667	0.012879257	0.007288019	0.02206373	0.010824311	3553/3569/5595/7124	4
	hsa05225	Hepatocellular carcinoma	0.083333333	0.020804954	0.007975355	0.023818291	0.011685087	673/1019/1956/3162/5595	5
	hsa05131	Shigellosis	0.1	0.02996904	0.008820416	0.025990826	0.012750917	1956/3553/5595/5747/7099/7124	6
	hsa05213	Endometrial cancer	0.05	0.007182663	0.009006984	0.026191362	0.012849299	673/1956/5595	3
	hsa04726	Serotonergic synapse	0.066666667	0.014241486	0.010316818	0.029302619	0.01437566	240/673/1564/5595	4
	hsa00140	Steroid hormone biosynthesis	0.05	0.00755418	0.010342101	0.029302619	0.01437566	1588/1576/3290	3
	hsa05152	Tuberculosis	0.083333333	0.022291022	0.010569141	0.029566838	0.014505284	3553/3569/5595/7099/7124	5
	hsa04152	AMPK signaling pathway	0.066666667	0.014860681	0.011927891	0.0329508	0.016165432	3156/3630/3643/5468	4
	hsa05221	Acute myeloid leukemia	0.05	0.008297214	0.013341362	0.036342276	0.017829266	673/5595/5467	3
	hsa04977	Vitamin digestion and absorption	0.033333333	0.002972136	0.013491402	0.036342276	0.017829266	335/338	2
	hsa04062	Chemokine signaling pathway	0.083333333	0.02377709	0.013692235	0.036342276	0.017829266	673/6347/3718/5595/5747	5
	hsa04664	Fc epsilon RI signaling pathway	0.05	0.008421053	0.013884497	0.036342276	0.017829266	240/5595/7124	3
	hsa05130	Pathogenic Escherichia coli infection	0.083333333	0.023900929	0.013977799	0.036342276	0.017829266	3553/3569/5595/7099/7124	5
	hsa04920	Adipocytokine signaling pathway	0.05	0.008544892	0.014440107	0.036681193	0.017995536	5465/6256/7124	3
	hsa05211	Renal cell carcinoma	0.05	0.008544892	0.014440107	0.036681193	0.017995536	673/5595/7422	3
	hsa04380	Osteoclast differentiation	0.066666667	0.015851393	0.014827834	0.037238083	0.018268743	3553/5595/5468/7124	4
	hsa04520	Adherens junction	0.05	0.00879257	0.015588896	0.038642	0.018957495	1956/3643/5595	3
	hsa04950	Maturity onset diabetes of the young	0.033333333	0.003219814	0.015736561	0.038642	0.018957495	2645/3630	2
	hsa04510	Focal adhesion	0.083333333	0.024891641	0.016408611	0.039849484	0.019549878	673/1956/5595/5747/7422	5
	hsa04371	Apelin signaling pathway	0.066666667	0.016965944	0.018584793	0.04436704	0.021766159	185/5595/4846/5327	4
	hsa05220	Chronic myeloid leukemia	0.05	0.009411765	0.018681386	0.04436704	0.021766159	673/1019/5595	3
	hsa05010	Alzheimer disease	0.116666667	0.045696594	0.018871049	0.04436704	0.021766159	673/3553/3569/3630/3643/5595/7124	7
	hsa00980	Metabolism of xenobiotics by cytochrome P450	0.05	0.009535604	0.019337872	0.044985997	0.022069815	1564/1576/3290	3
	hsa04810	Regulation of actin cytoskeleton	0.083333333	0.026501548	0.020935927	0.048196248	0.023644742	673/1956/3630/5595/5747	5
