# Supplementary material for: Use of Network Pharmacology to Explore the Mechanism of Gegen (Puerariae lobatae Radix) in the Treatment of Type 2 Diabetes Mellitus Associated with Hyperlipidemia
Source: Evid Based Complement Alternat Med. 2021 Apr 16;2021:6633402. doi: 10.1155/2021/6633402 (PMC8068526; doi:10.1155/2021/6633402)
Supplement: Supplementary Materials — include the following. Supplementary Material 1: active ingredients and targets of Gegen. Supplementary Material 2: targets of type 2 diabetes and hyperlipidemia. Supplementary Material 3: results of GO and KEGG enrichment. Supplementary Material 4: topological parameters of the compound-target-pathway network. [file 6633402.f1.zip › 6633402.f1/4Topological parameters of network.txt]

AverageShortestPathLength	BetweennessCentrality	ClosenessCentrality	ClusteringCoefficient	Degree	Eccentricity	IsSingleNode	name	NeighborhoodConnectivity	NumberOfDirectedEdges	NumberOfUndirectedEdges	PartnerOfMultiEdgedNodePairs	Radiality	selected	SelfLoops	shared name	Stress	TopologicalCoefficient	Type
1.296703297	0.309222961	0.771186441	0	65	3	FALSE	Type2DiabetesMellitus	6.230769231	0	65	0	0.995435334	FALSE	0	Type2DiabetesMellitus	39692	0.209230769	Disease
2.153846154	0.002746333	0.464285714	0	6	3	FALSE	ADRB2	35.16666667	0	6	0	0.982248521	FALSE	0	ADRB2	1490	0.525641026	Gene
2.197802198	0.001575423	0.455	0	4	3	FALSE	AGTR1	40.5	0	4	0	0.981572274	FALSE	0	AGTR1	724	0.607692308	Gene
2	0.021885162	0.5	0	13	3	FALSE	AKR1B1	21.92307692	0	13	0	0.984615385	FALSE	0	AKR1B1	6922	0.321893491	Gene
2.087912088	0.008639191	0.478947368	0	9	3	FALSE	ALDH2	27.11111111	0	9	0	0.983262891	FALSE	0	ALDH2	2696	0.401709402	Gene
2.153846154	0.00528473	0.464285714	0	6	3	FALSE	ALOX5	32.83333333	0	6	0	0.982248521	FALSE	0	ALOX5	1638	0.48974359	Gene
2.153846154	0.002270053	0.464285714	0	6	3	FALSE	AMH	36.5	0	6	0	0.982248521	FALSE	0	AMH	1228	0.546153846	Gene
2.197802198	0.002212528	0.455	0	4	3	FALSE	APOA1	42	0	4	0	0.981572274	FALSE	0	APOA1	894	0.630769231	Gene
2.21978022	2.55E-04	0.45049505	0	3	3	FALSE	APOB	53.33333333	0	3	0	0.98123415	FALSE	0	APOB	154	0.805128205	Gene
2.197802198	0.001935734	0.455	0	4	3	FALSE	BRAF	38.5	0	4	0	0.981572274	FALSE	0	BRAF	690	0.576923077	Gene
2.21978022	2.55E-04	0.45049505	0	3	3	FALSE	CAT	53.33333333	0	3	0	0.98123415	FALSE	0	CAT	154	0.805128205	Gene
2.131868132	0.006233331	0.469072165	0	7	3	FALSE	CCL2	29	0	7	0	0.982586644	FALSE	0	CCL2	2608	0.430769231	Gene
2.131868132	0.005516227	0.469072165	0	7	3	FALSE	CDK4	29.85714286	0	7	0	0.982586644	FALSE	0	CDK4	2272	0.443956044	Gene
2.21978022	5.47E-04	0.45049505	0	3	3	FALSE	CES1	49.66666667	0	3	0	0.98123415	FALSE	0	CES1	430	0.748717949	Gene
2.043956044	0.018836827	0.489247312	0	11	3	FALSE	CYP19A1	25.45454545	0	11	0	0.983939138	FALSE	0	CYP19A1	6328	0.376223776	Gene
2.21978022	2.80E-04	0.45049505	0	3	3	FALSE	CYP24A1	52.66666667	0	3	0	0.98123415	FALSE	0	CYP24A1	162	0.794871795	Gene
2.197802198	0.001645348	0.455	0	4	3	FALSE	CYP2D7	42.25	0	4	0	0.981572274	FALSE	0	CYP2D7	642	0.634615385	Gene
2.21978022	2.55E-04	0.45049505	0	3	3	FALSE	CYP3A4	53.33333333	0	3	0	0.98123415	FALSE	0	CYP3A4	154	0.805128205	Gene
2.21978022	4.15E-04	0.45049505	0	3	3	FALSE	DPAGT1	50.33333333	0	3	0	0.98123415	FALSE	0	DPAGT1	190	0.758974359	Gene
2	0.020240649	0.5	0	13	3	FALSE	EGFR	22.38461538	0	13	0	0.984615385	FALSE	0	EGFR	6250	0.328994083	Gene
2	0.018749541	0.5	0	13	3	FALSE	ESR1	23.69230769	0	13	0	0.984615385	FALSE	0	ESR1	6514	0.349112426	Gene
2.043956044	0.012941611	0.489247312	0	11	3	FALSE	ESR2	26.27272727	0	11	0	0.983939138	FALSE	0	ESR2	5156	0.388811189	Gene
2.197802198	0.00221503	0.455	0	4	3	FALSE	F7	37.25	0	4	0	0.981572274	FALSE	0	F7	514	0.557692308	Gene
2.197802198	0.002901424	0.455	0	4	3	FALSE	FABP2	37.25	0	4	0	0.981572274	FALSE	0	FABP2	1148	0.557692308	Gene
2.197802198	0.002901424	0.455	0	4	3	FALSE	FABP4	37.25	0	4	0	0.981572274	FALSE	0	FABP4	1148	0.557692308	Gene
2.197802198	0.001828761	0.455	0	4	3	FALSE	G6PD	40	0	4	0	0.981572274	FALSE	0	G6PD	988	0.6	Gene
2.21978022	0.001038264	0.45049505	0	3	3	FALSE	GCG	46.66666667	0	3	0	0.98123415	FALSE	0	GCG	254	0.702564103	Gene
2.175824176	0.005336425	0.45959596	0	5	3	FALSE	GCK	33.8	0	5	0	0.981910397	FALSE	0	GCK	1342	0.504615385	Gene
2.197802198	0.001111444	0.455	0	4	3	FALSE	GHR	43.5	0	4	0	0.981572274	FALSE	0	GHR	566	0.653846154	Gene
2.197802198	9.84E-04	0.455	0	4	3	FALSE	HMGCR	44.25	0	4	0	0.981572274	FALSE	0	HMGCR	728	0.665384615	Gene
2.175824176	0.003166373	0.45959596	0	5	3	FALSE	HMOX1	34.2	0	5	0	0.981910397	FALSE	0	HMOX1	1250	0.510769231	Gene
2.175824176	0.004995282	0.45959596	0	5	3	FALSE	HSD11B1	33	0	5	0	0.981910397	FALSE	0	HSD11B1	1714	0.492307692	Gene
2.131868132	0.00684067	0.469072165	0	7	3	FALSE	IL1B	28	0	7	0	0.982586644	FALSE	0	IL1B	2576	0.415384615	Gene
2.065934066	0.013094854	0.484042553	0	10	3	FALSE	IL6	24.6	0	10	0	0.983601014	FALSE	0	IL6	4422	0.363076923	Gene
2.065934066	0.017994371	0.484042553	0	10	3	FALSE	INS	21.3	0	10	0	0.983601014	FALSE	0	INS	4450	0.312307692	Gene
2.087912088	0.014592889	0.478947368	0	9	3	FALSE	INSR	21.55555556	0	9	0	0.983262891	FALSE	0	INSR	3596	0.316239316	Gene
2.197802198	0.001305823	0.455	0	4	3	FALSE	JAK3	41.25	0	4	0	0.981572274	FALSE	0	JAK3	602	0.619230769	Gene
2.175824176	0.00393725	0.45959596	0	5	3	FALSE	LDLR	38.6	0	5	0	0.981910397	FALSE	0	LDLR	1172	0.578461538	Gene
2.021978022	0.021601072	0.494565217	0	12	3	FALSE	MAPK3	22.58333333	0	12	0	0.984277261	FALSE	0	MAPK3	6678	0.332051282	Gene
2.153846154	0.002270053	0.464285714	0	6	3	FALSE	MGAM	36.5	0	6	0	0.982248521	FALSE	0	MGAM	1228	0.546153846	Gene
2.153846154	0.005162095	0.464285714	0	6	3	FALSE	MMP9	31	0	6	0	0.982248521	FALSE	0	MMP9	2058	0.461538462	Gene
2.197802198	0.001207581	0.455	0	4	3	FALSE	MTRR	41.5	0	4	0	0.981572274	FALSE	0	MTRR	486	0.623076923	Gene
2.021978022	0.016112894	0.494565217	0	12	3	FALSE	NOS3	24.5	0	12	0	0.984277261	FALSE	0	NOS3	6134	0.361538462	Gene
2.197802198	0.002119446	0.455	0	4	3	FALSE	NR1H2	39.25	0	4	0	0.981572274	FALSE	0	NR1H2	806	0.588461538	Gene
2.153846154	0.006159606	0.464285714	0	6	3	FALSE	NR1H3	28.83333333	0	6	0	0.982248521	FALSE	0	NR1H3	1976	0.428205128	Gene
2.197802198	0.00401805	0.455	0	4	3	FALSE	NR1H4	36.5	0	4	0	0.981572274	FALSE	0	NR1H4	1188	0.546153846	Gene
2.21978022	5.47E-04	0.45049505	0	3	3	FALSE	NR3C1	49.66666667	0	3	0	0.98123415	FALSE	0	NR3C1	430	0.748717949	Gene
2.197802198	0.00162442	0.455	0	4	3	FALSE	PLAT	40.5	0	4	0	0.981572274	FALSE	0	PLAT	754	0.607692308	Gene
2.131868132	0.003376523	0.469072165	0	7	3	FALSE	PON1	34	0	7	0	0.982586644	FALSE	0	PON1	2014	0.507692308	Gene
2.043956044	0.016234179	0.489247312	0	11	3	FALSE	PPARA	24.81818182	0	11	0	0.983939138	FALSE	0	PPARA	5890	0.366433566	Gene
2.175824176	0.003815458	0.45959596	0	5	3	FALSE	PPARD	33.6	0	5	0	0.981910397	FALSE	0	PPARD	1688	0.501538462	Gene
2.043956044	0.013379836	0.489247312	0	11	3	FALSE	PPARG	26	0	11	0	0.983939138	FALSE	0	PPARG	5134	0.384615385	Gene
2.175824176	0.003418965	0.45959596	0	5	3	FALSE	PRL	36	0	5	0	0.981910397	FALSE	0	PRL	1094	0.538461538	Gene
2.10989011	0.006752727	0.473958333	0	8	3	FALSE	PTK2	29.625	0	8	0	0.982924768	FALSE	0	PTK2	2898	0.440384615	Gene
2.10989011	0.008574335	0.473958333	0	8	3	FALSE	RXRA	27.625	0	8	0	0.982924768	FALSE	0	RXRA	3150	0.409615385	Gene
2.153846154	0.004613548	0.464285714	0	6	3	FALSE	SELE	31.33333333	0	6	0	0.982248521	FALSE	0	SELE	2056	0.466666667	Gene
2.21978022	4.15E-04	0.45049505	0	3	3	FALSE	SELP	50.33333333	0	3	0	0.98123415	FALSE	0	SELP	190	0.758974359	Gene
2.197802198	0.001828761	0.455	0	4	3	FALSE	SHBG	40	0	4	0	0.981572274	FALSE	0	SHBG	988	0.6	Gene
2.21978022	4.15E-04	0.45049505	0	3	3	FALSE	SOD1	50.33333333	0	3	0	0.98123415	FALSE	0	SOD1	190	0.758974359	Gene
2.065934066	0.010220001	0.484042553	0	10	3	FALSE	SORD	25.9	0	10	0	0.983601014	FALSE	0	SORD	3264	0.383076923	Gene
2.21978022	5.47E-04	0.45049505	0	3	3	FALSE	SREBF2	49.66666667	0	3	0	0.98123415	FALSE	0	SREBF2	430	0.748717949	Gene
2.21978022	4.15E-04	0.45049505	0	3	3	FALSE	TIMP2	50.33333333	0	3	0	0.98123415	FALSE	0	TIMP2	190	0.758974359	Gene
2.175824176	0.002751938	0.45959596	0	5	3	FALSE	TLR4	34.8	0	5	0	0.981910397	FALSE	0	TLR4	1076	0.52	Gene
2.021978022	0.025708012	0.494565217	0	12	3	FALSE	TNF	18.91666667	0	12	0	0.984277261	FALSE	0	TNF	5894	0.275641026	Gene
2.10989011	0.007196252	0.473958333	0	8	3	FALSE	VCAM1	29.875	0	8	0	0.982924768	FALSE	0	VCAM1	3270	0.444230769	Gene
2.087912088	0.008431792	0.478947368	0	9	3	FALSE	VEGFA	28.22222222	0	9	0	0.983262891	FALSE	0	VEGFA	3704	0.418803419	Gene
1.296703297	0.309222961	0.771186441	0	65	3	FALSE	Hyperlipidemia	6.230769231	0	65	0	0.995435334	FALSE	0	Hyperlipidemia	39692	0.209230769	Disease
2.021978022	0.013399676	0.494565217	0	12	3	FALSE	Gegen	15.41666667	0	12	0	0.984277261	FALSE	0	Gegen	4220	0.221794872	Herb
2.417582418	0.01244243	0.413636364	0	15	4	FALSE	M1	9	0	15	0	0.97819104	FALSE	0	M1	2622	0.333333333	Mol
2.395604396	0.01142723	0.417431193	0	17	4	FALSE	M2	9.705882353	0	17	0	0.978529163	FALSE	0	M2	2854	0.378516624	Mol
2.505494505	0.006936526	0.399122807	0	14	4	FALSE	M3	10.07142857	0	14	0	0.976838546	FALSE	0	M3	1746	0.431972789	Mol
2.659340659	0.001260693	0.376033058	0	6	4	FALSE	M4	11.5	0	6	0	0.974471682	FALSE	0	M4	420	0.477272727	Mol
2.43956044	0.020709982	0.40990991	0	19	4	FALSE	M5	7.157894737	0	19	0	0.977852916	FALSE	0	M5	2798	0.324099723	Mol
2.263736264	0.028484116	0.441747573	0	21	3	FALSE	M6	7.714285714	0	21	0	0.980557904	FALSE	0	M6	4820	0.268571429	Mol
2.065934066	0.049814731	0.484042553	0	30	3	FALSE	M7	7.9	0	30	0	0.983601014	FALSE	0	M7	9208	0.276	Mol
2.10989011	0.045433896	0.473958333	0	28	3	FALSE	M8	8.75	0	28	0	0.982924768	FALSE	0	M8	10138	0.31	Mol
2.659340659	0.006851875	0.376033058	0	11	4	FALSE	M9	7	0	11	0	0.974471682	FALSE	0	M9	894	0.352941176	Mol
2.527472527	0.004794219	0.395652174	0	10	4	FALSE	M10	10	0	10	0	0.976500423	FALSE	0	M10	1066	0.375	Mol
2.857142857	0.001032125	0.35	0	5	4	FALSE	M11	9	0	5	0	0.971428571	FALSE	0	M11	172	0.571428571	Mol
2.549450549	0.003244995	0.392241379	0	9	4	FALSE	M12	10.77777778	0	9	0	0.976162299	FALSE	0	M12	900	0.407407407	Mol
2.615384615	0.004946339	0.382352941	0	11	4	FALSE	AGE-RAGE signaling pathway in diabetic complications	8.545454545	0	11	0	0.975147929	FALSE	0	AGE-RAGE signaling pathway in diabetic complications	880	0.397129187	Pathway
2.637362637	0.004991896	0.379166667	0	11	4	FALSE	Fluid shear stress and atherosclerosis	7.636363636	0	11	0	0.974809806	FALSE	0	Fluid shear stress and atherosclerosis	772	0.368686869	Pathway
2.659340659	0.003527697	0.376033058	0	9	4	FALSE	Endocrine resistance	8.666666667	0	9	0	0.974471682	FALSE	0	Endocrine resistance	714	0.403508772	Pathway
2.791208791	0.002786891	0.358267717	0	8	4	FALSE	PPAR signaling pathway	6.625	0	8	0	0.972442942	FALSE	0	PPAR signaling pathway	362	0.401785714	Pathway
2.615384615	0.003642631	0.382352941	0	9	4	FALSE	HIF-1 signaling pathway	9.444444444	0	9	0	0.975147929	FALSE	0	HIF-1 signaling pathway	776	0.402116402	Pathway
2.483516484	0.00972105	0.402654867	0	14	4	FALSE	PI3K-Akt signaling pathway	8.285714286	0	14	0	0.977176669	FALSE	0	PI3K-Akt signaling pathway	1788	0.331168831	Pathway
2.593406593	0.003444413	0.38559322	0	8	4	FALSE	Insulin resistance	9.25	0	8	0	0.975486052	FALSE	0	Insulin resistance	860	0.358695652	Pathway
2.703296703	0.002350766	0.369918699	0	8	4	FALSE	TNF signaling pathway	8.5	0	8	0	0.973795435	FALSE	0	TNF signaling pathway	422	0.416666667	Pathway
2.703296703	0.001607119	0.369918699	0	6	4	FALSE	Prolactin signaling pathway	9.333333333	0	6	0	0.973795435	FALSE	0	Prolactin signaling pathway	380	0.416666667	Pathway
2.593406593	0.003425827	0.38559322	0	8	4	FALSE	Non-alcoholic fatty liver disease	9.125	0	8	0	0.975486052	FALSE	0	Non-alcoholic fatty liver disease	884	0.35326087	Pathway
2.747252747	0.001183695	0.364	0	5	4	FALSE	Type II diabetes mellitus	9.6	0	5	0	0.973119189	FALSE	0	Type II diabetes mellitus	256	0.452631579	Pathway
2.791208791	0.001216991	0.358267717	0	5	4	FALSE	Ovarian steroidogenesis	8.2	0	5	0	0.972442942	FALSE	0	Ovarian steroidogenesis	236	0.423529412	Pathway
